# Supplementary material
Source: PubMed Central journal article supplement (PMC7368380)
Supplement: NIHMS1001963-supplement-Si_doc.pdf [file NIHMS1001963-supplement-Si_doc.pdf]

Supporting Information for:

## Enzymatic reconstitution and biosynthetic investigation of the lasso peptide Fusilassin

Adam J. DiCaprio<sup>†‡</sup>, Arash Firouzbakht<sup>†‡</sup>, Graham A. Hudson<sup>†‡</sup>, Douglas A. Mitchell<sup>†‡\*</sup>

<sup>†</sup>Department of Chemistry, University of Illinois at Urbana-Champaign, 600 South Mathews Avenue, Urbana, Illinois 61801, USA. <sup>‡</sup>Carl R. Woese Institute for Genomic Biology, University of Illinois at Urbana-Champaign, 1206 West Gregory Drive, Urbana, Illinois 61801, USA.

\* Corresponding author:

Douglas A. Mitchell (douglasm@illinois.edu), phone: 1-217-333-1345, fax: 1-217-333-0508

### Table of Contents:

|                                                                                                                                  |     |
|----------------------------------------------------------------------------------------------------------------------------------|-----|
| Experimental Methods.....                                                                                                        | S3  |
| Table S1: Sequence of <i>fus</i> biosynthetic genes for <i>E. coli</i> expression and expression constructs .....                | S8  |
| Table S2: Oligonucleotide primers used in this study .....                                                                       | S12 |
| Figure S1: <i>E. coli</i> expression of fusilassin core 1 variants.....                                                          | S15 |
| Figure S2: SDS-PAGE analysis of proteins used in this study .....                                                                | S16 |
| Figure S3: HR-ESI-MS/MS of biosynthetically reconstituted fusilassin.....                                                        | S17 |
| Figure S4: FusB multiple sequence alignment .....                                                                                | S18 |
| Figure S5: MALDI-TOF MS of FusB variants .....                                                                                   | S19 |
| Figure S6: FusC multiple sequence alignment .....                                                                                | S20 |
| Figure S7: MALDI-TOF MS of FusC variants .....                                                                                   | S21 |
| Figure S8: Expanded view of biosynthetically reconstituted FusA-W1E and FusA-W1P .....                                           | S22 |
| Figure S9: Biosynthetically reconstituted synthetic core peptides.....                                                           | S23 |
| Figure S10: MALDI-TOF-MS HDX of reconstituted fusilassin.....                                                                    | S24 |
| Figure S11: MALDI-TOF-MS of carboxypeptidase Y digested fusilassin .....                                                         | S25 |
| Figure S12: MALDI-TOF MS of carboxypeptidase Y digested fusilassin variants .....                                                | S26 |
| Figure S13: Biosynthetically reconstituted fusilassin ring distortions .....                                                     | S27 |
| Figure S14: HR-ESI-MS/MS of biosynthetically reconstituted lasso peptide variants.....                                           | S28 |
| Figure S15: Biosynthetically reconstituted of fusilassin tail variants .....                                                     | S31 |
| Figure S16: Threading studies of biosynthetically reconstituted FusA <sub>leader</sub> CitA <sub>core</sub> (D8E) .....          | S32 |
| Figure S17: Threading studies of biosynthetically reconstituted FusA <sub>leader</sub> CitA <sub>core</sub> (L1W-D8E-A5ins)..... | S33 |
| Figure S18: <i>E. coli</i> expression of CitA core variants .....                                                                | S34 |
| Figure S19: Fluorescence polarization of FusA <sub>leader</sub> variants.....                                                    | S35 |

|                                                                                        |     |
|----------------------------------------------------------------------------------------|-----|
| Table S3: Fluorescence polarization values of FusA <sub>leader</sub> variants.....     | S36 |
| Figure S20: GREMLIN coevolutionary analysis of FusA, FusE, and FusB.....               | S37 |
| Figure S21: Fluorescence polarization of FusE variants.....                            | S38 |
| Table S4: Fluorescence polarization values of FusE variants.....                       | S40 |
| Figure S22: Isoelectric point calculation of lasso peptide biosynthetic enzymes .....  | S41 |
| Figure S23: Phylogenetic tree of lasso cyclases.....                                   | S42 |
| Figure S24: Sequence similarity network of lasso cyclases.....                         | S44 |
| Figure S25: Diversity of lasso peptide precursor ring size and acceptor residues ..... | S45 |
| Supplemental References .....                                                          | S46 |

## Experimental Methods.

**General materials and methods.** Reagents used for molecular biology experiments were purchased from New England BioLabs (Ipswich, MA), Thermo Fisher Scientific (Waltham, MA), or Gold Biotechnology Inc. (St. Louis, MO). Other chemicals were purchased from Sigma-Aldrich (St. Louis, MO). *Escherichia coli* DH5 $\alpha$  and BL21 (DE3) strains were used for plasmid maintenance and protein overexpression, respectively. *Thermobifida fusca* was identified as a potential producer of a lasso peptide using previously published RODEO-based genome mining<sup>1</sup> and was obtained from the USDA Agriculture Research Service strain collection (Peoria, IL). Matrix-assisted laser desorption time of flight mass spectrometry MALDI-TOF-MS analysis was performed using a Bruker UltrafleXtreme mass spectrometer in reflector positive mode at the University of Illinois School of Chemical Sciences Mass Spectrometry Laboratory. Electrospray ionization (ESI)-MS/MS analyses were performed using a ThermoFisher Scientific Orbitrap Fusion ESI-MS using an Advion TriVersa Nanomate 100.

**Molecular biology techniques.** Oligonucleotides were purchased from Integrated DNA Technologies Inc. (Coralville, IA). *Thermobifida fusca* genomic DNA was isolated using an UltraClean Microbial DNA Isolation Kit (MO BIO, now available from Qiagen). Purified gDNA isolates were used to clone biosynthetic proteins using the primers listed in **Table S2**. Amplicons were purified using a QIAprep PCR Cleanup Spin Kit (Qiagen). The isolated DNA was then treated with appropriate restriction enzymes (**Table S2**, NEB). Digested inserts were re-purified using a QIAprep PCR Cleanup Spin Kit (Qiagen). The digested genes were reconstituted with a similarly digested and gel-purified pET28-MBP vector and subsequently ligated using T4 DNA ligase (NEB). Ligation reactions were transformed into chemically competent DH5 $\alpha$  cells, which were plated on lysogeny broth (LB) agar plates containing 50  $\mu\text{g}/\text{mL}$  kanamycin and grown at 37 °C overnight. Colonies were picked at random and grown in LB broth containing 50  $\mu\text{g}/\text{mL}$  kanamycin for 16–20 h prior to plasmid isolation using a QIAprep Spin Miniprep Kit. All recombinant constructs contained an MBP-tag followed by a TEV-protease site and were sequenced using a custom MBP forward primer. All constructs were Sanger sequenced using a T7 terminator primer if necessary (**Table S2**).

For *E. coli* expression plasmids, FusB and FusE were cloned individually with the primers listed in **Table 2**. Individual amplicons shared an overlapping sequence (3' to FusE and 5' to FusB) containing an inserted ribosome binding site. These amplicons were purified using a QIAprep PCR Cleanup Spin Kit (Qiagen) and used as templates for a second round of PCR to combine the fragments using primers listed in **Table S2**. This amplicon was purified using a QIAprep PCR Cleanup Spin Kit (Qiagen). This fragment was inserted into the second multiple cloning site (MCS) of amplified pACYCDuet vector (primers in **Table S2**) using Gibson Assembly HiFi master mix (NEB). Ligation reactions were used to transform chemically competent DH5 $\alpha$  cells, which were plated on LB agar plates containing 34  $\mu\text{g}/\text{mL}$  chloramphenicol and grown at 37 °C overnight. Colonies were picked at random and grown in LB broth containing 34  $\mu\text{g}/\text{mL}$  chloramphenicol for 16–20 h prior to plasmid isolation using a QIAprep Spin Miniprep Kit. This construct was verified by Sanger sequencing using a T7 terminator primer.

FusC was cloned from *T. fusca* gDNA using the primers listed in **Table S2**. Amplicons were purified using a QIAprep PCR Cleanup Spin Kit (Qiagen). The isolated DNA was then treated with appropriate restriction enzymes (**Table S2**, NEB). Digested inserts were re-purified using a QIAprep PCR Cleanup Spin Kit (Qiagen). The digested genes were reconstituted with an appropriate endonuclease-digested and gel-purified pACYCDuet-MCSI-FusEB vector and ligated using T4 DNA ligase (NEB). Ligation reactions were used to transform chemically competent DH5 $\alpha$  cells, which were plated on LB agar plates containing 34  $\mu\text{g}/\text{mL}$  chloramphenicol and grown at 37 °C overnight. Colonies were picked at random and grown in LB broth containing 34  $\mu\text{g}/\text{mL}$  chloramphenicol for 16–20 h prior to plasmid isolation using a QIAprep Spin Miniprep Kit. Recombinant constructs contained an N-terminal His<sub>6</sub>-tag. This construct was sequenced using custom forward and reverse primers (**Table S2**). The ABC transporter FusD was not included in our cloning pipeline.

Site-directed mutagenesis on FusA, FusB, FusC and FusE was performed using the QuikChange method (Agilent) as per the manufacturer's instructions using Q5 DNA polymerase (NEB). The primers for each mutant are listed in **Table S2**. The mutant FusA-W1E was cloned using indicated primers and previously described site-directed ligase-independent mutagenesis (SLIM).<sup>2</sup> The mutations were verified by Sanger sequencing using the MBP forward primer or the T7 terminator primer.

***E. coli*-based expression of fusilassin.** *E. coli* (BL21(DE3)) cells were co-transformed with pACYC-FusCEB and pET28-MBP-FusA. Cells were grown overnight on LB agar plates containing 50 µg/mL kanamycin and 34 µg/mL chloramphenicol at 37 °C. Single colonies were used to inoculate 10 mL of LB containing 50 µg/mL kanamycin and 34 µg/mL chloramphenicol and grown at 30 °C for 12 h. This culture was used to inoculate 250 mL of LB containing 25 µg/mL kanamycin and 17 µg/mL chloramphenicol which was grown at 37 °C to an optical density at 600 nm (OD<sub>600</sub>) of 0.7-0.8. Expression was then induced by the addition of 0.5 mM (final concentration) isopropyl β-D-1-thiogalactopyranoside (IPTG). Expression was allowed to proceed for 3 h at 37 °C. Cells were harvested by centrifugation at 4,500 × g for 10 min. The harvested cells were extracted with 10 mL methanol with shaking for 3 h at room temperature. Extracts were clarified by centrifugation at 4,500 × g for 20 min and stored at -20 °C until analysis. Samples were analyzed by MALDI-TOF MS by spotting on a MALDI target with a 1:1 volume of saturated sinapinic acid in 7:3:0.1 acetonitrile (MeCN):H<sub>2</sub>O:formic acid (FA).

**MBP-tagged peptide and enzyme overexpression and purification.** *E. coli* BL21(DE3) cells were transformed with a pET28 plasmid encoding the MBP-tagged enzyme or peptide of interest. Cells were grown overnight on LB agar plates containing 50 µg/mL kanamycin at 37 °C. Single colonies were used to inoculate 10 mL of LB containing 50 µg/mL kanamycin and grown at 30 °C for 12 h. This culture was used to inoculate 1 L of LB containing 37.5 µg/mL kanamycin and 25.5 µg/mL chloramphenicol which was grown at 37 °C to an OD<sub>600</sub> of 0.7-0.8. Protein expression was then induced by the addition of 0.5 mM (final concentration) IPTG. Expression was allowed to proceed for 3 h at 37 °C. Cells were harvested by centrifugation at 4,500 × g for 10 min, flash-frozen, and stored at -80 °C for a maximum of 7 d before use.

Cell pellets were resuspended in lysis buffer (50 mM Tris-HCl pH 7.4, 500 mM NaCl, 2.5% glycerol (v/v), and 0.1% Triton X-100) containing 100-120 mg lysozyme and 500 µL protease inhibitor cocktail (PIC, 6 mM PMSF, 0.1 mM leupeptin, 0.1 mM E64). Expressions of MBP-FusB were not treated with PIC owing to a concern over inhibition of catalytic activity. After resuspension, cells were lysed by sonication (3 × 45 s with 10 min rocking periods at 4 °C). Insoluble debris was removed by centrifugation at 17,000 × g for 60 min. The supernatant was then applied to a pre-equilibrated amylose resin (NEB; 5 mL of resin per L of culture). The column was washed with 10 column volumes (CV) of lysis buffer followed by 10 CV of wash buffer (lysis buffer without Triton X-100). The MBP-tagged proteins were eluted with 15 mL elution buffer (lysis buffer with 300 mM NaCl, 10 mM maltose, and lacking Triton X-100) and collected into an appropriate molecular weight cutoff (MWCO) Amicon Ultra centrifugal filter (EMD Millipore). Protein eluent was concentrated to ~1.5 mL and exchanged with 10× volume of protein storage buffer [50 mM HEPES pH 7.5, 300 mM NaCl, 0.5 mM tris-(2-carboxyethyl)-phosphine (TCEP), 2.5% glycerol (v/v)]. Protein concentrations were assayed using 280 nm absorbance (theoretical extinction coefficients were calculated using the ExPASy ProtParam tool; <http://web.expasy.org/protparam/protpar-ref.html>). Final protein purity was assessed visually using a Coomassie-stained SDS-PAGE gel (**Figure S1**).

**Expression and purification of MBP-FusC.** Chemically competent *E. coli* BL21 (DE3) cells (50 µL) were co-transformed with pET28-MBP-FusC and pGro7 chaperone plasmid (Takara Bio USA, Inc.) and plated on LB agar plates supplemented with 50 µg/mL kanamycin and 37µg/mL chloramphenicol and grown at 37 °C overnight. A single colony was used to inoculate 10 mL of LB supplemented with kanamycin and chloramphenicol (as above), grown for 12 h at 30 °C. Cultures were used to inoculate 1L of LB containing 25 µg/mL kanamycin, 17 µg/mL chloramphenicol, and 0.5-4 mg/mL L-arabinose, which were grown at 37 °C to an OD<sub>600</sub> of 0.7-0.8. Protein expression was induced by the addition of IPTG to a final concentration of 0.5 mM and cultures were grown at 37 °C for 3 h. Protein purification by amylose resin affinity chromatography was performed as above.

To express variants of MBP-FusC, chemically competent *E. coli* BL21 (DE3) cells were transformed with mutant pET28-MBP-FusC plated on LB agar plates supplemented with 50 µg/mL kanamycin and grown at 37 °C overnight. A single colony was used to inoculate 10 mL of LB supplemented with 50 µg/mL kanamycin and grown for 16 h at 37 °C. Cultures were used to inoculate 1 L of LB supplemented with 30 µg/mL kanamycin and 3% (v/v) molecular biology grade 100% ethanol. Given the influence of the Gro chaperone on proper folding of FusC, we simplified the dual plasmid expression system using ethanol-induced Gro expression.<sup>3</sup> Cells were grown at 37 °C to an OD<sub>600</sub> of 0.7–0.8. Protein expression was induced by the addition of IPTG to a final concentration of 0.5 mM and cultures were grown at 37 °C for 3 h. Protein purification by amylose resin affinity chromatography was performed as above.

**Synthetic peptides.** Synthetic peptides were purchased from Genscript and were used without further purification [purity: 73% FusA<sub>core</sub>; 91% FusA-W1P<sub>core</sub>]. No interfering masses were observed by MS analysis.



***In vitro* enzymatic reconstitution of fusilassin biosynthesis.** Purified enzymes were reconstituted in 100  $\mu$ L synthetase buffer (50 mM Tris-HCl pH 7.5, 125 mM NaCl, 20 mM MgCl<sub>2</sub>, 10 mM DTT, 5 mM ATP) at the molar ratios of 1:5 MBP-FusBCE:MBP-FusA. Reactions were allowed to progress for 3 h at 37 °C. Samples were spotted on a MALDI target with an equal volume of saturated sinapinic acid in 7:3:0.1 MeCN:H<sub>2</sub>O:FA. Reaction extent was estimated as the proportion of the masses corresponding to the linear precursor and the dehydrated, macrolactam-containing product (-18 Da).

**Preparation and purification of citrulassin variants.** *In vitro* biosynthetic reconstitution reactions (200  $\mu$ L total volume) were initiated as above, except molar ratios of MBP-FusCEB:Precursor peptide was increased to 10:1. Reactions were diluted with 7:3 MeCN:H<sub>2</sub>O (1% formic acid, v/v) to the HPLC starting conditions of the HPLC run. After clarification by centrifugation (17,000  $\times$  g for 15 mins) the full reaction volume was injected onto an Agilent 1200 series HPLC fitted with a pre-equilibrated 4.6  $\times$  250 mm Zorbax C8 column (Agilent) operating at 1 mL/min. A gradient elution was used with solvent A (H<sub>2</sub>O, 0.1% formic acid) and solvent B (MeCN, 0.1% formic acid) according to the following linear gradient combinations: 0-5 min held at 20% B, 5-25 min increased to 55% B, 25-28 min increased to 100% B, 28-33 min held at 100% B. Fractions were screened for the presence of the respective macrolactam product (CitA-D8E  $m/z$  = 1579 Da, CitA-L1W- $\Delta$ A5-D8E  $m/z$  = 1581 Da) by MALDI-TOF-MS. Positive fractions were concentrated to dryness under vacuum. Products were resuspended in 25  $\mu$ L of 7:3 MeCN:H<sub>2</sub>O and 1% formic acid and analyzed by MS.

**High-resolution MS analysis of lasso peptide variants.** Wild-type fusilassin and the ring expanded 10-mer variant produced through *in vitro* enzymatic reactions were desalted by ZipTip and eluted with 75% aq. MeCN. Citrulassin A analogs were first purified by HPLC (see above). Samples were directly infused into a ThermoFisher Scientific Orbitrap Fusion ESI-MS using an Advion TriVersa Nanomate 100. The MS was calibrated and tuned with Pierce LTQ Velos ESI Positive Ion Calibration Solution (ThermoFisher). The MS was operated using the following parameters: resolution, 100,000; isolation width (MS/MS), 2  $m/z$ ; normalized collision energy (MS/MS), 70; activation q value (MS/MS), 0.4; activation time (MS/MS), 30 ms. Fragmentation was performing using collision-induced dissociation (CID) at 70%. Data analysis was conducted using the Qualbrowser application of Xcalibur software (Thermo-Fisher Scientific).

**Multiple sequence alignments.** The sequence alignments shown in Figs S4 & S6 were generated using Clustal Omega<sup>4</sup> (<https://www.ebi.ac.uk/Tools/msa/clustalo/>). The MUSCLE module in MEGA-X<sup>5</sup> with the default parameters was used to prepare MSAs for larger datasets.

#### **Enzymatic activity of Ala-substituted FusB and FusC proteins.**

**FusB variants.** Enzymatic reconstitution of FusB variants was performed as above, but omitted FusC. Cleavage of the leader peptide was assessed by withdrawing 4  $\mu$ L of the reaction, diluting with 40  $\mu$ L 1% (v/v) aqueous formic acid and desalting by ZipTip. Samples were eluted with 3  $\mu$ L of a saturated solution of  $\alpha$ -cyano-4-hydroxycinnamic acid (CHCA) in 70:30:0.1 MeCN:H<sub>2</sub>O:formic acid and spotted onto the MALDI target. Reaction efficiencies were estimated as a function of the ion intensity of  $m/z$  = 2287 Da (FusA<sub>core</sub>) relative to  $m/z$  = 4955 Da (FusA<sub>precursor</sub>).

**FusC variants.** Enzymatic reconstitution of FusC variants was performed as above, including FusC. Reaction efficiencies were estimated as a function of the ion intensity of  $m/z$  = 2269 Da (Fus) relative to that of  $m/z$  = 2287 Da (FusA<sub>core</sub>).

**Compendium of all lasso peptides found in GenBank.** A non-redundant list of 3,661 leader peptidase protein accession identifiers from protein family PF13471 (transglut\_core3) was gathered using four iterations of PSI-BLAST with known lasso leader peptidase proteins from Firmicutes, Proteobacteria, and Actinobacteria as the query. After removal of redundant sequences, each NCBI protein accession identifier was submitted to RODEO2 (<https://github.com/thedamlab/rodeo2>) using the scoring function for lasso peptide precursor prediction. Initial gene cluster analysis yielded ~125,000 putative peptides that co-occurred with the queried leader peptidase. Entries corresponding to redundant core peptides were removed by standard excel functions such that each unique core peptide sequence occurred only once per leader peptidase query. Hypothetical peptides receiving a score of <5 were deleted. Peptides with a score between 5-9 (~3,400 non-redundant sequences) are found in **Supplemental Dataset 1** on the “Lower Scoring” tab. The false-positive rate here is expected to be high although there are many valid-looking biosynthetic gene clusters present that harbor a non-conforming precursor peptide. Peptides receiving a

score of 10 or greater are considered to be most probable candidates for being a true lasso precursor peptide. This list was manually curated to remove entries that look incapable of forming a lasso peptide. These are included in **Supplemental Dataset 1** on the “Higher Scoring” tab, which contains ~3,000 non-redundant sequences.

**Protein isoelectric point calculation.** Isoelectric point calculations were performed using the Isoelectric Point Calculator<sup>6</sup>, and reported values were the averages of the 14 separate formulae used in the algorithm.

**Coevolutionary analysis of leader peptide:RRE and RRE:leader peptidase.** Coevolutionary analysis of the leader peptide, RRE, and leader peptidase were performed using GREMLIN (<http://gremlin.bakerlab.org/>). First, the sequences of leader peptide, RRE, and the leader peptidase of the lasso peptide BGCs identified above that encode a discrete protease (i.e. non-fused) were retrieved. In cases where a BGC encoded >1 putative precursor peptide, only the top-scoring peptide was analyzed. Next, two paired alignments were generated using MUSCLE in MEGA-X. One included the leader peptide and RRE sequences while the second contained the RRE and leader peptidase sequences. Finally, the two alignments were separately submitted to GREMLIN by setting iterations to 0, filtering sequences that have less than 75% coverage by the template sequence, and removing sites on the alignment with <75% coverage. In both GREMLIN submissions, the Fus sequences were used as template (the first entry in the alignment).

**Preparation of fluorescently labeled FusA<sub>leader</sub>.** HPLC-purified FusA<sub>leader</sub> that is modified to contain an N-terminal Cys was prepared by GenScript. One equivalent (5.0 mg) of the 85% pure peptide was dissolved in 1 mL reaction buffer [0.1 M phosphate pH 8.0, 10% (v/v) DMF, and 5.0 mg (6.3 eq) 5-iodoacetamide fluorescein (5-IAF)]. The mixture was allowed to react at room temperature in the dark for 2 h. Conjugation was verified via MALDI-TOF-MS by mixing 1  $\mu$ L of the reaction with 1  $\mu$ L of a saturated solution of CHCA in H<sub>2</sub>O:MeCN:FA 49.5:49.5:0.5 and analyzed the conjugated product ( $m/z$  3534.8 Da). The reaction was diluted to 5 mL with aqueous solution of 1% (v/v) FA and clarified by centrifugation. The supernatant was applied to a 200 mg HyperSep C18 cartridge equilibrated in 97:2:1 H<sub>2</sub>O:MeCN:FA. The resin was washed with 10 mL of the equilibration solution and the labeled peptide was eluted with 5 mL of 89:20:1 H<sub>2</sub>O:MeCN:FA. The eluent was dried under vacuum at room temperature. The solid was redissolved in 500  $\mu$ L of 97:2:1 H<sub>2</sub>O:MeCN:FA and clarified by centrifugation. The supernatant was injected into an Agilent 1200 HPLC system equipped with a 250  $\times$  10mm (5  $\mu$ m particle size, 100  $\text{\AA}$  pore size) C18 BetaSil column. Separation was performed at a flow rate of 4 mL/min and solvent phases composed of 99.9:0.1 H<sub>2</sub>O:FA (A) and 99.9:0.1 MeCN:FA (B). Separation was achieved by the following gradient run on an equilibrated stationary phase: 2–40% B over 20 min then 40–100% B over 5 min. Fractions containing FI-FusA<sub>leader</sub> were evaporated to dryness under vacuum. Solid was resuspended in MilliQ water and stored at -20°C. Labeled peptide was quantified by reading the absorbance at 392 nm of a solution of the labeled peptide in PBS and using  $\epsilon_{392} = 85,000 \text{ M}^{-1} \text{ cm}^{-1}$ .<sup>7</sup>

### Fluorescence Polarization (FP) Assays.

**Direct assays.** Interactions between fluorescently labeled FusA leader peptide (FI-FusA<sub>leader</sub>) and FusE variants were quantified using fluorescence polarization. Polarization signals were maximized by leaving FusE as an MBP-fusion. Two-fold serial dilutions of MBP-FusE were made in binding buffer (50 mM Tris pH 7.5, 500 mM NaCl, 2.5% glycerol, 50  $\mu$ M ZnSO<sub>4</sub>) and mixed with 25 nM FI-FusA<sub>leader</sub> in non-binding black polystyrene 384-well plates (Corning). Polarization measurements were taken with a FilterMax F5 multimode microplate reader (Molecular Devices) using  $\lambda_{\text{ex}} = 485 \text{ nm}$  and  $\lambda_{\text{em}} = 535 \text{ nm}$ . Data fitting was done by OriginPro using the dose-response curve fitting. The concentration of the titrant at the inflection point was recorded as  $K_D$ . All measurements were done in triplicate.

**Competition assays.** Interactions between FusE and variants of FusA<sub>leader</sub> were quantified by fluorescence polarization in a competition setting. In order to produce MBP-FusA<sub>leader</sub> variants, the first codon of the core region of FusA was changed to a stop codon (W1\*) with site-directed mutagenesis. Using this construct as template, mutations of interest were introduced in the leader region of FusA and the leader peptides were expressed and purified as an MBP fusion. All the conditions remain the same as (a), except all the wells were supplemented with 200 nM MBP-FusE and the titrant was changed to the MBP-FusA<sub>leader</sub> variant of interest. The concentration of the titrant at the inflection point was recorded as  $IC_{50}$ .

### Evaluation of threadedness

Biosynthetically reconstituted lasso peptides were concentrated and desalted by Zip Tip and eluted into 20  $\mu\text{L}$  MeCN. This suspension was evaporated to dryness under vacuum and resuspended in 50 ng/ $\mu\text{L}$  carboxypeptidase Y in 25 mM  $\text{NH}_4\text{HCO}_3$  pH 6.5. This mixture was briefly vortexed and allowed to react at room temperature for 18 h. Resulting peptidase mixtures were evaporated to dryness under vacuum and resuspended in 3  $\mu\text{L}$  saturated sinapinic acid in 3:7:0.1  $\text{H}_2\text{O}$ :MeCN:FA. The entire volume was spotted onto the MALDI target and analyzed by MALDI-TOF MS. For thermal unthreading assays, eluted lasso peptides were incubated at 95  $^\circ\text{C}$  for 2 h. This product was then treated as above.

### Hydrogen-deuterium exchange MS.

Hydrogen-deuterium exchange was performed using previously established methods.<sup>8</sup> Briefly, biosynthetically reconstituted fusilassin was concentrated and desalted by Zip Tip and eluted into 20  $\mu\text{L}$  acetonitrile. This suspension was evaporated to dryness under vacuum and resuspended in 10  $\mu\text{L}$  3:7  $\text{D}_2\text{O}$ :MeCN (25 mM  $\text{NH}_4\text{HCO}_3$ , pH 5.5). A standard solution of 25  $\mu\text{g}/\text{mL}$  synthetic FusA<sub>core</sub> was prepared identically to fusilassin. At indicated time points, 1.5  $\mu\text{L}$  aliquots were removed and quenched by spotting onto the MALDI target with 1.5  $\mu\text{L}$  saturated sinapinic acid in 3:7  $\text{D}_2\text{O}$ :MeCN + 0.1% formic acid (pH = 2). Samples were then analyzed by MALDI-TOF MS.

Given the large mass dispersions observed for deuterated masses of interest, centroid masses were calculated according to the following:

$$\sum_{i=1}^n x_i y_i + x_{i+1} y_{i+1} \dots + x_n y_n$$

Where  $x = m/z$  value of peak,  $y =$  area value of mass peak,  $i =$  first  $m/z$  value of peak cluster with a S/N ratio  $>2$  and  $n =$  last  $m/z$  value of peak cluster with S/N ratio  $>2$ . The centroid  $m/z$  of fusilassin (2270.2) or FusA<sub>core</sub> (2287.2) were subtracted from respective calculated centroid masses to determine the number of incorporated deuterons. This value was reported as a raw value or as a fraction of the maximal deuterium incorporation. Maximum deuterium number was calculated as the sum of all backbone amides, an exchangeable side chain protons, excluding side chains of Thr/Ser, Asp/Glu,  $\alpha\text{-NH}_3^+$  and the C-terminal carboxylate. Exclusions were based on established methods describing observable exchangeable protons.<sup>9</sup>

**Table S1:** Sequences of *Fus* biosynthetic genes for *E. coli* expression, empty vectors for heterologous expressions and the pACYCDuet vector. All sequences are provided 5' to 3'. Restriction sites for cloning are underlined and restriction enzymes are indicated in parentheses.

***FusA* (BamHI, NotI)**

GGATCCATGGAAAAGAAGAAGTACACCGCTCCGCAGCTCGCTAAGGTCGGCGAATTCAAGGAGGCCACCGGCTGGTACACCGC  
GGAATGGGGCCTCGAGCTGATCTTTCGTCTTCCCGCGCTTCATCTGAGCGGCCGC

***FusB* (HindIII, NotI)**

AAGCTTGATGAGCGAGAACGTAGTGCTGCAGCGCAGCAACGTGCGCCTGTCGTGGCGGACGAAGTGGGCGGCGCGCTGCGCGG  
TGGGAGCGGCCCGGCTCTGGGCCGCAAACCCCCGGAGCGGATCCGCGCTACCCTGCTGCGTCTCCGGGGCGAGGTGCGGCC  
GCCACCTACGAAGAGGCCAAAGCCGCCCCGGGACGCGGTGCTCGCGGTGAGCCTGCGCTGCGCCGGACTGCGGGCCTGCCTGCA  
GCGTTCGCTGGCTATCGCACTGCTGTGCCGGATGCGCGGCACCTGGGCCACCTGGTGTGTGGGGGTTCCCGCCGCCCGCGT  
TCATCGGACACGCCTGGGTGGAGGCCGAAGGACGCCTCGTGGAAGAAGGCGTCGGCTACGACTACTTCAGCCGTCTGATCACC  
GTGGACTGAGCGGCCGC

***FusC* (HindIII, NotI)**

AAGCTTGATGGTTCGGTTGCATCAGTCCTTACTTCGCTGTTTTCCCTGATAAAGGACGTTCTCGGGCAGGCAACCGACCGCCTTC  
CGGCAGCCCAGACGCTGGCGTCCCACCCTTCGGGACGCCCTTGGCTTGTAGGCGCGCTCCCCGCCGACCAGCTCCTGCTGGTC  
GAGGCCGGGAGCGCCGCTCGCCGTGATCGGACACTGTTTCGGCTGAGCCTGAGCGGCTGCGTGCAGGAACTCGCCAGATCGA  
CGACGTGGCCAGTTCGACCGCATCGCGCGCACCCCTGGACGGCAGCTTTCACCTGGTTCGTGGTTCGTGGCGACAGATGCGGA  
TCCAAGGAAGCGTGTCCGGGCTCCGCCGAGTCTTCCACGCCCACGTGCGTACAGCCCGAATCGCCGCGGACCGCTCCGACGTG  
CTCGCCGCGGTACTCGGCGTCTCCCCGACCCGGACGTGCTCGCGCTGCGGATGTTCAACGGCCTGCCCTACCCGCTCAGCGA  
GCTGCCCCCATGGCCCGGGTGGAGCACGTCCCCGCTGGCACTACCTCAGCCTCGGCTTGCATGACGGCCGCCACCGGGTTCG  
TCCAGTGGTGGCATCCCCCGGAAGCGGAACCTCGCCGTACCCGCCGAGCTCCCCTGCTGCGCACTGCCCTGGCCGGAGCCGTG  
GACACCCGCACCCGCGGTGGCGGAGTGGTTAGCGCCGACCTGTCCGGCGGGCTCGACTCCACTCCCCTCTGCGCCCTGGCCGC  
TCGCGGCCCGGCCAAAGTCGTGCGCCTGACCTTCAGCAGCGGCCTTGACACGGACGATGATCTCCGCTGGGCGAAGATCGCCC  
ACCAGTCCCTTCCCTCGGTGGAGCACGTGGTGTCTCCCCGAGGACATCCCCGGCTTCTACGCTGGCCCTCGACGGGGAGTTC  
CCCCGTGGTGGACGAACCGTCCGTGGCCATGTTGAGCACGCCGCGCATTCTGAGCCGGTGCACACGGCCCGCGCCACGGCTC  
CCGCTGCACATGGACCGCCTGGGCGGCGACCACTCCACGGATCGCTCAGCCTTACCACGATCTGCTCTGGCAGCGGC  
CGTGGACTGCCTTGGCGCTCATCCGCGGCCACCGCCTCCTGGCGGGACTGTGCTGTGAGAGACCTTCGCTTCGCTCGCTGAC  
CGCCGTGACCTCCGCGCATGGCTTGCCGATATCCGGCACTCCATCGCCACGGGAGAACC CGCGCCGCTCCCTGTTTCGGATG  
GGACGTCCTGCCCAAGTGCGGGCCGTGGCTGACCGCCGAGGCGCGGAGCGCGTGGTGGCCGCTTCGACGCGGTCTGGAGT  
CGCTGGAGCCTCTCGCCCCGACCCGAGGACAGGACGCTGACCTGGCCGCGATCCGCGCGGCCGCGACCTGCGACTGCTG  
CACCAGCTCGGCAGCAGCGACCTGCCCGCATGGAATCGCCGTTTCTCGACGACCGCGTGGTGGAGGCTGCCTTCAGGTGCG  
CCACGAAGGCCGGATGAACCCGTTTCAATTCAAGTCCCTCATGAAAACGGCCATGGCTTCCCTCCTCCCCGCGGAGTTCTTGA  
CCCGCCAGTCAAGACCGACGGCACTCCGCTCGCTGCGGAGGGGTTACCCGAACAACCGGATCGCATCATCCAGATATGGCGG  
GAGTCCCGACTGGCGGAACTGGGGCTCATCCACCCGACGTGCTCGTGGAAACGGGTCAAACAGCCCTACTCGTTCCGGGGCCC  
GGACTGGGGCATGGAGCTCACCCTCACCCTCGAGCTGTGGCTGCGGTCCCGCGAACGTGTCCTCCAAGGAGCAAACGGTGGAG  
ACAACAGGAGCTGAGCGGCCGC

***FusE* (BamHI, NotI)**

GGATCCATGGAGACAACAGGAGCTGAATTCGGGCTACGTCCCGAGATCTCAGTCGCGCAAACCGACTACGGCATGGTGTGCTGCT  
GGACGGCCGCGAGCGGTGAGTACTGGCAGCTCAACGACACCCGCGGCGCTGATCGTGCAGCGGCTGCTGGACGGGCACTCCCCCG  
CCGACGTGGCCAGTTCCTCACCAGCGAATACGAGGTGGAGCGGACCGACGCGGAACGCGACATCGCCGCGCTCGTCACCAGC  
CTGAAAGAGAACGGGATGGCGCTGCCATGCTGAGCGGCCGC

**pET28-MBP-Empty (MCS underlined)**

TGGCGAATGGGACGCGCCCTGTAGCGGCGCATTAAAGCGCGGGCGGGTGTGGTGGTTACGCGCAGCGTGACCGCTACACTTGCCA  
GCGCCCTAGCGCCCGCTCCTTTTCGCTTTCTTCCCTTCTTCTCGCCACGTTTCGCGGCTTTCCCGTCAAGCTCTAAATCGG  
GGGCTCCCTTTAGGTTCCGATTTAGTGCTTTACGGCACCTCGACCCAAAAAAGTTGATTAGGGTATGGTTACAGTAGTGG  
GCCATCGCCCTGATAGACGGTTTTTTCGCCCTTTGACGTTGGAGTCCACGTTCTTTAATAGTGGACTCTTGTTCAAAAGTGGAA  
CAACTCAACCTATCTCGGTCTATTCTTTTATTATAAGGGATTTTGGCGATTTTCGGCCTATTGGTTAAAAAATGAGCTG  
ATTTAACAATAAATTTAACGCGAATTTTAAACAAAATATTAACGTTTACAATTTTCAGGTGGCACTTTTCGGGAAATGTGCGCGG  
AACCCCTATTTGTTTTATTTTTCTAAATACATTCAAATATGTATCCGCTCATGAATTAATTTCTTAGAAAAACTCATCGAGCATC  
AAATGAAACTGCAATTTATTCATATCAGGATTATCAATACCATATTTTTGAAAAAGCCGTTTCTGTAATGAAGGAGAAAACTC  
ACCGAGGCGATTCATAGGATGGCAAGATCCTGGTATCGGTCTGCGATTCCGACTCGTCCAACATCAATACAACCTATTAATT  
TCCCCTCGTCAAAAATAAGGTTATCAAGTGAAGAAATCACCATGAGTGACGACTGAATCCGGTGGAGAAATGGCAAAAAGTTTATGC  
ATTTCTTTCCAGACTTGTTC AACAGGCCAGCCATTACGCTCGTCATCAAAATCACTCGCATCAACCAAACCGTTATTCATTCCG

TGATTGCGCCTGAGCGAGACGAAATACGCGATCGCTGTTAAAAGGACAATTACAAACAGGAATCGAATGCAACCGGCGCAGGA  
ACACTGCCAGCGCATCAACAATATTTTTACCTGAATCAGGATATTCTTCTAATACCTGGAATGCTGTTTTCCCGGGGATCGCA  
GTGGTGAGTAACCATGCATCATCAGGAGTACGGATAAAATGCTTGATGGTCGGAAGAGGCATAAAATCCGTCAGCCAGTTTGTAG  
TCTGACCATCTCATCTGTAACATCATTGGCAACGCTACCTTTGCCATGTTTTAGAAACAACCTCTGGCGCATCGGGCTTCCCAT  
ACAATCGATAGATTGTGCGACCTGATTGCCCCGACATTATCGCGAGCCATTTATACCCATATAAAATCAGCATCCATGTTGGAA  
TTTTAATCGCGGCCTAGAGCAAGACGTTTTCCCGTTGAATATGGCTCATAACACCCCTTGTATTACTGTTTTATGTAAGCAGACAG  
TTTTATTGTTTCATGACCAAAATCCCTTAACGTGAGTTTTTCGTTCCACTGAGCGTCAGACCCCGTAGAAAAGATCAAAGGATCT  
TCTTGAGATCCTTTTTTTCTGCGCGTAATCTGCTGCTTGCAAACAAAAAAACCACCGCTACCAGCGGTGGTTTTGTTTGCCGGA  
TCAAGAGCTACCAACTCTTTTTCCGAAGGTAACCTGGCTTCAGCAGAGCGCAGATAACCAATACTGTCCTTCTAGTGTAGCCGT  
AGTTAGGCCACCACTTCAAGAACTCTGTAGCACCAGCTACATACTCGCTCTGCTAATCCTGTTACCAGTGGCTGCTGCCAGT  
GGCGATAAGTCGTGCTTACCAGGTTGGACTCAAGACGATAGTTACCAGGATAAGGCGCAGCGGTGGGCTGAACGGGGGGTTC  
GTGCACACAGCCCAGCTTGGAGCGAACGACCTACACCGAACTGAGATACCTACAGCGTGAGCTATGAGAAAGCGCCACGCTTC  
CCGAAGGGGAGAAAGGCGGACAGGTATCCGGTAAGCGGCAGGGTCGGAACAGGAGAGCGCACGAGGGGAGCTTCCAGGGGGAAAC  
GCCTGGTATCTTTATAGTCTGTGCGGGTTTTCCGCACCTCTGACTTGAGCGTCGATTTTTGTGATGCTCGTCAGGGGGGCGGAG  
CCTATGGAAAACGCCAGCAACGCGGCCTTTTTACGGTTCCTGGCCTTTTGCTGGCCTTTTGCTCACATGTTCTTTCTGCGT  
TATCCCCTGATTCTGTGGATAACCGTATTACCAGCTTTGAGTGAGCTGATACCGCTCGCCGAGCCGAACGACCGAGCGCAGC  
GAGTCAGTGAGCGAGGAAGCGGAAGAGCGCCTGATGCGGTATTTTCTCCTTACGCATCTGTGCGGTATTTTACACCCGCATATA  
TGGTGCACCTCTCAGTACAATCTGCTCTGATGCCGCATAGTTAAGCCAGTATACACTCCGCTATCGCTACGTGACTGGGTCTATG  
GCTGCTCCCCGACCCCGCAACACCCGCTGACGCGCCCTGACGGGCTTGTCTGCTCCCGGCATCCGCTTACAGCAACAGTGT  
GACCGTCTCCGGGAGCTGCATGTGTGAGAGTTTTCCAGCTCATACCCGAAACCGCGAGGCAGCTCGGTTAAGCTCATCAG  
CGTGGTCTGAAGCGATTACAGATGTCTGCCTGTTTACATCCGCGTCCAGCTCGTTGAGTTTTCTCCAGAAGCGTTAATGTCTGG  
CTTCTGATAAAGCGGGCCATGTTAAGGGCGGTTTTTTCTGTTTGGTCACTGATGCCTCCGTGTAAGGGGGATTTCTGTTTCAT  
GGGGTAATGATACCGATGAAACGAGAGAGGATGCTCACGATACGGGTTACTGATGATGAACATGCCCGGTTACTGGAACGTT  
GTGAGGGTAAACAACCTGGCGGTATGGATGCGGCGGGACCAGAGAAAATCACTCAGGGTCAATGCCAGCGCTTCGTTAATACA  
GATGTAGGTGTTCCACAGGGTAGCCAGCAGCATCCTGCGATGCAGATCCGGAACATAATGGTGCAGGGCGCTGACTTCCGCGT  
TTCCAGACTTTACGAAACACGAAACCGAAGACCATTTCATGTTGTTGCTCAGGTGCGAGACGTTTTGCAGCAGCAGTCCGCTTC  
ACGTTTCGCTCGCGTATCGGTGATTTCATTCTGCTAACCCAGTAAGGCAACCCCGCCAGCCTAGCCGGGTCTCAACGACAGGAGC  
ACGATCATGCGCACCCGTGGGGCCGCCATGCCGGCGATAATGGCCTGCTTCTCGCCGAAACGTTTTGGTGGCGGGACCAGTGAC  
GAAGGCTTGAGCGAGGGCGTGCAAGATTCCGAATACCGCAAGCGACAGGCCGATCATCGTCGCGCTCCAGCGAAAGCGGTCTCT  
CGCCGAAAATGACCCAGAGCGCTGCCGGCACCTGTCTACGAGTTGCATGATAAAGAAGACAGTCATAAGTGGCGGACGATA  
GTCATGCCCCGCGCCACCAGGAGCTGACTGGGTTGAAGGCTCTCAAGGGCATCGGTGAGATCCCGGTGCCTAATGAGT  
GAGCTAACTTACATTAATTGCGTTGCGCTCACTGCCCGCTTTCCAGTCGGGAAACCTGTCTGTCGAGCTGCATTAATGAATCG  
GCCAACGCGCGGGGAGAGGCGGTTTTGCGTATTGGGCGCCAGGGTGGTTTTTTCTTTTACCAGTGAGACGGGCAACAGCTGATT  
GCCCTTACCAGCTGGCCCTGAGAGAGTTGCAGCAAGCGGTCCACGCTGGTTTTGCCCCAGCAGGCGAAAATCCTGTTTGATGG  
TGGTTAACGGCGGGATATAACATGAGCTGTCTTCGGTATCGTCGTATCCCACTACCGAGATATCCGCACCAACGCGCAGCCCG  
GACTCGGTAATGGCGCGCATTGCGCCCAGCGCCATCTGATCGTTGGCAACCAGCATCGCAGTGGGAACGATGCCCTCATTTCAG  
CATTGTCATGGTTTTGTTGAAAACCGGACATGGCAGCTCCAGTCGCTTCCCGTATCCGCTATCCGCTGAATTTGATTGCGAGTGA  
GATATTTATGCCAGCCAGCAGCAGCAGCAGCAGCAGCAGCAGCAGCAGCAGCAGCAGCAGCAGCAGCAGCAGCAGCAGCAGCAGC  
AATGCGACCAGATGCTCCAGCCCAGTCGCGTACCCTTTCATGGGAGAAAATAATACTGTTGATGGGTGTCTGGTCAGAGAC  
ATCAAGAAAATAACCCGGAACATTAGTGCAGGCAGCTTCCACAGCAATGGCATCCTGGTTCATCCAGCGGATAGTTAATGATCA  
GCCCCTGACGCGTTCGCGGAGAAGATTGTGCACCCGCGCTTTACAGGCTTCGACGCGCTTCGTTTCTACCATCGACACCACC  
ACGCTGGCACCCAGTTGATCGGCGCGAGATTTAATCGCCGCGACAATTTGCGACGCGCGCTGCAGGGCCAGACTGGAGGTGGC  
AACGCCAATCAGCAACGACTGTTTTGCCCGCCAGTTGTTGTGCCACGCGGTTGGGAATGTAATTCAGCTCCGCCATCGCCGCTT  
CCACTTTTTCCCGCTTTTTCGCAGAAACGTGGCTGGCCTGGTTACCACGCGGGAAACGGTCTGATAAGAGACACCGGCATAC  
TCTGCGACATCGTATAACGTTACTGGTTTTACATTCACCACCCTGAATTGACTCTCTTCCGGGCGCTATCATGCCATACCGCG  
AAAGGTTTTGCGCCATTTCGATGGTGTCCGGGATCTCGACGCTCTCCCTTATGCGACTCCTGCATTAGGAAGCAGCCCAGTAGT  
AGGTTGAGGCCGTTGAGCACCCGCCCGCAAGGAATGGTGCATGCAAGGAGATGGCGCCCAACAGTCCCCCGGCCACGGGGCC  
TGCCACCATAACCCAGCCGAAACAAGCGCTCATGAGCCCAGGAGTGGCGAGCCCGATCTTCCCATCGGTGATGTGCGCGATAT  
AGGCGCCAGCAACCGCACCTGTGGCGCCGGTATGCCGGCCACGATGCGTCCGGCGTAGAGGATCGAGATCTCGATCCCGCGA  
AATTAATACGACTCACTATAGGGGAATTGTGAGCGGATAACAATTTCCCTCTAGAAAATAATTTGTTTAACTTTAAGAAGGAG  
ATATACCATGGGCAGCAGCCATCATCATCATCACAGCAGCGGCCTGGTGCCGCGCGGCAGCCATATGAAAATCGAAGAAG  
GTAAACTGGTAATCTGGATTAACGGCGATAAAGGCTATAACGGTCTCGCTGAAGTCGGTAAGAAAATTCGAGAAAAGATACCGGA  
ATTAAGTACCGTTGAGCATCCGGATAAACTGGAAGAGAAAATTTCCACAGGTTGCGGCAACTGGCGATGGCCCTGACATTAT  
CTTCTGGGCACACGACCGCTTTGGTGGCTACGCTCAATCTGGCCTGTTGGCTGAAATCACCCCGGACAAAGCGTTCCAGGACA  
AGCTGTATCCGTTTACCTGGGATGCCGTACGTTACAACCGCAAGATGTTGCTTACCCGATCGCTGTTGAAGCGTTATCGCTG  
ATTTATAACAAAGATCTGCTGCCGAACCCGCAAAACCTGGGAAGAGATCCCGGCGCTGGATAAAGAACTGAAAGCGAAAGG  
TAAGAGCGCGTATGTTCAACCTGCAAGAACAACCTTACCTGGCCGCTGATTGCTGCTGACGGGGTTTATGCGTTCAAGT  
ATGAAAACGGCAAGTACGACATTAAGACGTGGGCGTGGATAACGCTGGCGCGAAAGCGGGTCTGACCTTCTGGTTGACCTG  
ATTAAAAACAAACACATGAATGCAGACACCGATTACTCCATCGCAGAAGCTGCCTTTAATAAAGGCGAAACAGCGATGACCAT  
CAACGGCCCCGTGGGCATGGTCCAACATCGACACCAGCAAAGTGAATTATGGTGTAAACGGTACTGCCGACCTTCAAGGGTCAAC

CATCCAAACCGTTTCGTTGGCGTGCTGAGCGCAGGTATTAACGCCGCCAGTCCGAACAAAGAGCTGGCGAAAGAGTTTCTCGAA  
AACTATCTGCTGACTGATGAAGGTCTGGAAGCGGTTAATAAAGACAAACCGCTGGGTGCCGTAGCGCTGAAGTCTTACGAGGA  
AGAGTTGGCGAAAGATCCACGTATTGCCGCCACCATGGAAAACGCCAGAAAGGTGAAATCATGCCGAACATCCCGCAGATGT  
CCGCTTTCTGGTATGCCGTGCGTACTGCGGTGATCAACGCCGCCAGCGGTCTGTGACTGTGATGAAGCCCTGAAAGACGCG  
CAGACTAATTCGAGCTCCCACCATCACCATCACCACGCGAATTCGGTACCGCTGGTTCGCGTGGATCTGAGAACCTGTACTT  
CCAATCCGGATCCCTCGAGTCGACAAGCTTGCGGCCGCACTCGAGCACCACCACCACCACCCTGAGATCCGGCTGCTAACAA  
AGCCCCGAAAGGAAGCTGAGTTGGCTGCTGCCACCGCTGAGCAATAACTAGCATAACCCTTGGGGCCTCTAAACGGGTCTTGA  
GGGTTTTTTTTGCTGAA

**pACYCDuet-FusC-FusEB**

GGGGAATTGTGAGCGGATAACAATTCCTGTAGAAATAATTTGTTAACTTTAATAAGGAGATATAACCATGGGCAGCAGCC  
ATCACCATCATCACCACAGCCAGGATCCGAATTCGAGCTCGGCGCGCCTGCAGGTCGACATGGTCGGTTGCATCAGTCCTTAC  
TTTCGCTGTTTTCCCTGATAAGGACGTTCTCGGGCAGGCAACCGACCGCTTCCGGCAGCCCAGACGCTGGCGTCCCACCCTTC  
GGGACGCCCTTGGCTTGTAGGCGCGCTCCCCGCCGACCAGCTCCTGCTGGTTCGAGGCCGGGGAGCGCCGCTCGCCGTGATCG  
GACTGTTTCGGCTGAGCCTGAGCGGCTGCGTGCAGGAACTCGCCAGATCGACGACGTGGCCAGTTCGACCGCATCGCGCGC  
ACCCTGGACGGCAGCTTTCACCTGGTCTGGTCTGTCGGCGACCAGATCGGGATCCAAGGAAGCGTGTCCGGGCTCCGCCGAGT  
CTTCCACGCCACGTCGGTACAGCCGAATCGCCGCGGACCCTCCGACGTGCTCGCCGCGGTAATCGGGCTCTCCCCGACC  
CGGACGTGCTCGCGCTGCGGATGTTCAACGGCCTGCCCTACCCGCTCAGCGAGCTGCCCCATGGCCCGGGGTGGAGCAGTC  
CCCGCCTGGCACTACCTCAGCCTCGGCTTGCATGACGGCCGCCACCGGTCGTCCAGTGGTGGCATCCCCGGAAGCGGAACT  
CGCCGTACCCGCCGACGCTCCCCTGCTGCGCACTGCCCTGGCCGGAGCCGTGGACACCCGCACCCGCGGTGGCGGAGTGGTTA  
GCGCCGACCTGTCCGGCGGGCTCGACTCCACTCCCCTCTGCGCCCTGGCCGCTCGCGGCCGGCCAAAGTCGTGCGCCTGACC  
TTCAGCAGCGGCCTTGACACGGACGATGATCTCCGCTGGCGAAGATCGCCACCACTCCTTCCCTCGGTGGAGCAGTGGT  
GCTCTCCCCGAGGACATCCCCGGCTTCTACGCTGGCCTCGACGGGGAGTTCCTTGGTGGACGAACCGTCCGTGGCCATGT  
TGAGCAGCCGCGCATTCTGAGCCGGCTGCACACGGCCCGCGCCACGGTCCCCTGCACATGGACGGCCTGGGCGGCGAC  
CAGCTCCTCACCAGGATCGCTCAGCCTCTACCACGATCTGCTCTGGCAGCGGCCGTGGACTGCCTTGGCGCTCATCCGCGGCCA  
CCGCTCCTGGCGGGACTGTGCTGTGAGAGACCTTCGCTTCGCTCGCTGACCGCCGTGACCTCCGCGCATGGCTTGCCGATA  
TCCGGCACTCCATCGCCACGGGAGAACCAGCCGCGCCGCTCCCTGTTCCGATGGGACGTCCTGCCCAAGTGGGGCCGTGGCTG  
ACCGCCGAGGCGCGGAGCGCGTGTGGCCCGCTTCGACGCGGTCCTGGAGTCGCTGGAGCCTCTCGCCCCGACCCGAGGCAG  
GCACGCTGACCTGGCCGCGATCCGCGCGGCGCCGCGACCTGCGACTGCTGCACCAGCTCGGCAGCAGCGACCTGCCCGCA  
TGGAATCGCCGTTCTCGACGACCGCGTGGTGGAGGCTGCCTTCAGGTGCGCCACGAAGGCCGGATGAACCCGTTTCAATTC  
AAGTCCCTCATGAAAACGGCCATGGCTTCCCTCCTCCCCGCGGAGTTCCTTGACCCGCCAGTCGAAGACCGACGGCACTCCGCT  
CGCTGCGGAGGGGTTACCAGAACACGCGATCGCATCATCCAGATATGGCGGGAGTCCCAGTGGCGGAACTGGGGCTCATCC  
ACCCGACGTGCTCGTGAACGGGTCAAACAGCCCTACTCGTTCGGGGCCCGGACTGGGGCATGGAGCTCACCTCACCGTC  
GAGCTGTGGCTGCGGTCCCGCGAACGTGCTCTCAAGGAGCAAACGGTGGAGACAACAGGAGCTGAGCGGCCGCATAATGCTT  
AAGTCGAACAGAAAGTAATCGTATTGTACACGGCCGCATAATCGAAATTAATACGACTCACTATAGGGGAATTTGTGAGCGGAT  
ACAATTCCTCATCTTAGTATATTAGTTAAGTATAAGAAGGAGATATACATATGGAGACAACAGGAGCTGAATTCGGGCTACGT  
CCCAGATCTCAGTCGCGCAAACCGACTACGGCATGGTGTGCTGCTGGACGGCCGACGCGGTGAGTACTGGCAGCTCAACGACAC  
CGCGGCGCTGATCGTGCAGCGGCTGCTGGACGGGCACTCCCCGCCGACGTCGGCCAGTTCCTCACAGCGAATACGAGGTGG  
AGCGGACCGACGCGGAACGCGACATCGCCGCGCTCGTACCAGCTGAAAGAGAACGGGATGGCGCTGCCATGCTGATTAGTT  
AAGTATAAGAAGGAGATATACATATGAGCGAGAACGTAGTGTGACGCGCAGCAACGTCGCGCTGTGCTGGCGGACGAAGTGG  
GCGGCGGCTGCGCGGTGGGACGCGCCGGCTCTGGCCGCAAACCCCGGAGCGGATCCGCGCTACCTCTCGCTGCGCTCCG  
GGCGAGGTGCGGCCCGCACCTACGAAGAGGCCAAAGCCGCGGGACGCGGTGCTCGCGGTGAGCCTGCGCTGCGCCGGAC  
TGCGGGCCTGCCTGCAGCGTTCGCTGGCTATCGCACTGCTGTGCCGATGCGCGGCACCTGGGCCACCTGGTGTGTGGGGTT  
CCCCGCCGCCCGCTTCATCGGACACGCTGGGTGGAGGCCGAAGGACGCTCGTGGAAGAAGGCGTGGCTACGACTACTT  
CAGCCGTCTGATCACCCTGGACTGAATGGCAGATCTCAATTGGATATCGGCCGGCCACGCGATCGCTGACGTCGGTACCCTCG  
AGTCTGGTAAAGAAACCGCTGCTGCGAAATTTGAACGCCAGCAGCATGGACTCGTCTACTAGCGCAGCTTAATTAACCTAGGCT  
GCTGCCACCGCTGAGCAATAACTAGCATAACCCTTGGGGCCTCTAAACGGGTCTTGGGGGTTTTTTGCTGAAACCTCAGGC  
ATTTGAGAAGCACACGGTCACACTGCTTCCGGTAGTCAATAAACCGGTAAACCAGCAATAGACATAAGCGGCTATTTAACGAC  
CCTGCCCTGAACCGACGACCGGGTCAATTTGCTTTTCAATTTCTGCCATTTCATCCGCTTATTATCACTTATTTCAGGCGTAGC  
ACCAGGCGTTTAAAGGACCAATAACTGCCTTAAAAAATTACGCCCCGCCCTGCCACTCATCGCAGTACTGTTGTAATTCAT  
TAAGCATTCTGCCGACATGGAAGCCATCACAGACGGCATGATGAACCTGAATCGCCAGCGGCATCAGCACCTTGTGCGCTTGC  
GTATAATATTTGCCCATAGTGAAAACGGGGGCGAAGAAGTTGTCCATATTTGGCCACGTTTAAATCAAAACTGGTGAACCTCAC  
CCAGGGATTGGCTGAGACGAAAACATATTCTCAATAAACCTTTAGGGAAATAGGCCAGGTTTTTACCAGTAAACGCCCACAT  
CTTGCGAATATATGTGTAGAAACTGCCGAAATCGTCTGGTATTCACTCCAGAGCGATGAAAACGTTTTCAGTTTGTCTATGG  
AAAACGGTGAACAAGGGTGAACACTATCCCATATCACCAGCTCACCGTCTTTCATTGCCATACGGAACCTCCGGATGAGCATT  
CATCAGGCGGGCAAGAATGTGAATAAAGGCCGGATAAAAATTGTGCTTATTTTTCTTTACGGTCTTTAAAAAGGCCGTAATAT  
CCAGCTGAACGGTCTGGTTATAGGTACATTGAGCAACTGACTGAAATGCCTCAAAATGTTCTTTACGATGCCATTGGGATATA  
TCAACGGTGGTATATCCAGTGATTTTTTTCTCCATTTTAGCTTCTTAGCTCCTGAAAATCTCGATAACTCAAAAAATACGCC  
CGGTAGTGATCTTATTTTATTATGGTGAAGTTGGAACCTCTTACGTGCCGATCAACGTCTCATTTTTCGCCAAAAGTTGGCCC  
AGGGCTTCCCGGTATCAACAGGGACACCAGGATTTATTTATTTCTGCGAAGTGATCTTCCGTACAGGATTTTATTCGGCGCAA

AGTGC GTCGGGTGATGCTGCCAACTTACTGATTTAGTGTATGATGGTGTTTTTGAGGTGCTCCAGTGGCTTCTGTTTTCTATCA  
GCTGTCCCTCCTGTTT CAGCTACTGACGGGGTGGT GCGTAACGGCAAAGCACCGCCGGACATCAGCGCTAGCGGAGTGTATAC  
TGGCTTACTATGTTGGCACTGATGAGGGTGT CAGTGAAGTGCTTCATGTGGCAGGAGAAAAAGGCTGCACCGGTGCGTCAGC  
AGAATATGTGATACAGGATATATTCCGCTTCCTCGCTCACTGACTCGCTACGCTCGGTTCGACTGCGGGCAGCGGAAATG  
GCTTACGAACGGGGCGGAGATTTCTGGAAGATGCCAGGAAGATACTTAACAGGGAAGTGAGAGGGCCGCGGCAAAGCCGTTT  
TTCCATAGGCTCCGCCCCCTGACAAGCATCACGAAATCTGACGCTCAAATCAGTGGTGGCGAAACCCGACAGGACTATAAAG  
ATACCAGGCGTTTTCCCTGGCGGCTCCCTCGT GCGCTCTCCTGTTCTGCTTTTCGGTTTACCGGTGTCATTCCGCTGTTATG  
GCCGCGTTTTGTCTCATTCCACGCCTGACACTCAGTTCCGGGTAGGCAGTTTCGCTCCAAGCTGGACTGTATGCACGAACCCCC  
GTTT CAGTCCGACCGCTGCGCCTTATCCGGTAACTATCGTCTTGAGTCCAACCCGGAAAGACATGCAAAGCACC ACTGGCAGC  
AGCCACTGGTAATTGATTTAGAGGAGTTAGTCTTGAAGTCATGCGCCGGTTAAGGCTAAACTGAAAGGACAAGTTTTGGTGAC  
TGCGCTCCTCCAAGCCAGTTACCTCGGTTCAAAGAGTTGGTAGCTCAGAGAACCTTCGAAAAACCGCCCTGCAAGGCGGTTTT  
TTCGTTTTT CAGAGCAAGAGATTACGCGCAGACCAAACGATCTCAAGAAGATCATCTTATTAATCAGATAAAAATATTTCTAGA  
TTTT CAGTGCAATTTATCTCTTCAAATGTAGCACCTGAAGTCAGCCCCATACGATATAAGTTGTAATTTCTCATGTTAGTCATGC  
CCCCGCGCCACCGGAAGGAGCTGACTGGGTTGAAGGCTCTCAAGGGCATCGGTTCGAGATCCCGGTGCCTAATGAGTGAGCTAA  
CTTACATTAATTGCGTTGCGCTCACTGCCCCTTTCCAGTCGGGAAACCTGTGCTGCCAGCTGCATTAATGAATCGGCCAACG  
CGCGGGGAGAGGCGGTTTTGCGTATTGGGCGCCAGGGTGGTTTTTCTTTTACCAGTGAGACGGGCAACAGCTGATTGCCCTTC  
ACCGCCTGGCCCTGAGAGAGTTGCAGCAAGCGGTCCACGCTGGTTTGCCCCAGCAGGCGAAAATCCTGTTTGATGGTGGTTAA  
CGGCGGGATATAACATGAGCTGTCTTCGGTATCGTTCGTATCCC ACTACCGAGATGTCCGCACCAACGCGCAGCCCGGACTCGG  
TAATGGCGCGCATTGCGCCCAGCGCCATCTGATCGTTGGCAACCAGCATCGCAGTGGGAACGATGCCCTCATT CAGCATTTGC  
ATGGTTTTGTTGAAAACCGGACATGGCACTCCAGTCGCCTTCCCGTTCCGCTATCGGCTGAATTTGATTGCGAGTGAGATATTT  
ATGCCAGCCAGCCAGACGCAGACGCGCCGAGACAGAACTTAATGGGCCCGCTAACAGCGCGATTTGCTGGTGACCCAATGCGA  
CCAGATGCTCCACGCCCAGTCGCGTACCGTCTTCATGGGAGAAAATAATACTGTTGATGGGTGTCTGGTCAGAGACATCAAGA  
AATAACGCCCGAACATTAGTGCAGGCAGCTTCCACAGCAATGGCATCCTGGTCATCCAGCGGATAGTTAATGATCAGCCCACT  
GACGCGTTGCGCGAGAAGATTGTGCACCGCCGCTTTACAGGCTTCGACGCGCTTCGTTCTACCATCGACACCACCACGCTGG  
CACCCAGTTGATCGGCGCGAGATTTAATCGCCGCGACAATTTGCGACGGCGCGTGCAGGGCCAGACTGGAGGTGGCAACGCCA  
ATCAGCAACGACTGTTTGCCCCCAGTTGTTGTGCCACGCGGTTGGGAATGTAATTCAGCTCCGCCATCGCCGCTTCCACTTT  
TTCCCGCGTTTTTTCGAGAAACGTGGCTGGCTGGTTTACCACGCGGGAAACGGTCTGATAAGAGACACCGGCATACTCTGCGA  
CATCGTATAACGTTACTGGTTTTACATTACCACCCTGAATTGACTCTCTTCCGGGCGCTATCATGCCATACCGCGAAAGGTT  
TTGCGCCATTTCGATGGTGTCCGGGATCTCGACGCTCTCCCTTATGCGACTCCTGCATTAGGAAATTAATACGACTCACTATA

**Table S2:** Oligonucleotide primers used in this study. All sequences are provided 5' to 3'. The suffices “f” and “r” indicate a forward or reverse primer, respectively. LP, leader peptide. CP, core peptide. SLIM, site-directed ligation-independent mutagenesis.

| Primer Name                       | Oligonucleotide Sequence                           |
|-----------------------------------|----------------------------------------------------|
| MBP-f (sequencing)                | GAGGAAGAGTTGGCGAAAGATCCACGTA                       |
| T7-r (sequencing)                 | GCTAGTTATTGCTCAGCGG                                |
| FusC_1 (sequencing)               | TGGAACGGGTCAAACAG                                  |
| FusA_BamHI-f                      | AAAGGATCCATGGAAAAGAAGAAGTACACCGCTCCG               |
| FusA_NotI-r                       | AAAGCGGCCGCTCAGATGAAGCGCGGAAGAC                    |
| FusE_BamHI-f                      | AAAGGATCCATGGAGACAACAGGAGCTGAATCCGG                |
| FusE_NotI-r                       | AAAGCGGCCGCTCATGGCAGCGCCATCCCG                     |
| FusB_HindIII-f                    | AAAAAGCTTGATGAGCGAGAACGTAGTGCTGC                   |
| FusB_NotI-r                       | AAAGCGGCCGCTCAGTCCACGGTGATCAGACGG                  |
| FusC_HindIII-f                    | AAAAAGCTTGATGGTCGGTTGCATCAGTCTTACTTC               |
| FusC_NotI-r                       | AAAGCGGCCGCTCAGCTCCTGTTGTCTCCACCG                  |
| FusCEB_BamHI-f (Gibson Assembly)  | CCATCACCATCATCACCACAGCCAGGATCCAATGGTCGGTTGCATCAG   |
| FusCEB_NotI-r (Gibson Assembly)   | CTTCTGTTTCGACTTAAGCATTATGCGGCCGCTCAGTCCACGGTGATCAG |
| FusB-C79A-f                       | GCCCTGCAGCGTTTCGCTGGCTATCGCACTG                    |
| FusB-C79A-r                       | GGCCCGCAGTCCGGCGCAGCG                              |
| FusB-H112A-f                      | GCCGCTGGGTGGAGGCCGAAGG                             |
| FusB-H112A-r                      | TCCGATGAACGGCGGGCGGC                               |
| FusC-D238A-f                      | GCCTCCACTCCCCTCTGCGCCCTGG                          |
| FusC-D238A-r                      | GAGCCCGCCGGACAGGTCGG                               |
| FusC-D340A-f                      | GCCCAGTCTCTCACCAGGATCGCTCAG                        |
| FusC-D340A-r                      | GCCGCCAGGCCGTCCATGTG                               |
| FusA_Core_1_Mutant_Screen-r       | GCCGGTGGCCTCCTTGAATTCGCCGACCT                      |
| FusA-W1F-f                        | AGGAGGCCACCGGCTTCTACACCGCGGAATGGGGCC               |
| FusA-W1L-f                        | AGGAGGCCACCGGCTTCTACACCGCGGAATGGGGCC               |
| FusA-W1A-f                        | AGGAGGCCACCGGCGCTACACCGCGGAATGGGGCC                |
| FusA-W1P-f                        | AGGAGGCCACCGGCCGCTACACCGCGGAATGGGGCC               |
| FusA-W1K-f                        | AGGAGGCCACCGGCAAATACACCGCGGAATGGGGCC               |
| FusA-W1H-f                        | AGGAGGCCACCGGCCACTACACCGCGGAATGGGGCC               |
| FusA-W1Y-f                        | AGGAGGCCACCGGCTATTACACCGCGGAATGGGGCC               |
| FusA-W1E_SLIM-r                   | TTCGCCGTGGCCTCCTTGAATTCGCCG                        |
| FusA_SLIM-r                       | GCCGGTGGCCTCCTTGAATTCGCCG                          |
| FusA-W1E_SLIM-f                   | GAATACACCGCGGAATGGGGCCTCGAGC                       |
| FusA_SLIM-f                       | TACACCGCGGAATGGGGCCTCGAGC                          |
| pET28-MBP-FusA(LP)-CitA(CP)_ins-r | ACGAGACGGTCTGTCCTCAGCAAGAACTAAGCGGCCGCACTCGAGCACCA |
| pET28-MBP-FusA(LP)-CitA(CP)_ins-f | AACGACCGTCTGTCCTCAGCAAGAACTAAGCGGCCGCACTCGAGCACCA  |
| pET28-MBP-FusA(LP)-CitA(CP)_D8E-r | GACGAGACGCTCGTTGCCCGCCAGGCCAGCAG                   |
| pET28-MBP-FusA(LP)-CitA(CP)_D8E-f | CGAGCGTCTGTCCTCAGCAAGAACTAAGCGGCCGCG               |
| FusA(LP)-CitA(CP)-r               | GCCGGTGGCCTCCTTGAATTCGCCGACCT                      |
| pET28-MBP-FusA(LP)-CitA(CP)_L1W   | AAGGAGGCCACCGGCTGGCTGGGCTGGCGGGCAA                 |



|                                      |                                                   |
|--------------------------------------|---------------------------------------------------|
| pET28-MBP-FusA(LP)-CitA(CP)_Ring+1-f | AGGCCACCGGCTGGCTGGGCCTGGCGCGGGCAACGAGCGTCTCGTCCTC |
| pET28-MBP-FusA(LP)-CitA(CP)_Ring-1-f | GGAGGCCACCGGCTGGCTGGGCCTGGGCAACGAGCGTCTCGT        |
| pET28-MBP-FusA(Ring+0)-r             | GAGGCCCCATTCCGCGGTGTACCAGCCGGTGGCCT               |
| pET28-MBP-FusA(Ring+1)-r             | GAGGCCCCATTCCGCCGCGGTGTACCAGCCGG                  |
| pET28-MBP-FusA(Ring-1)-r             | GAGGCCCCATTCCGCGGTGTACCAGCCGGTGGCCTCC             |
| pET28-MBP-FusA(Ring-2)-r             | GAGGCCCCATTCCGTACCAGCCGGTGGCCTCCTTG               |
| pET28-MBP-FusA_Core_L10*-f           | CCCGGAATGGGGCCTCGAGTGAATCTTCGTCTTCCCGCGCTTC       |
| pET28-MBP-FusA_Core_R16*-f           | GGAATGGGGCCTCGAGCTGATCTTCGTCTTCCCGTATTTCATCTGAGCG |
| pET28-MBP-FusA_RingEx_E-f            | GAATGGGGCCTCGAGCTGATCTTCGTCTTCCCGCGCTTCATC        |
| pET28-MBP-FusA_RingEx_D-f            | GAATGGGGCCTCGATCTGATCTTCGTCTTCCCGCGCTTCATC        |
| pET28-MBP-FusA-I40G-f                | CCCGCGCTTCGGTTGAGCGGCCACT                         |
| pET28-MBP-FusA-I40G-r                | ACCGAAGCGCGGAAGACGAAGATCAGCT                      |
| pET28-MBP-FusA-F39G-f                | CCCGCGCGGTATCTGAGCGGCCACTCG                       |
| pET28-MBP-FusA-F39G-r                | ATACCGCGCGGAAGACGAAGATCAGCTCGAGGC                 |
| FusA-T-2A-r                          | GGCTCCTTGAATTCGCCGACCTTAGCG                       |
| FusA-T(-2)A W1*-f                    | GCCGGCTGATACCCGCGGAATGGGG                         |
| FusA-K(-10)-r                        | AGCGAGCTGCGGAGCGGTG                               |
| FusA-K(-10)A-f                       | GCGGTGCGCGAATTCGAAGGAGCCAC                        |
| FusA-K(-10)E-f                       | GAGGTGCGCGAATTCGAAGGAGGC                          |
| FusA-L(-12)-r                        | CTGCGGAGCGGTGTACTTCTTCTTTCC                       |
| FusA-L(-12)M-f                       | ATGGCTAAGGTGCGCGAATTCGAAGGAGGC                    |
| FusA-L(-12)A-f                       | GCCGCTAAGGTGCGCGAATTCGAAGGAGG                     |
| FusA-W1*-f                           | GGCCACCGGCTGATACCCGCGG                            |
| FusA-W1-r                            | TCCTTGAATTCGCCGACCTTAGCGAGCTG                     |
| FusA-P(-14)-r                        | AGCGGTGTACTTCTTCTTTCCATGGATCCG                    |
| FusA-P(-14)A-f                       | GCGCAGCTCGCTAAGGTGCGG                             |
| FusA-P(-14)L-f                       | CTGCAGCTCGCTAAGGTGCGG                             |
| FusA-Y(-17)-r                        | CTTCTTCTTTTCCATGGATCCGATTGGAAG                    |
| FusA-Y(-17)A-f                       | GCCACCGCTCCGAGCTCGC                               |
| FusA-Y(-17)D-f                       | GACACCGCTCCGAGCTCGC                               |
| FusB-C79A-f                          | GCCCTGCAGCGTTGCTGGCTATCGCACTG                     |
| FusB-C79A-r                          | GGCCCGCAGTCCGGCGCAGCG                             |
| FusB-E116A-f                         | GCGGCCGAAGGACGCCTCGTG                             |
| FusB-E116A-r                         | CACCCAGGCGTGTCCGATGAAC                            |
| FusB-E123A-f                         | GCAGAAGGCGTCGGCTACGACTACTTC                       |
| FusB-E123A-r                         | CACGAGGCGTCTTCGGCC                                |
| FusB-E124A-f                         | GCAGGCGTCGGCTACGACTACTTCAG                        |
| FusB-E124A-r                         | TTCCACGAGGCGTCTTCGGC                              |
| FusB-H112A-f                         | GCCGCTGGGTGGAGGCCGAAGG                            |
| FusB-H112A-r                         | TCCGATGAACGGCGGGCGGC                              |
| FusB-W114A-f                         | GCGGTGGAGCCGAAGGACGCC                             |

|              |                             |
|--------------|-----------------------------|
| FusB-W114A-r | GGCGTGTCCGATGAACGGCG        |
| FusC-D238A-f | GCCTCCACTCCCCTCTGCGCCCTGG   |
| FusC-D238A-r | GAGCCCGCCGGACAGGTCGG        |
| FusC-D340A-f | GCCCAGTCTCTCACC GGATCGCTCAG |
| FusC-D340A-r | GCCGCCAGGCCGTCCATGTG        |
| FusC-G336A-f | GCCCTGGGCGGCGACCAGCTCCTC    |
| FusC-G336A-r | GTCCATGTGCAGGCGGGAGCCG      |
| FusC-S234A-f | GCCGGCGGGCTCGACTCCACTC      |
| FusC-S234A-r | CAGGTCGGCGCTAACC ACTCCG     |
| FusC-S239A-f | GCCACTCCCCTCTGCGCCCTGG      |
| FusC-S239A-r | GTGAGCCCGCCGGACAGGTC        |
| FusE-D74-r   | GCGTTCGCGTCCGTCCG           |
| FusE-D74A-f  | GCCATCGCCGCGCTCGTCACC       |
| FusE-E32-r   | ACCGCTGCGGCGGTCC            |
| FusE-E32A-f  | GCGTACTGGCAGCTCAACGACCCGC   |
| FusE-E32K-f  | AAGTACTGGCAGCTCAACGACCCGC   |
| FusE-E63-r   | AACTGGGCCACGTCCGGC          |
| FusE-E63A-f  | CCTCACCAGCGACTACGAGGTGGAG   |
| FusE-E63K-f  | CCTCACCAGCAAGTACGAGGTGGAGCG |
| FusE-G31-r   | GCTGCGGCCGTCCAG             |
| FusE-G31A-f  | GCTGAGTACTGGCAGCTCAACG      |
| FusE-G31V-f  | GTTGAGTACTGGCAGCTCAACG      |
| FusE-L26-r   | CAGCACCATGCCGTAGTCG         |
| FusE-L26A-f  | GCGGACGGCCGCAGC             |
| FusE-L78A-f  | GCCGTCAACCAGCCTGAAAGAGAACGG |
| FusE-L78P-f  | CCCGTCAACCAGCCTGAAAGAGAACGG |
| FusE-L78-r   | CGCGGCGATGTCGCGTTCC         |
| FusE-M87-r   | CCCGTTCTCTTTCAGGCTGGTGACG   |
| FusE-M87A-f  | GCGGCGCTGCCATGAGCGGC        |
| FusE-M87L-f  | CTGGCGCTGCCATGAGCGGC        |
| FusE-V24-r   | CATGCCGTAGTCGGTTTGCGC       |
| FusE-V24A-f  | GCCCTGTCTGGACGGCCGCAGC      |
| FusE-Y33-r   | CTCACCGCTGCGGCCGTC          |
| FusE-Y33A-f  | GCCTGGCAGCTCAACGACCCGCG     |

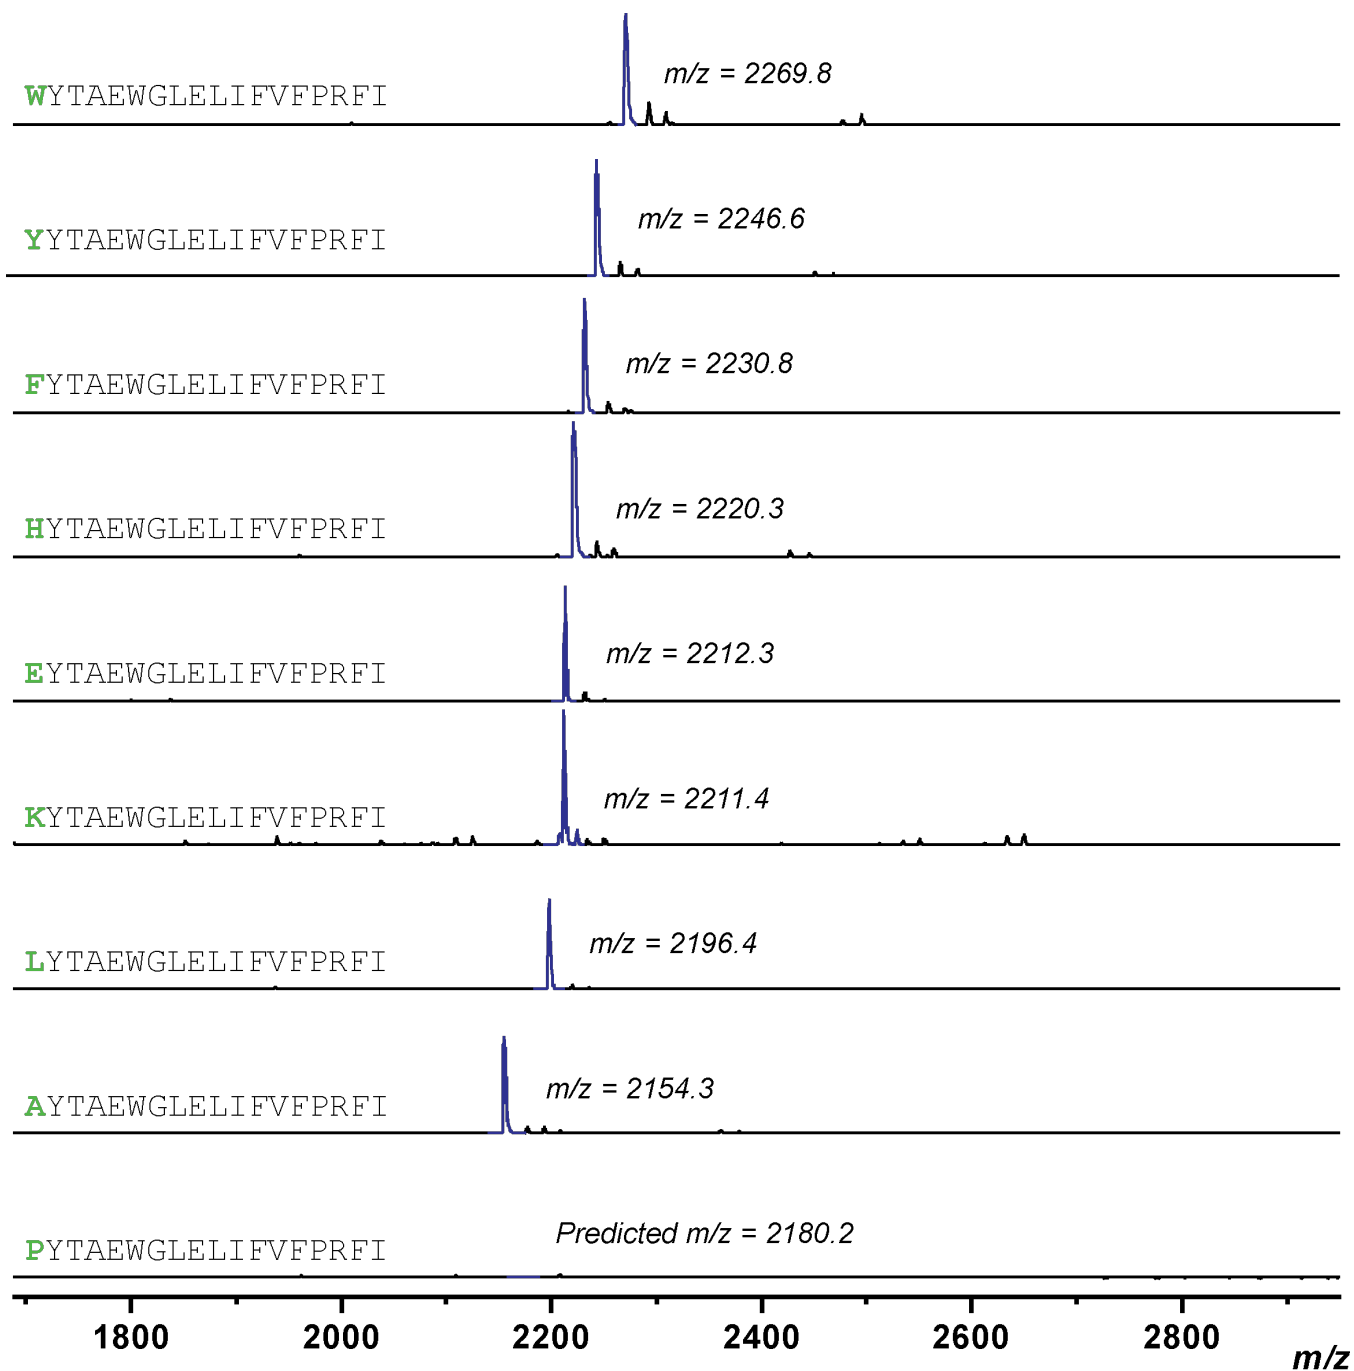

**Figure S1. MALDI-TOF-MS of methanolic extracts of heterologously produced wild-type fusilassin and core position 1 variants.** Precursor peptides were co-expressed with a pACYC-Duet vector FusB, FusC, and FusE. Crude methanolic extracts were analyzed by MALDI-TOF MS and masses corresponding to mature, cyclized products are indicated in blue. Only the W1P variant failed to generate a lasso peptide product.

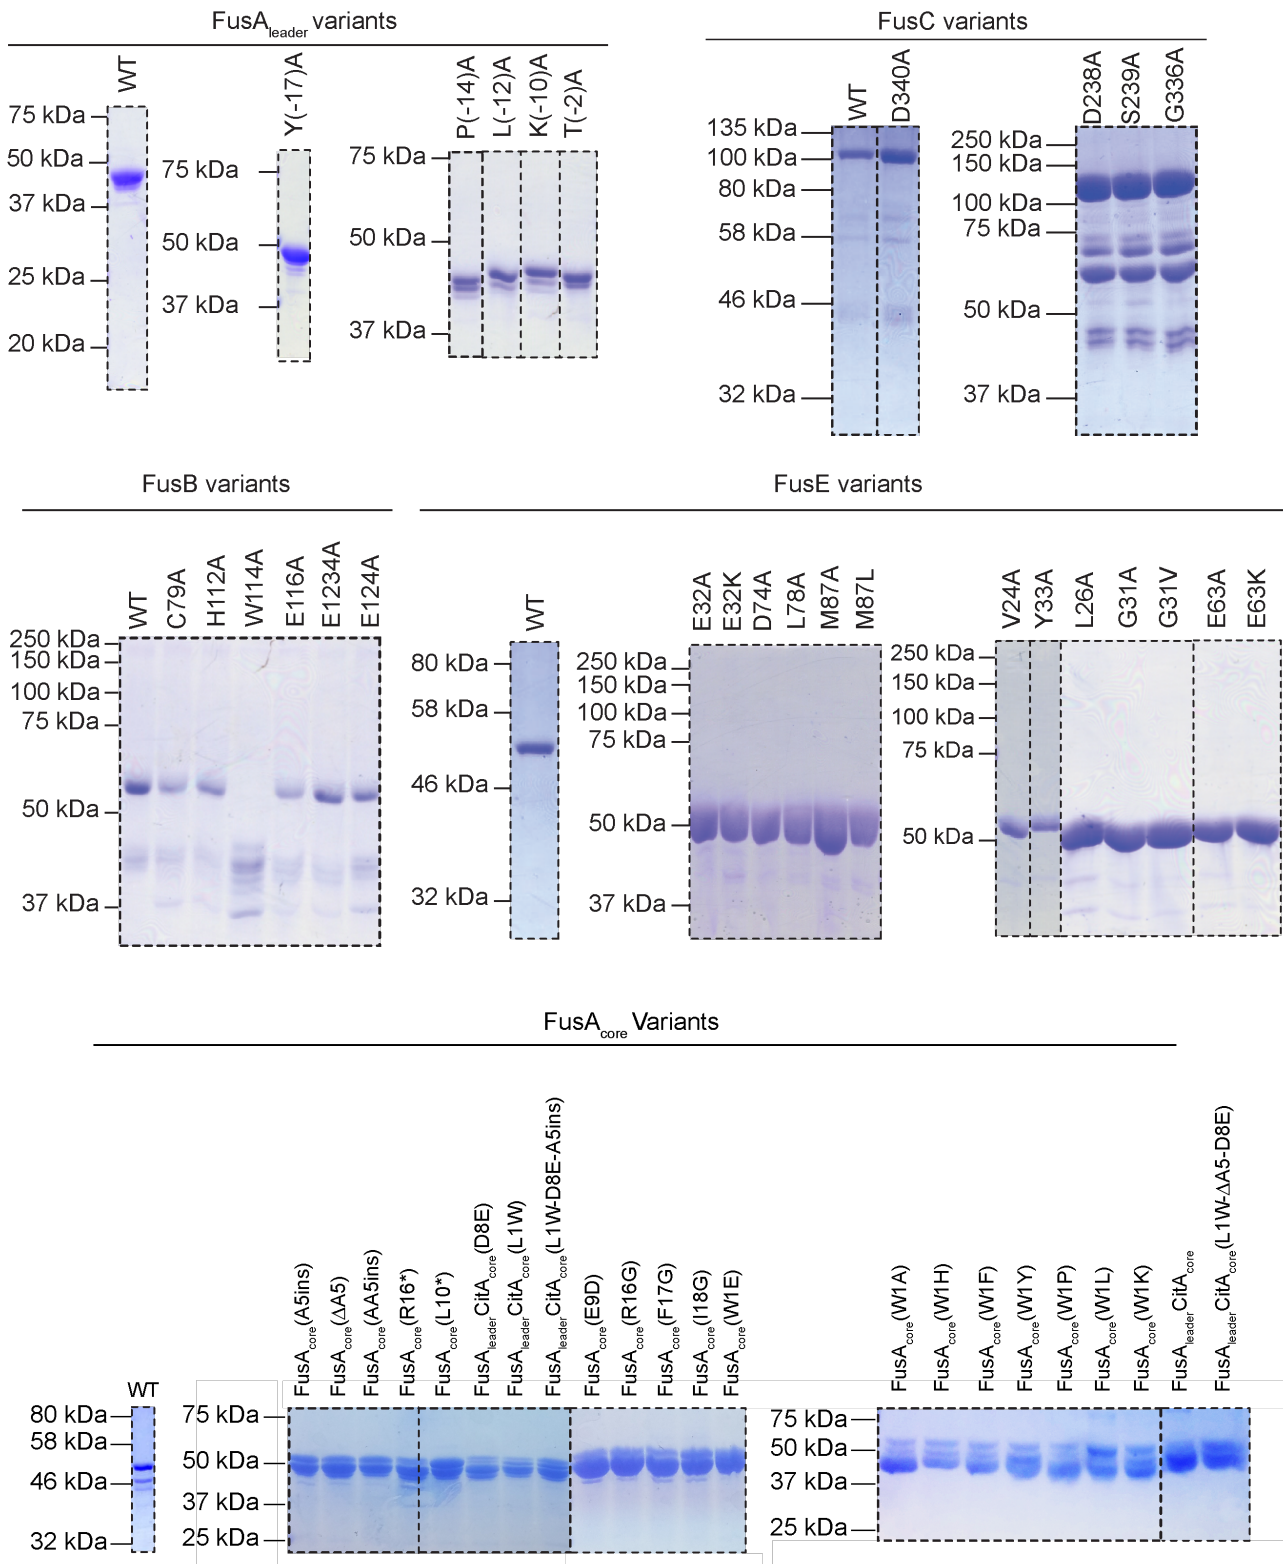

**Figure S2. SDS-PAGE analysis of proteins used in this study.** Images were merged and cropped for brevity – cropped and trimmed edges are indicated by dashed lines.

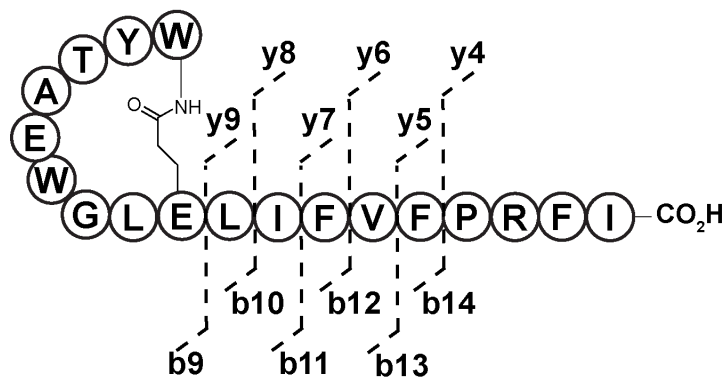

| Species              | Predicted mass | Observed mass | Error (ppm) |
|----------------------|----------------|---------------|-------------|
| [M+2H] <sup>2+</sup> | 1135.5976      | 1135.5960     | 1.4         |
| b9                   | 1118.4942      | 1118.4923     | 1.7         |
| b10                  | 1231.5782      | 1231.5763     | 1.6         |
| b11                  | 1344.6623      | 1344.6598     | 1.9         |
| b12                  | 1491.7307      | 1491.7286     | 1.4         |
| b13                  | 1590.7991      | 1590.7966     | 1.6         |
| b14                  | 1737.8675      | 1737.8646     | 1.7         |
| y4                   | 532.3242       | 532.3234      | 1.5         |
| y5                   | 679.3926       | 679.3917      | 1.4         |
| y6                   | 778.4610       | 778.4598      | 1.5         |
| y7                   | 925.5294       | 925.5279      | 1.7         |
| y8                   | 1038.6135      | 1038.6114     | 2.0         |
| y9                   | 1151.6976      | 1151.6958     | 1.5         |

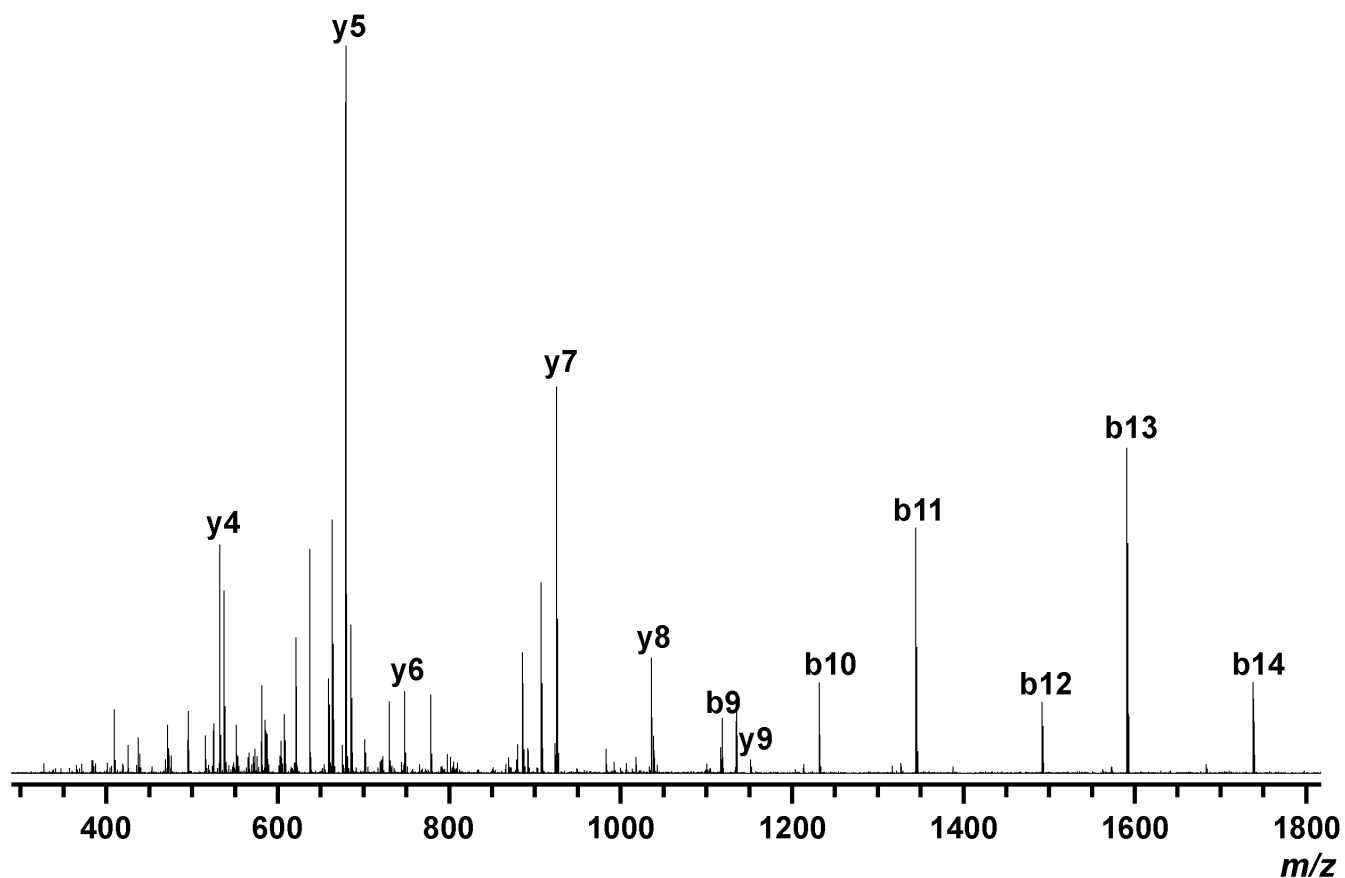

**Figure S3. HR-ESI-MS/MS of biosynthetically reconstituted fusilassin.** Fusilassin was subjected to collision-induced dissociation, resulting in a series of b<sup>+</sup> and y<sup>+</sup> ions consistent with a macrolactam linkage between Trp1 and Glu9 of the fusilassin core peptide.

| B protein accession   | Organism                                    | Lasso peptide  |
|-----------------------|---------------------------------------------|----------------|
| WP_011291590.1 (FusB) | <i>Thermobifida fusca</i>                   | fusilassin     |
| WP_040732796.1        | <i>Paenibacillus dendritiformis</i> C454    | paeninodin     |
| BAL72549.1            | <i>Rhodococcus jostii</i>                   | lariat         |
| EWS93467.1            | <i>Streptomyces filamentosus</i> NRRL 11379 | SRO15-2005     |
| KIH99639.1            | <i>Streptomonospora alba</i>                | streptomonicin |
| WP_031079704.1        | <i>Streptomyces</i> sp. NRRL S-118          | lagmysin       |
| OAL15485.1            | <i>Streptomyces albulus</i> NRRL B-3066     | citrulassin A  |
| WP_052021341.1        | <i>Actinokineospora spheciospongiae</i>     | actinokineosin |
| WP_017534153.1        | <i>Nocardiosis alba</i> DSM 43377           | LP2006         |
| WP_078648027.1        | <i>Streptomyces leeuwenhoekii</i>           | chaxapeptin    |
| EDY58509.1            | <i>Streptomyces sviceus</i> ATCC 29083      | sviceucin      |
| WP_014140854.1        | <i>Streptomyces cattleya</i> NRRL 8057      | moomysin       |

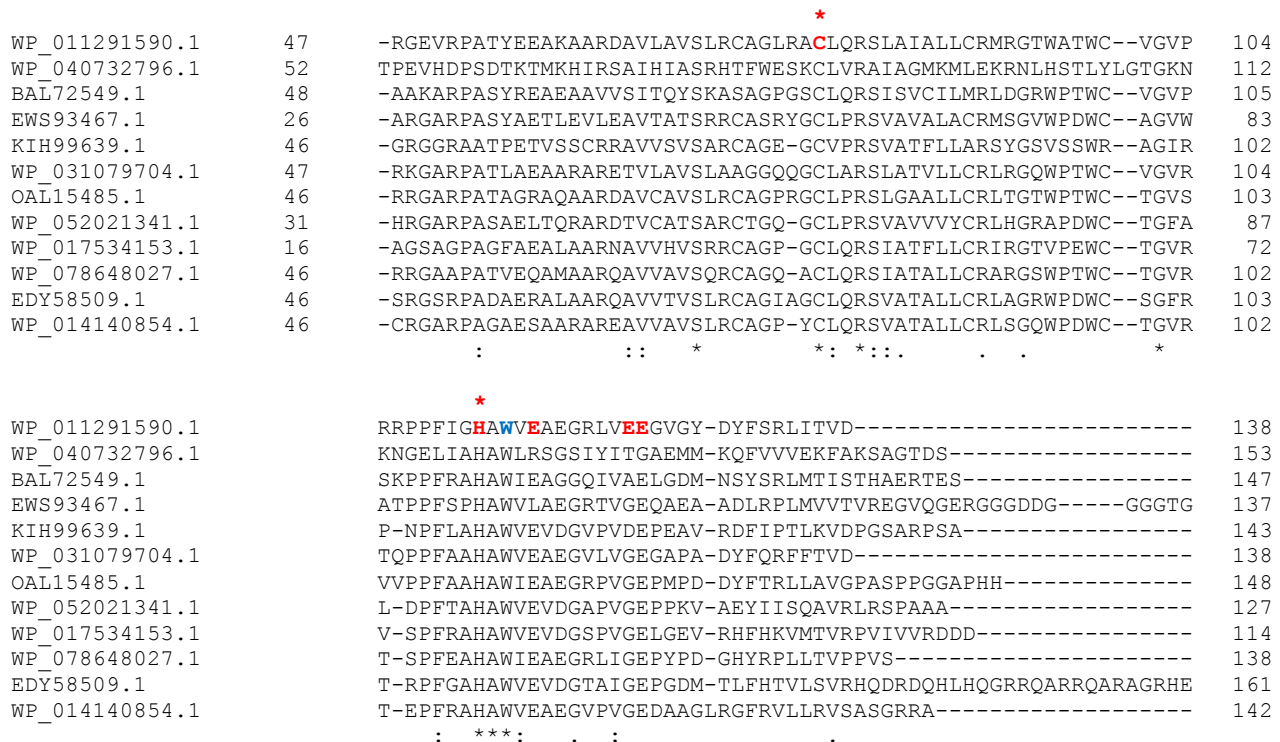

**Figure S4. Sequence alignment of various discrete leader peptidases.** A multiple sequence alignment of 12 discrete leader peptidases was generated using the Clustal Omega<sup>4</sup> web tool (<https://www.ebi.ac.uk/Tools/msa/clustalo/>) with the default parameters. Residues marked with a red asterisk were probed by mutagenesis owing to their potential role in catalysis (see Fig. S5 for MALDI-TOF-MS characterization). FusB-W114A (blue position) caused severe degradation in the protein after purification from *E. coli* (See Fig. S2).

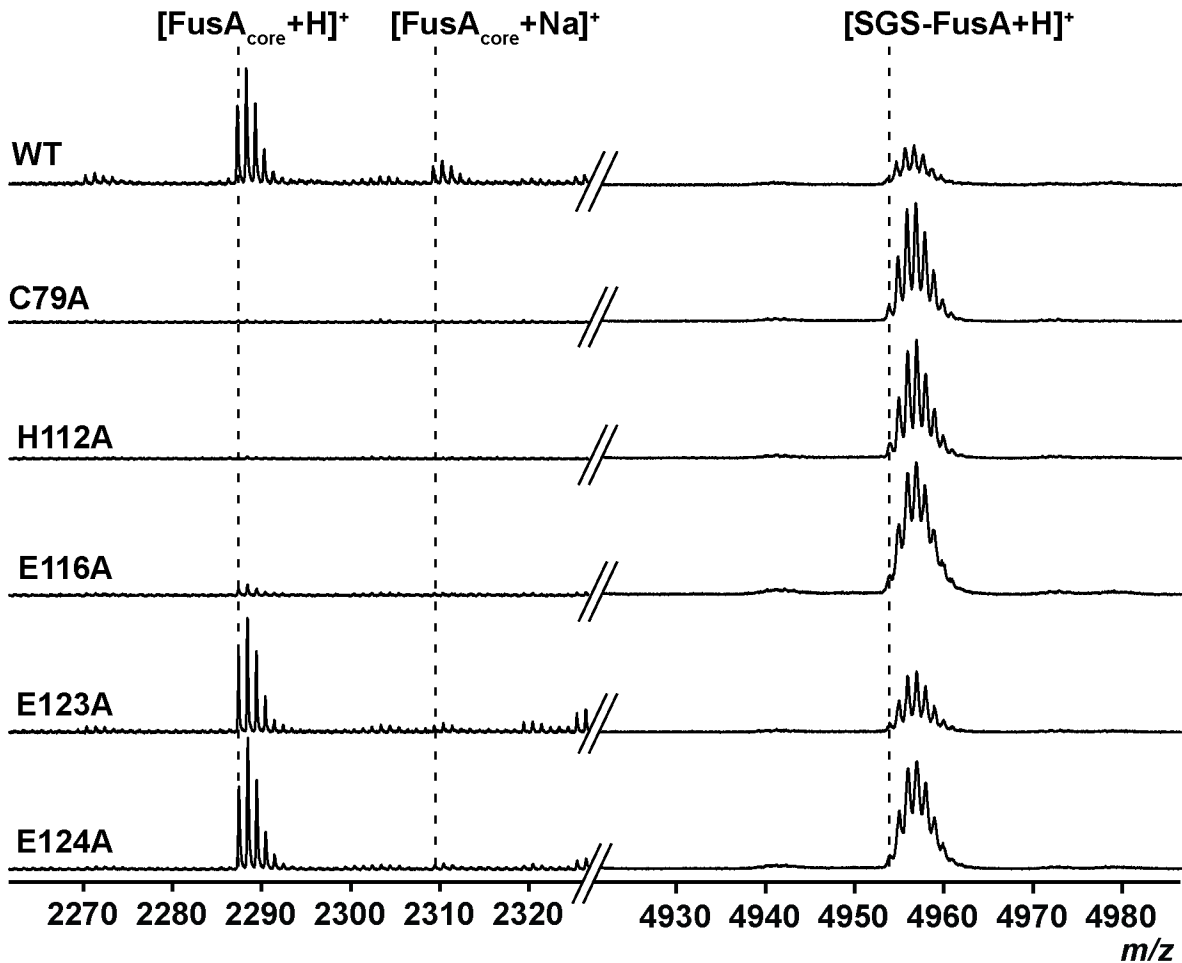

**Figure S5. MALDI-TOF-MS characterization of FusB variants.** Ala point substitutions of FusB were assayed for *in vitro* leader peptidase activity. The two predicted catalytic variants, C79A and H112A, are devoid of leader peptidase activity. The FusB-E116A variant displays considerable catalytic impairment while the other two variants, E123A and E124A, retain wild-type-like activity as observed by end-point assay. The “SGS” sequence remains on the N-terminus of the FusA precursor peptide as a result of cloning and TEV protease processing.

| C protein accession   | Organism                                    | Lasso peptide  |
|-----------------------|---------------------------------------------|----------------|
| WP_104612995.1 (FusC) | <i>Thermobifida fusca</i>                   | fusilassin     |
| WP_006678396.1        | <i>Paenibacillus dendritiformis</i> C454    | paeninodin     |
| BAL72547.1            | <i>Rhodococcus jostii</i>                   | lariatatin     |
| EWS93465.1            | <i>Streptomyces filamentosus</i> NRRL 11379 | SRO15-2005     |
| KIH99641.1            | <i>Streptomonospora alba</i>                | streptomomicin |
| WP_052411817.1        | <i>Streptomyces</i> sp. NRRL S-118          | lagmysin       |
| WP_003988505.1        | <i>Streptomyces albulus</i> NRRL B-3066     | citrulassin A  |
| WP_035284309.1        | <i>Actinokineospora spheciospongiae</i>     | actinokineosin |
| WP_017534152.1        | <i>Nocardiosis alba</i> DSM 43377           | LP2006         |
| WP_047121368.1        | <i>Streptomyces leeuwenhoekii</i>           | chaxapeptin    |
| EDY58507.2            | <i>Streptomyces sviveus</i> ATCC 29083      | sviveucin      |
| WP_014140852.1        | <i>Streptomyces cattleya</i> NRRL 8057      | moomysin       |

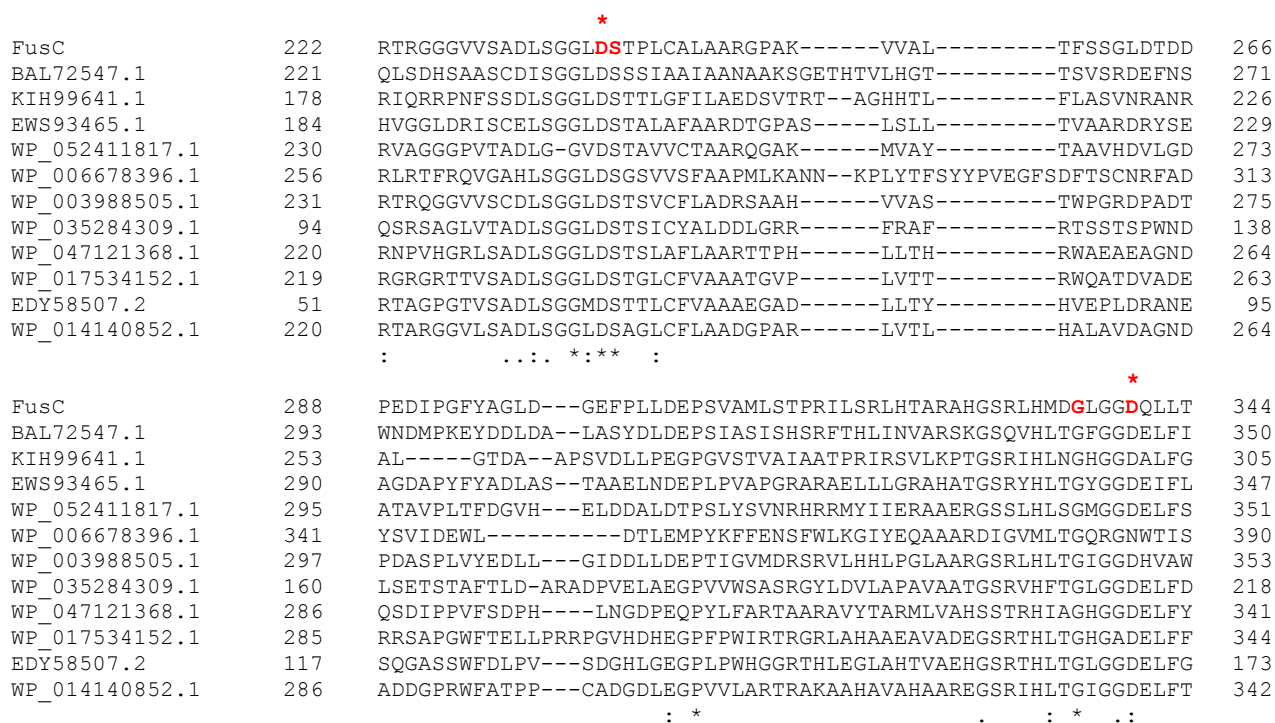

**Figure S6. Sequence alignment of various lasso cyclases.** A multiple sequence alignment of 12 lasso cyclases was generated using the Clustal Omega web tool (<https://www.ebi.ac.uk/Tools/msa/clustalo/>) with the default parameters. Predicted ATP-binding residues probed by mutagenesis. The Asp residues also denoted with red asterisk were devoid of catalytic activity (see Fig. S7 for MALDI-TOF-MS characterization).



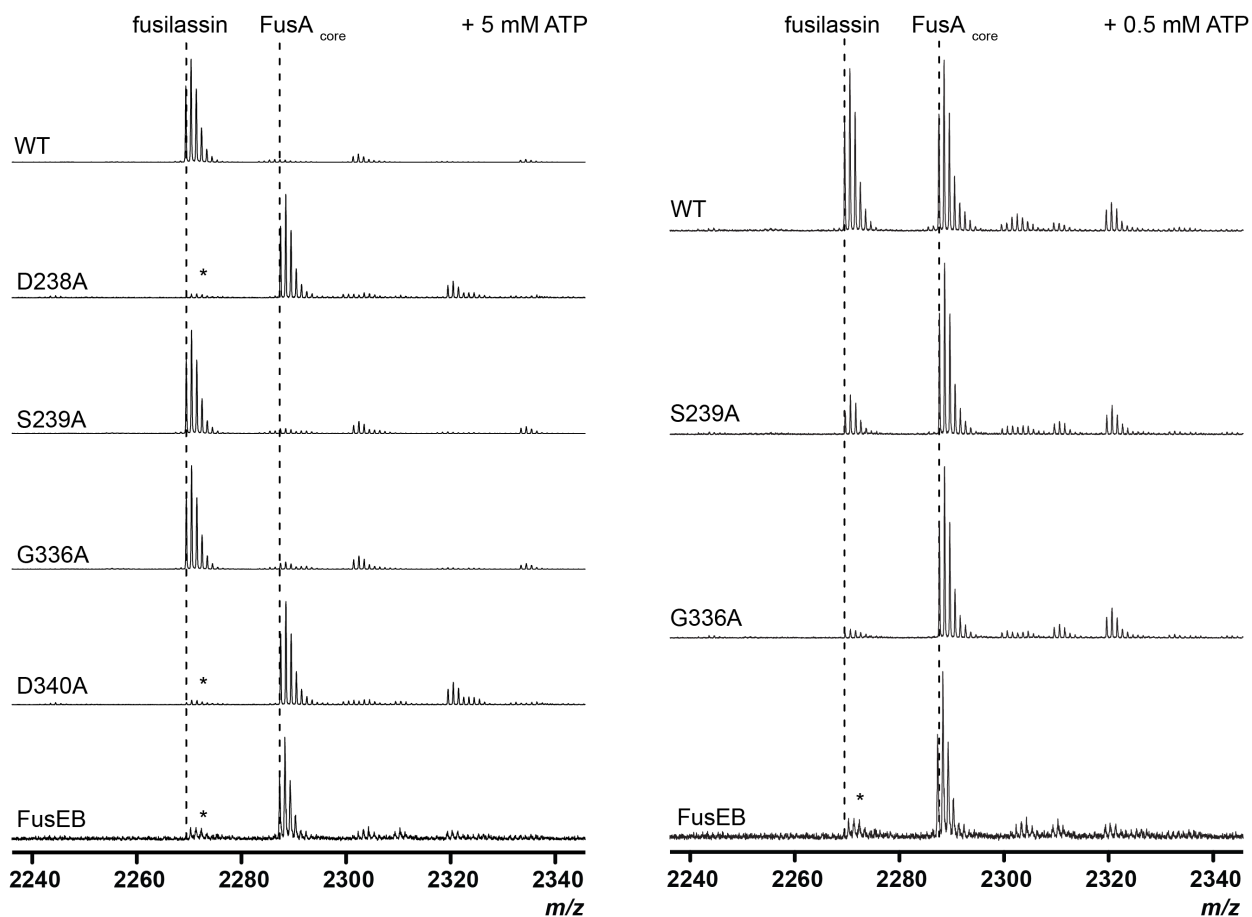

**Figure S7. MALDI-TOF-MS characterization of FusC variants.** Ala-substituted variants of FusC were assayed for *in vitro* lasso cyclase activity. FusC-D238A and -D340A were devoid of activity at 5 mM ATP concentration (*left*), while FusC-S239A and -G336A exhibited diminished turnover only at a reduced (500  $\mu$ M) ATP concentration (*right*). The very low intensity mass marked with an asterisk in the FusB + FusE only controls (FusEB) and D238A and D340A samples is an unrelated contaminant (the observed mass is 0.7 Da distinct from fusilassin).

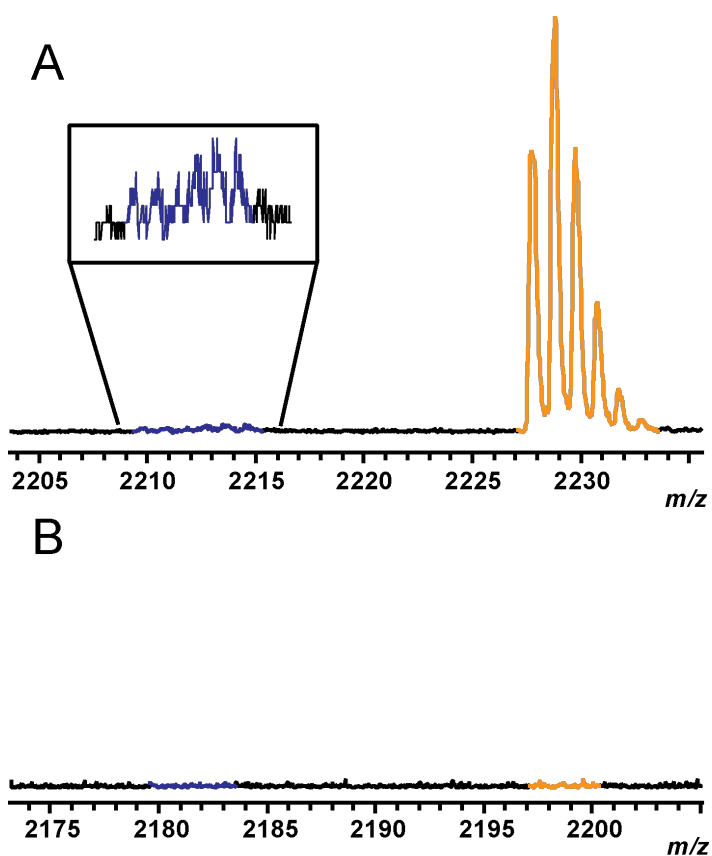

**Figure S8. MALDI-TOF MS analysis of biosynthetic reconstitution of FusA variants.** Expansion of the region corresponding to the linear (orange) and cyclized (blue) peptides. A peak consistent with the dehydrated form of FusA-W1E was observed at the limit of detection, as shown in the inset (A). FusA-W1P failed to generate linear core or the mature lasso peptide within the limit of detection (B).

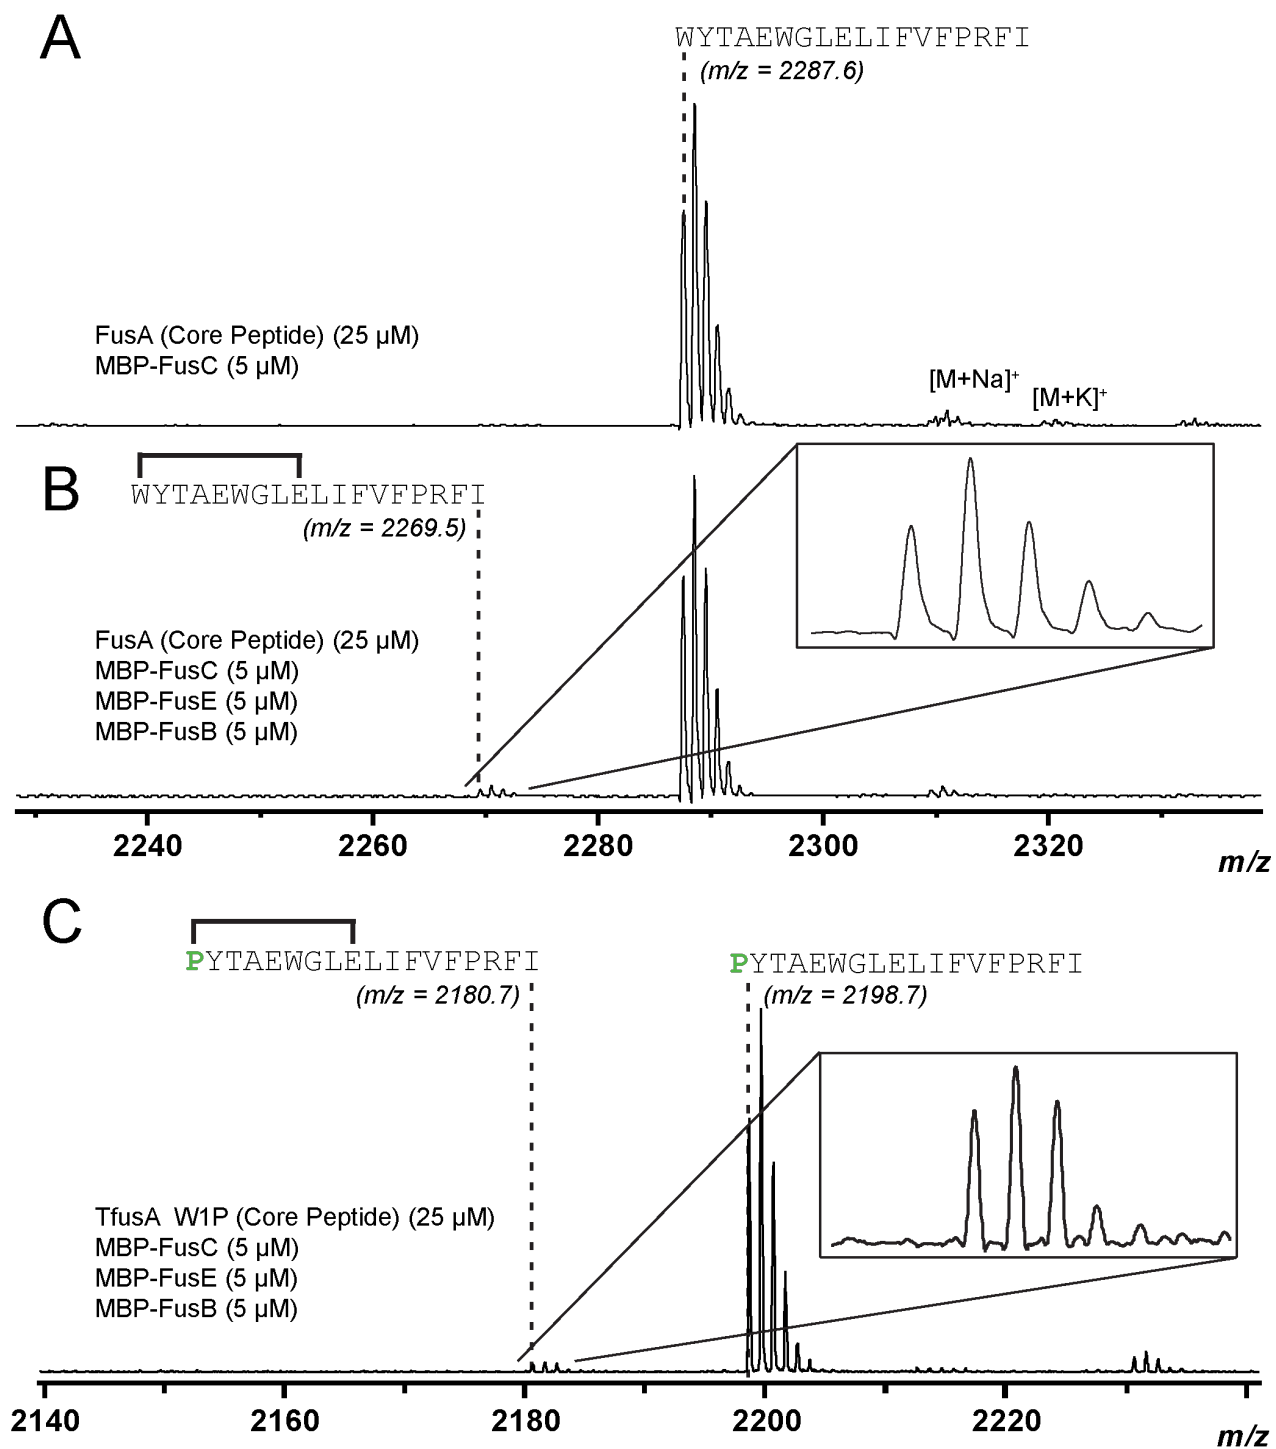

**Figure S9. Biosynthetic reconstitution of synthetic core peptides.** A synthetic core peptide that lacked the leader region of the native precursor peptide were not accepted as a substrate by FusC (A). Addition of FusB and FusE to the reaction led to a low but detectable amount of product formation. These data demonstrate that the leader region of the precursor peptide is critical for efficient processing by FusC (B). Same as panel B but synthetic FusA-W1P core peptide was employed as the substrate (C). Thus, FusC can tolerate a Pro1 variant of FusA. Insets are provided for low intensity peaks.

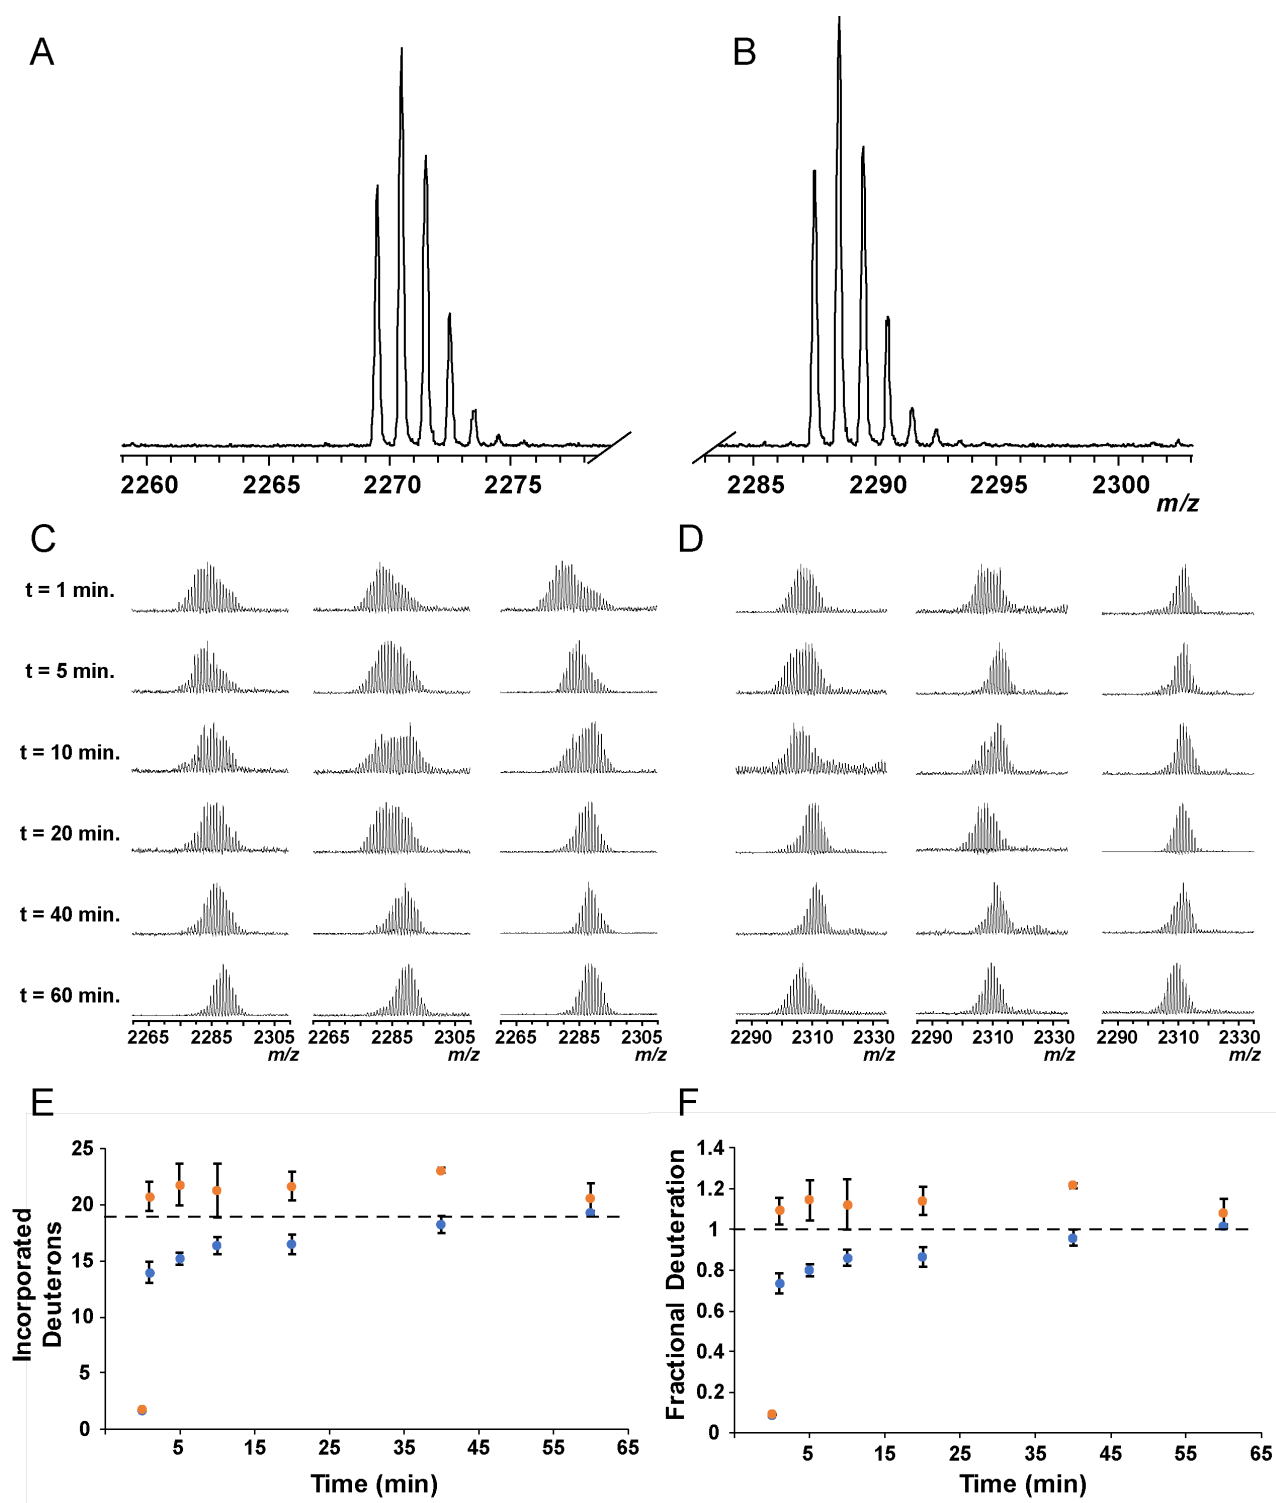

**Figure S10. Hydrogen-deuterium exchange of biosynthetically reconstituted fusilassin.** Centroid masses for natural abundance fusilassin (A) and linear core peptide (B) were calculated as described in methods and were used as single points for  $t=0$ . Raw data for fusilassin and linear core peptide deuteration vs. time was used to calculate centroid masses as described in methods (C and D, respectively). Full deuteration of the linear core peptide (orange circles) occurred within 1 min. Partial deuteration of fusilassin (blue circles) occurred rapidly, but the remaining exchangeable positions required an 1 h to reach the same level the control (E). Fractional deuteration rates are shown in (F) and support a threaded topology for fusilassin. Maximum fusilassin deuteration is indicated by the dotted line (panels E, F).

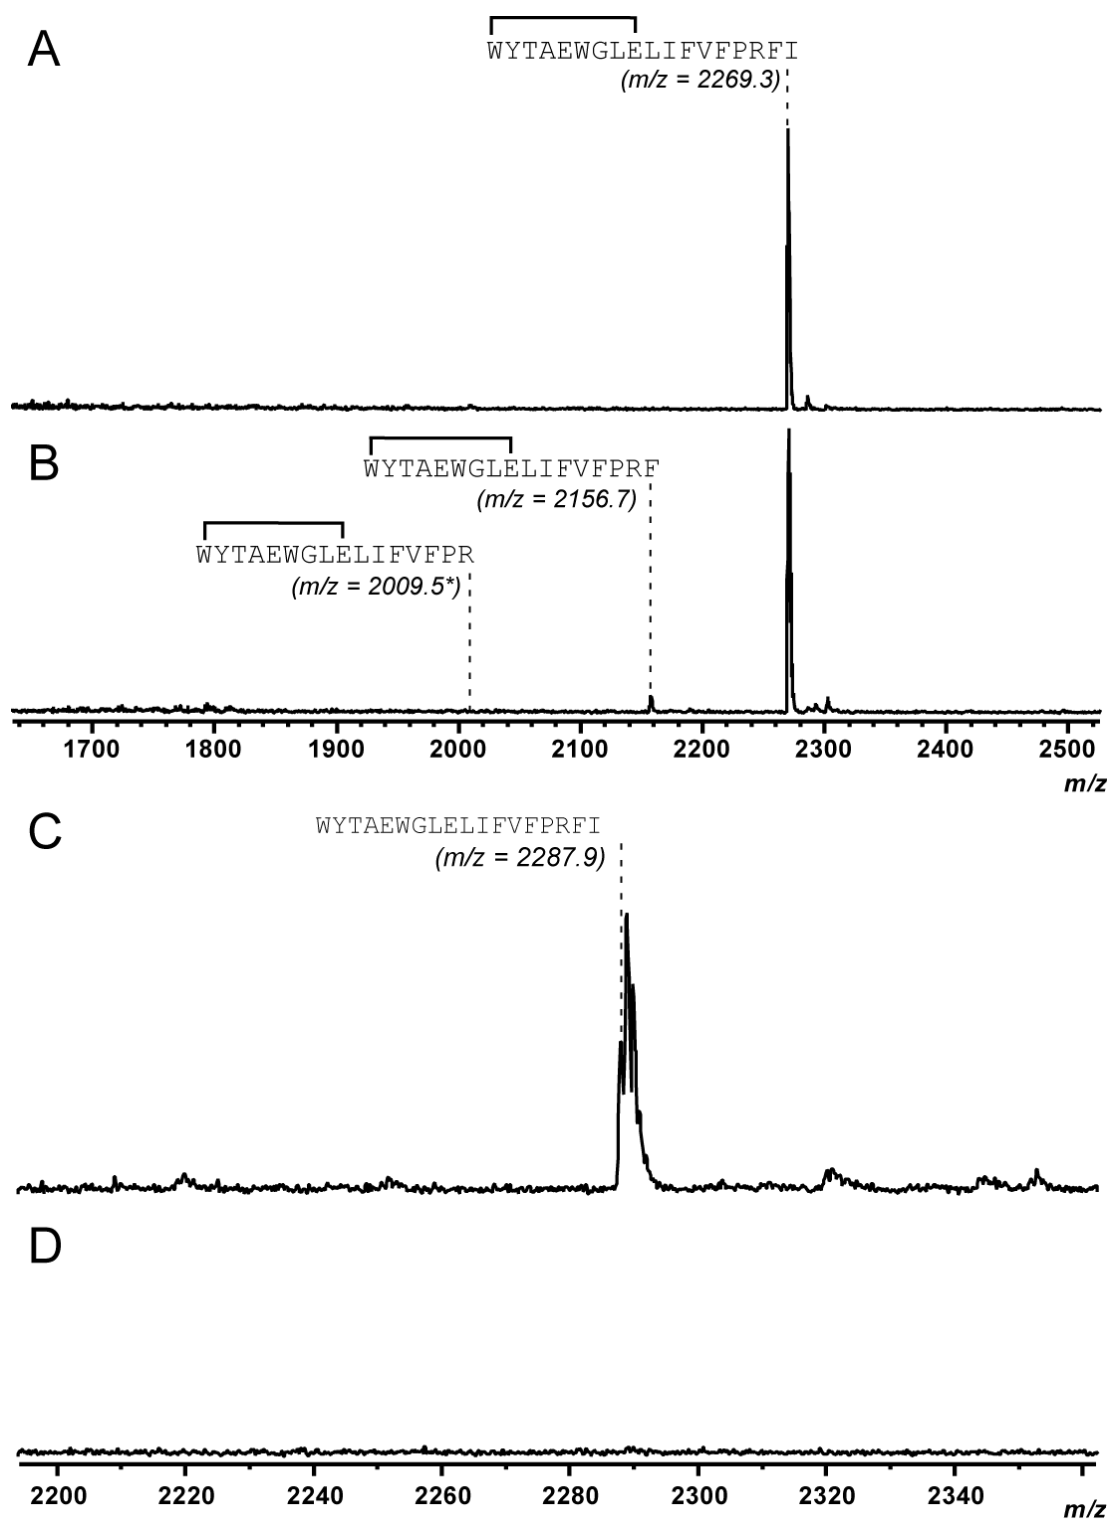

**Figure S11. Proteolytic resistance of biosynthetically reconstituted fusilassin.** Reconstituted fusilassin (A) was treated with carboxypeptidase Y for 18 h, yielding one additional mass corresponding to removal of the C-terminal residue Ile ( $m/z$  2156.7 Da) while removal of both Ile<sub>18</sub>Phe<sub>17</sub> ( $m/z$  2009.5 Da, indicated by asterisk) was not observed (B). Identical treatment of linear core (C) led to complete proteolytic degradation, with no intermediate masses observed (D).

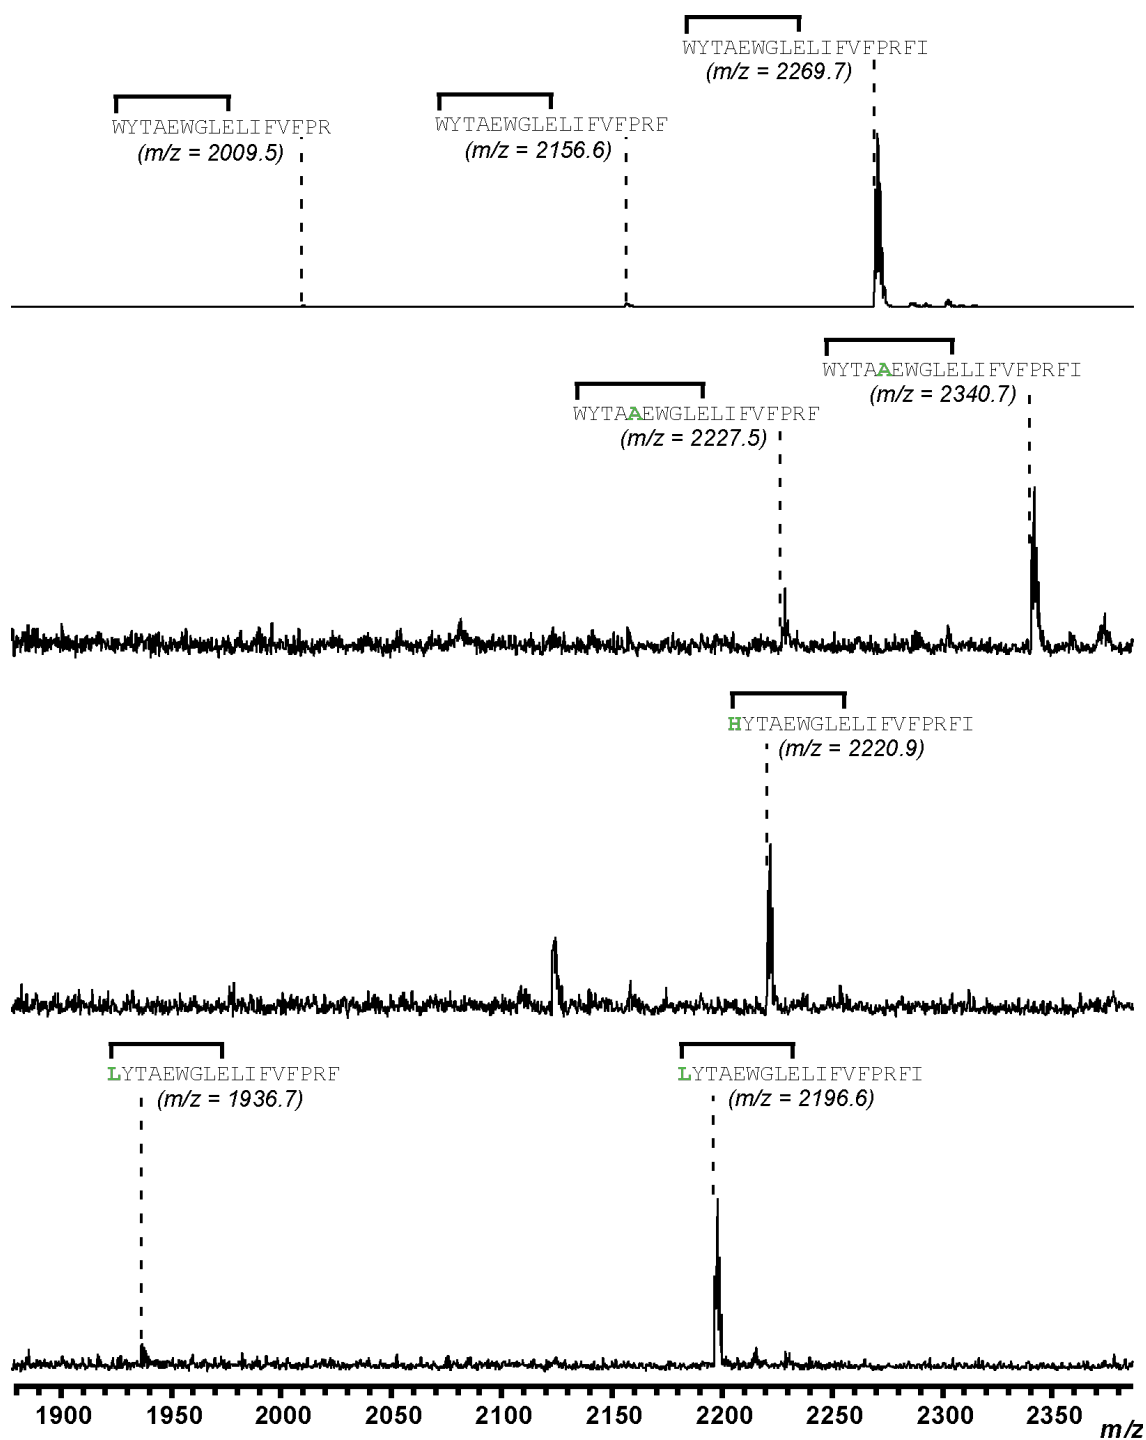

**Figure S12. MALDI-TOF MS analysis of carboxypeptidase Y-treated biosynthetically reconstituted fusilassin variants.** After heating at 95 °C for 2 h and a subsequent 18 h digestion with carboxypeptidase Y, all lasso peptides exhibited complete digestion of residual linear precursors (where appropriate) and incomplete proteolysis of dehydrated products, supporting the presence of a threaded conformation in all cases. No additional C-terminal proteolytic products were observed for any variant (non-wild-type residues are indicated in green).

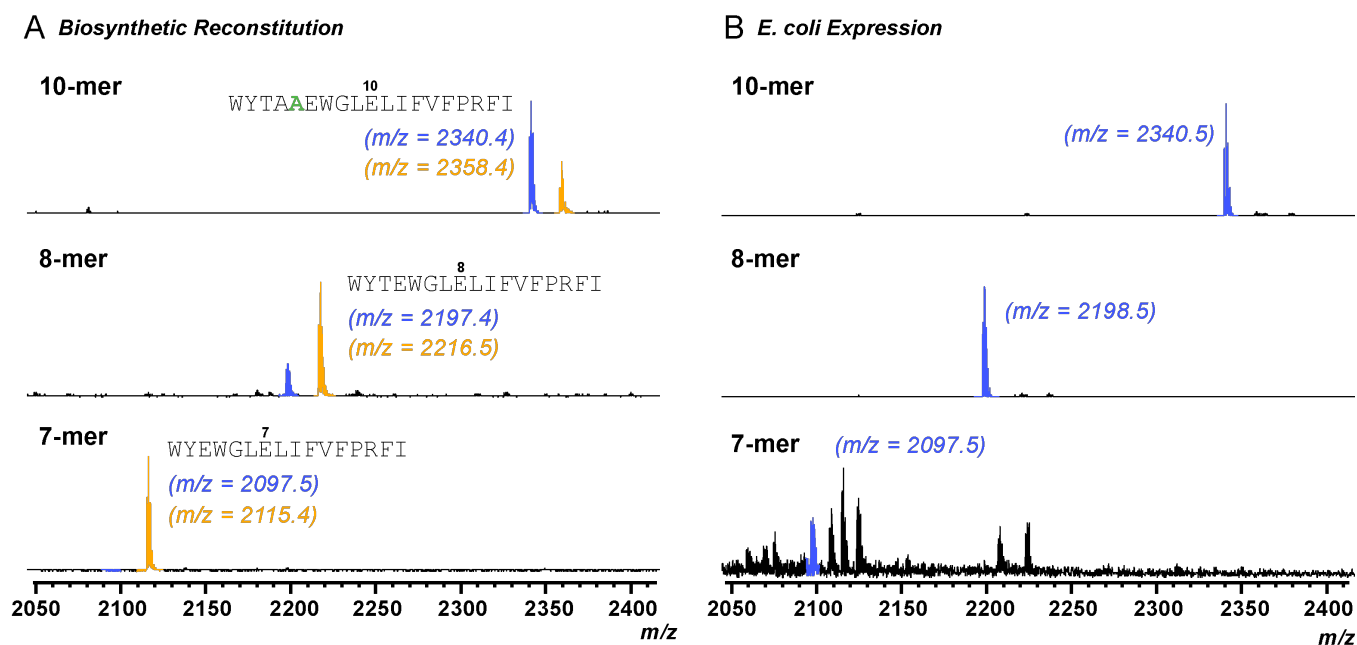

**Figure S13. Enzymatic processing of FusA ring distortions.** The fusilassin biosynthetic proteins (FusB, C, and E) were able to generate 10- and 8-mer macrolactam rings both by biosynthetic reconstitution (A) and *E. coli* expression (B). Contraction of the ring size to seven residues largely abrogated processing by the enzymatic machinery. Mature lasso peptides are indicated in blue while linear core peptide is indicated in orange.

**A**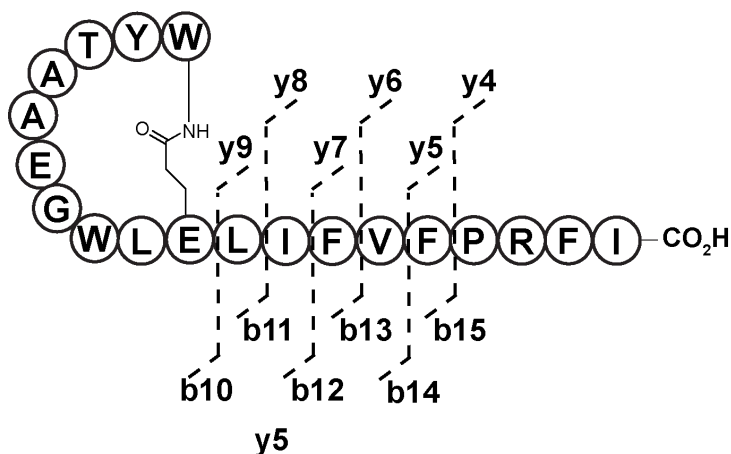

| Species       | Predicted mass | Observed mass | Error (ppm) |
|---------------|----------------|---------------|-------------|
| $[M+2H]^{2+}$ | 1170.6144      | 1170.6115     | 2.5         |
| b10           | 1189.5313      | 1189.5287     | 2.2         |
| b11           | 1302.6154      | 1302.6123     | 2.3         |
| b12           | 1415.6994      | 1415.6974     | 1.4         |
| b13           | 1562.7678      | 1562.7649     | 1.9         |
| b14           | 1661.8362      | 1661.8328     | 2.1         |
| b15           | 1808.9047      | 1808.9004     | 2.4         |
| y4            | 532.3242       | 532.3233      | 1.7         |
| y5            | 679.3926       | 679.3914      | 1.8         |
| y6            | 778.4610       | 778.4595      | 1.9         |
| y7            | 925.5294       | 925.5276      | 2.0         |
| y8            | 1038.6135      | 1038.6104     | 3.0         |
| y9            | 1151.6976      | 1151.6967     | 0.8         |

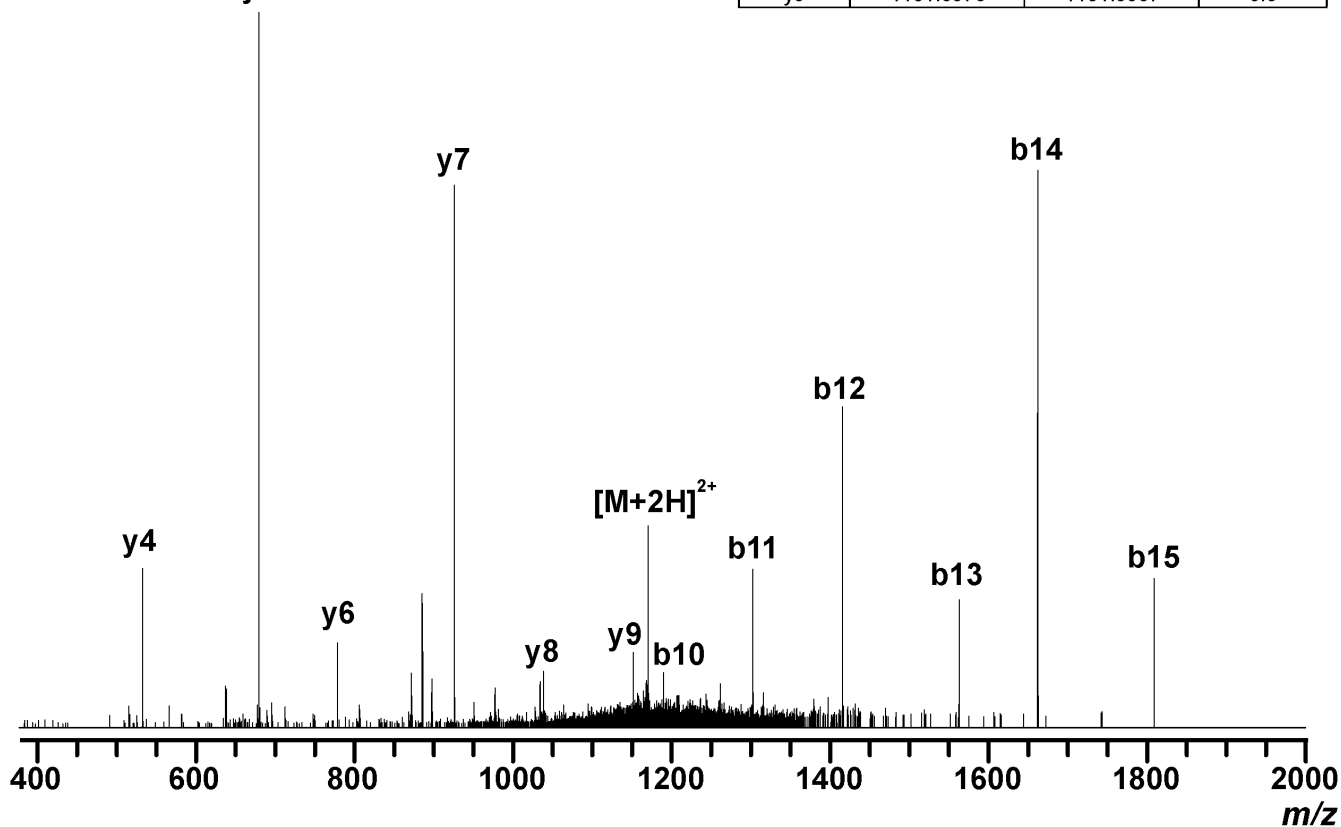

**Figure S14: HR-ESI-MS/MS of biosynthetically reconstituted lasso peptide variants.** Lasso peptides were subjected to collision-induced dissociation, resulting in a series of  $b^+$  and  $y^+$  ions consistent with the predicted site of macrolactam formation for each tested peptide. The ring expansion of fusilassin demonstrated a macrolactam formed between Trp1 and Glu10 (A). Substitution of the citrulassin A acceptor residue to Glu yielded a product with an 8-mer macrolactam between Leu1 and Gly8 (B, next page). Removal of Ala5 from CitA generated a product with the predicted 7-mer macrolactam (C, page after next).



**B**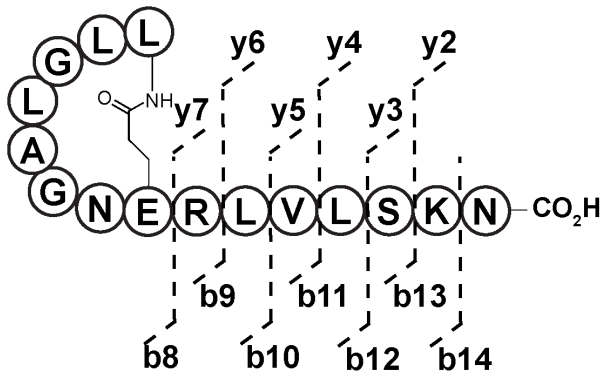

| Species              | Predicted mass | Observed mass | Error (ppm) |
|----------------------|----------------|---------------|-------------|
| [M+2H] <sup>2+</sup> | 789.9699       | 789.9692      | 0.9         |
| b8                   | 750.4145       | 750.4140      | 0.6         |
| b9                   | 906.5156       | 906.5149      | 0.7         |
| b10                  | 1019.5996      | 1019.5987     | 0.9         |
| b11                  | 1118.6681      | 1118.6675     | 0.5         |
| b12                  | 1231.7521      | 1231.7514     | 0.6         |
| b13                  | 1318.7842      | 1318.7830     | 0.9         |
| b14                  | 1446.8791      | 1446.8780     | 0.7         |
| y2                   | 261.1557       | 261.1556      | 0.4         |
| y3                   | 348.1878       | 348.1875      | 0.7         |
| y4                   | 461.2718       | 461.2715      | 0.8         |
| y5                   | 560.3402       | 560.3398      | 0.9         |
| y6                   | 673.4243       | 673.4235      | 1.1         |
| y7                   | 829.5254       | 829.5248      | 0.7         |

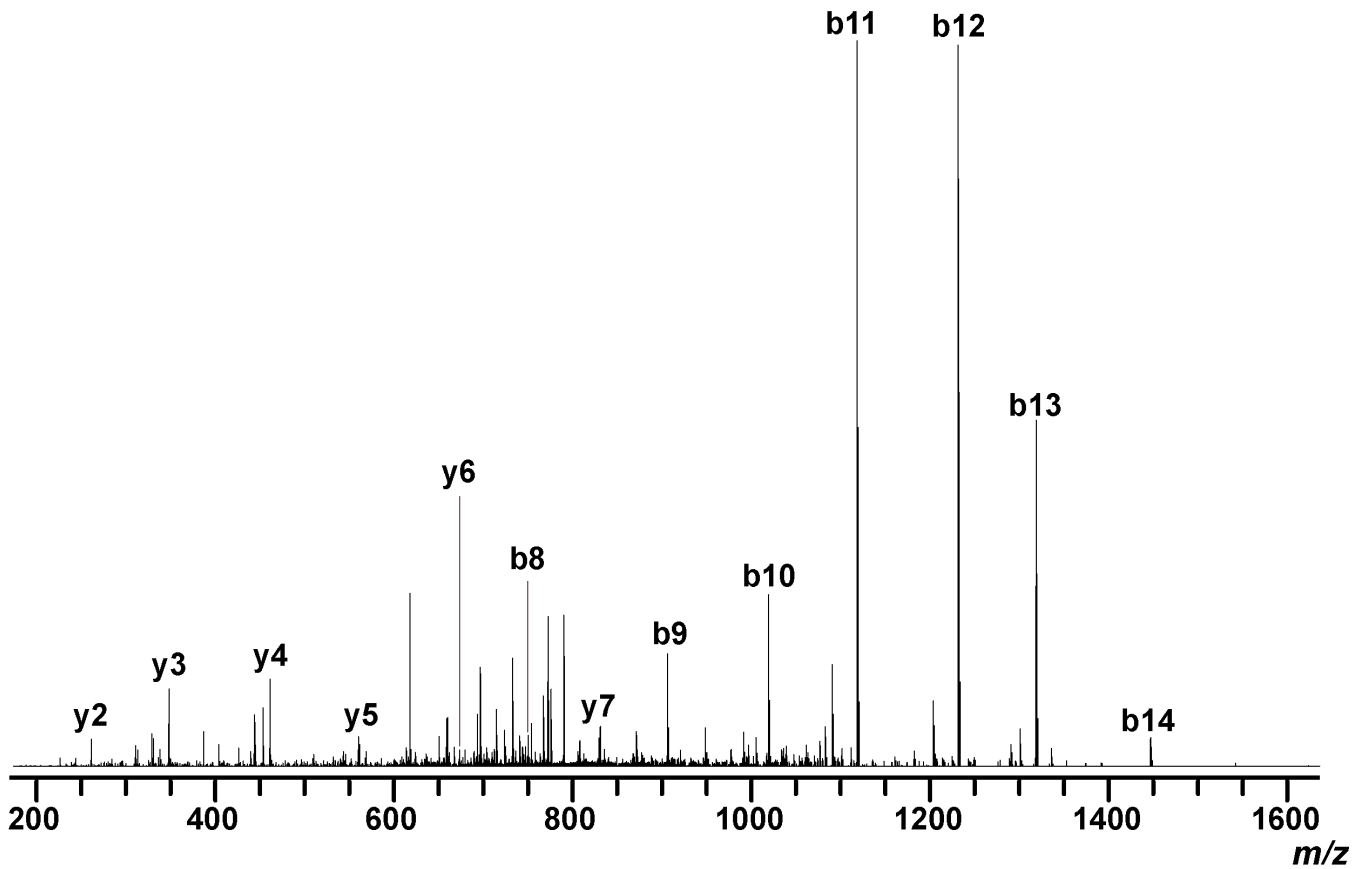

**C**

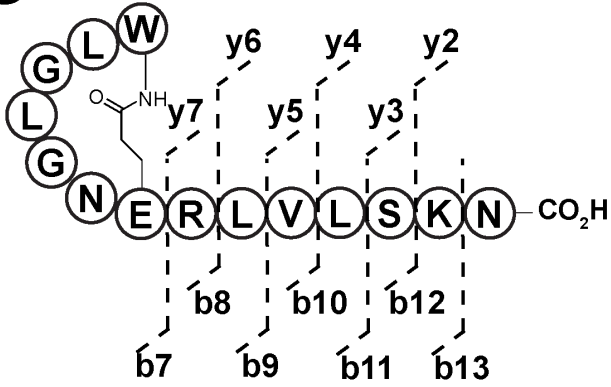

| Species       | Predicted mass | Observed mass | Error (ppm) |
|---------------|----------------|---------------|-------------|
| $[M+2H]^{2+}$ | 790.9490       | 790.9479      | 1.4         |
| b7            | 752.3726       | 752.3728      | 0.3         |
| b8            | 908.4737       | 908.4730      | 0.8         |
| b9            | 1021.5578      | 1021.5571     | 0.7         |
| b10           | 1120.6262      | 1120.6254     | 0.7         |
| b11           | 1233.7103      | 1233.7092     | 0.8         |
| b12           | 1320.7423      | 1320.7407     | 1.2         |
| b13           | 1448.8373      | 1448.8363     | 0.6         |
| y2            | 261.1557       | 261.1556      | 0.5         |
| y3            | 348.1878       | 348.1875      | 0.9         |
| y4            | 461.2718       | 461.2714      | 1.0         |
| y5            | 560.3402       | 560.3397      | 1.0         |
| y6            | 673.4243       | 673.4238      | 0.8         |
| y7            | 829.5254       | 829.5249      | 0.6         |

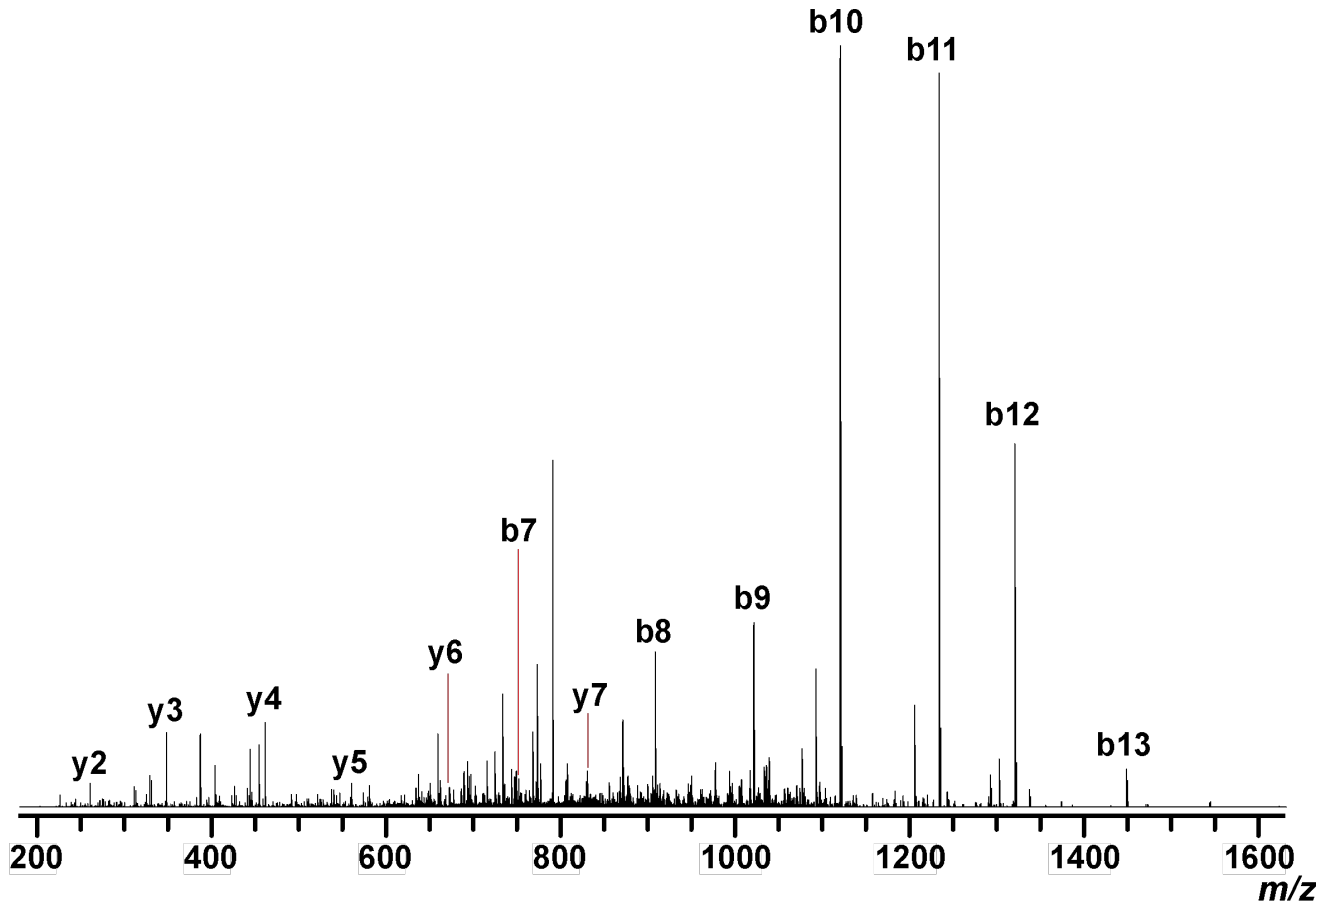

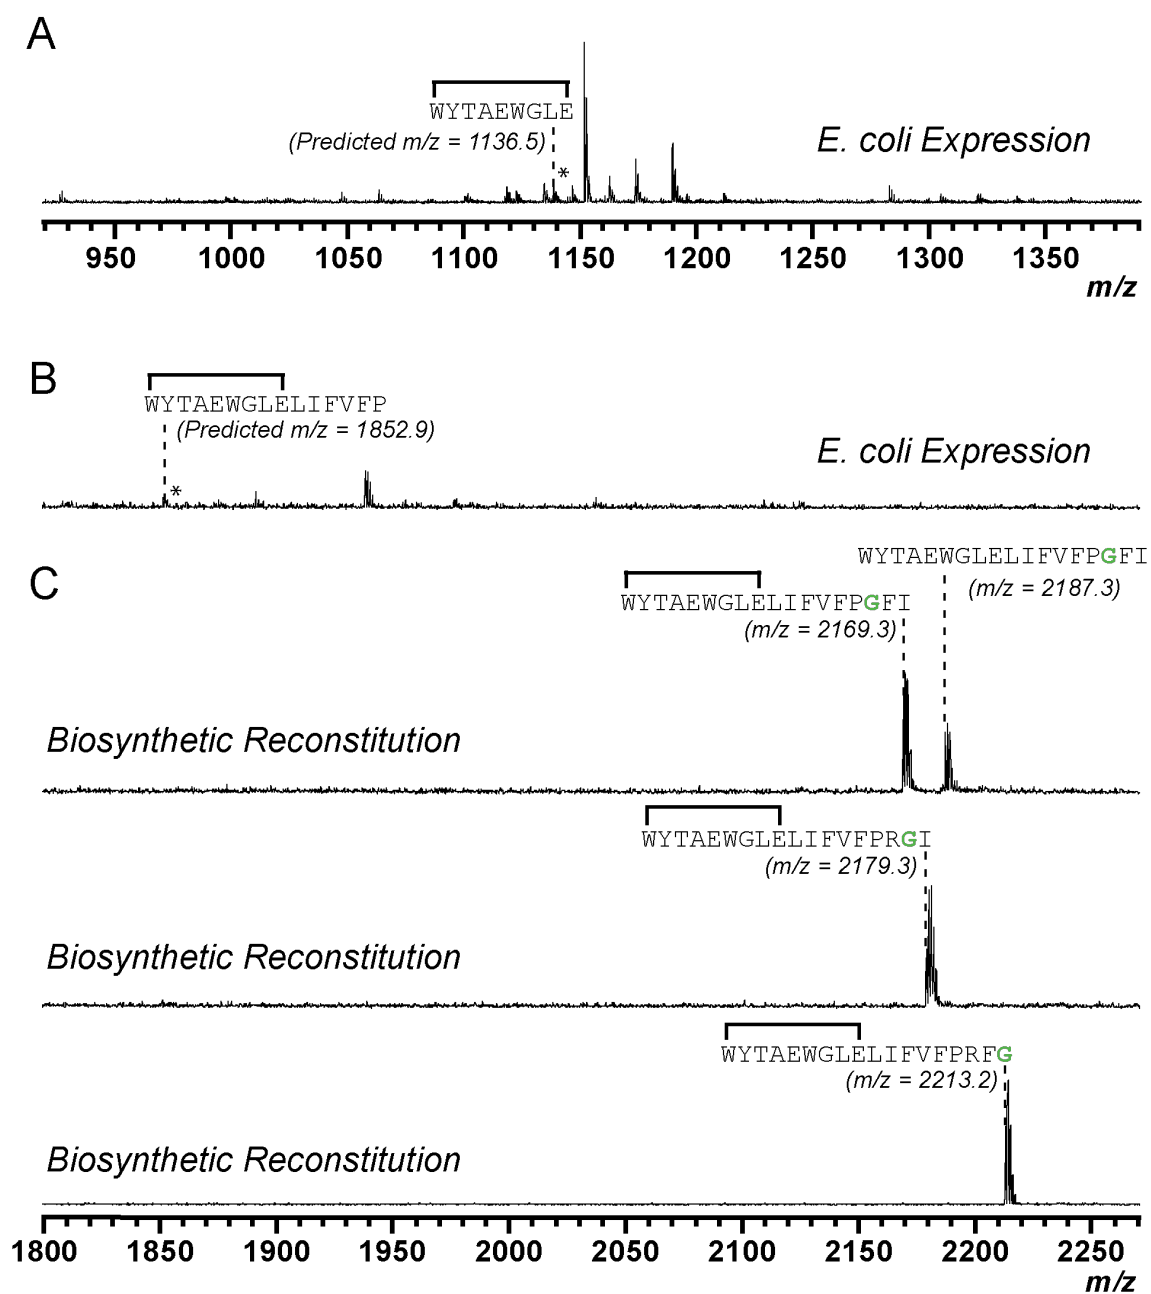

**Figure S15. MALDI-TOF-MS analysis of fusilassin C-terminal truncations.** Truncation of the C-terminal tail region of FusA abolished processing during *E. coli* expression (A). Removal of as few as 3 residues from the C-terminus (<sub>16</sub>Arg-Phe-Ile<sub>18</sub>) also abolished processing in *E. coli* (B). In panels A/B, the asterisks indicate unrelated contaminant ions of  $m/z = 1138.8$  Da and  $1851.3$  Da, respectively. The importance of the three most C-terminal residues of FusA was probed by biosynthetic reconstitution after replacement with Gly. Substitution of Phe17 and Ile18 with Gly had no observed effect while Gly-substitution of Arg16 displayed impaired processing (C).

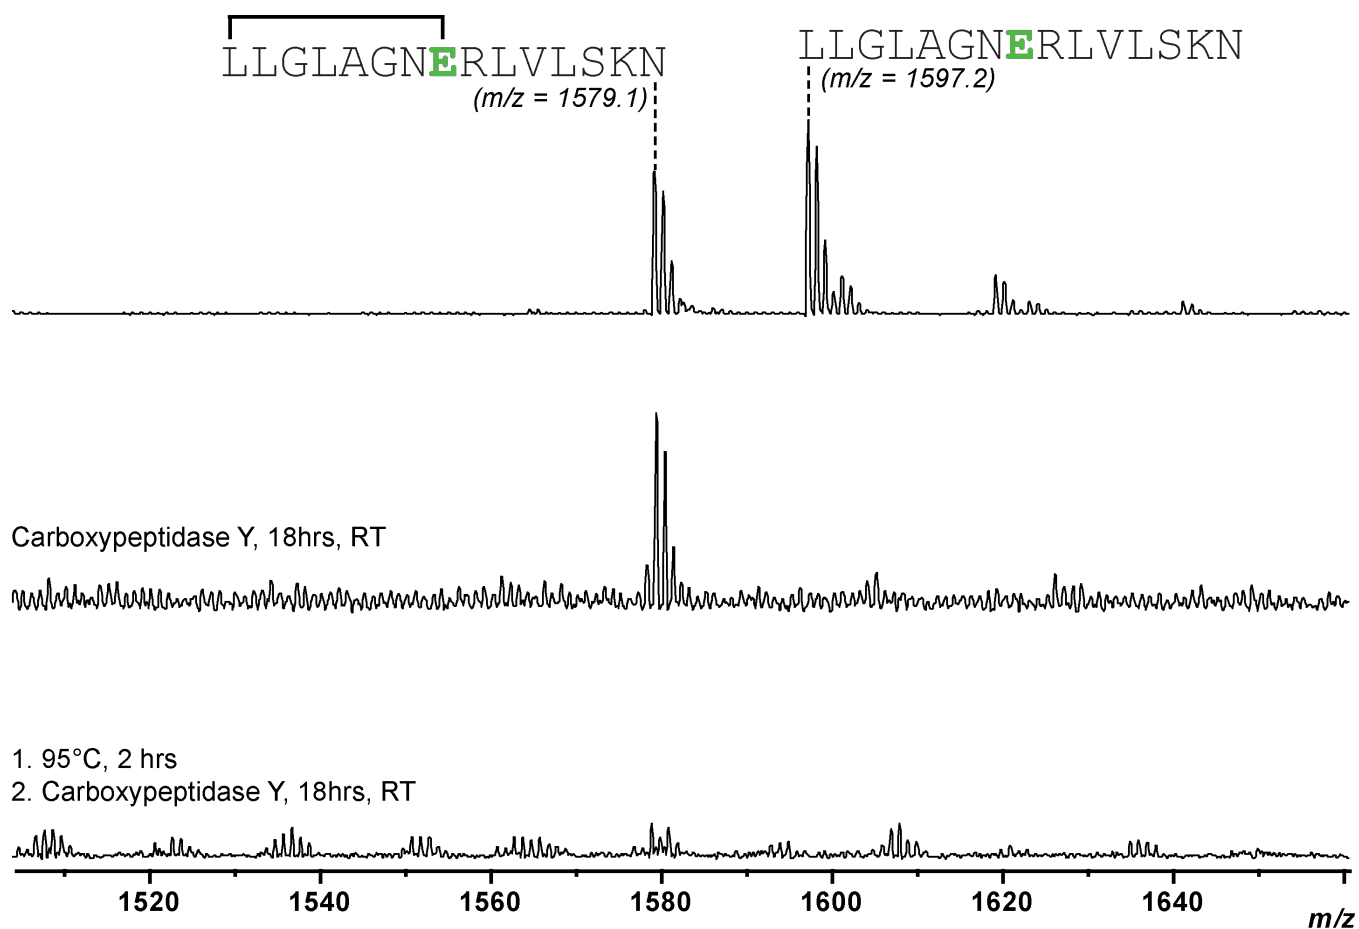

**Figure S16. MALDI-TOF-MS of carboxypeptidase Y-treated CitA-D8E variant.** Biosynthetically reconstituted lasso peptide (top) was incompletely digested after proteolysis (middle). Thermal unthreading of the lasso peptide and proteolysis completely degraded the mature product (bottom). Intermediate proteolysis products were not observed. The position of non-native residues (relative to citrulassin) are indicated in green. RT, room temperature.

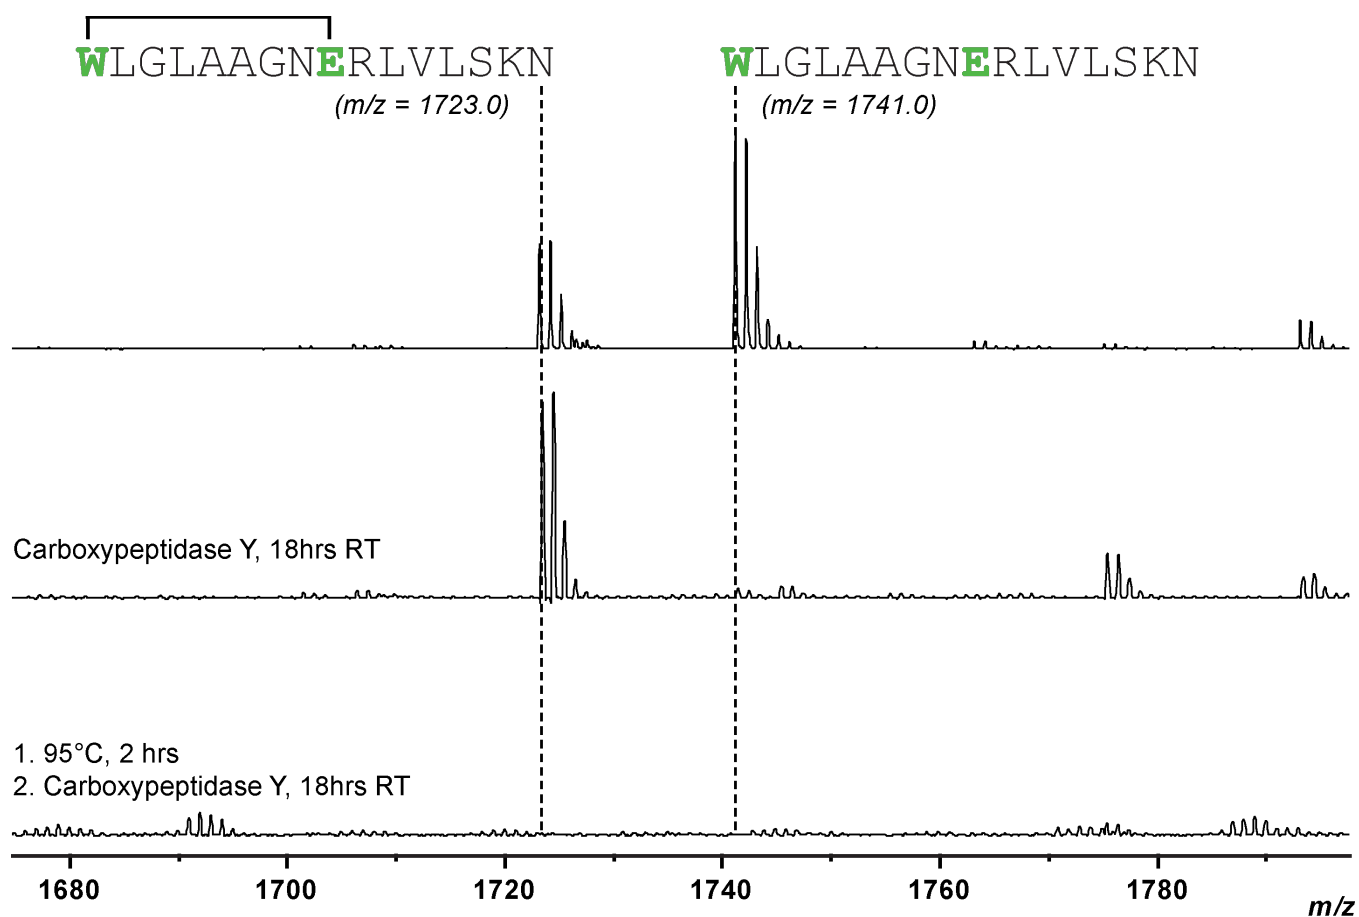

**Figure S17. MALDI-TOF-MS of carboxypeptidase Y-treated CitA variant (L1W, D8E, A5ins).** Proteolysis completely degraded the linear core peptide, though not the dehydrated product (middle). Thermal treatment potentiated complete proteolysis of the lasso peptide (bottom). Intermediate proteolysis products were not observed. The position of non-native residues (relative to citrulassin) are indicated in green. RT, room temperature.

**Fusilassin Core**  
WYTAEWGLELIFVFPFI

**Citrulassin A Core**  
LLGLAGNDRVLVLSKN

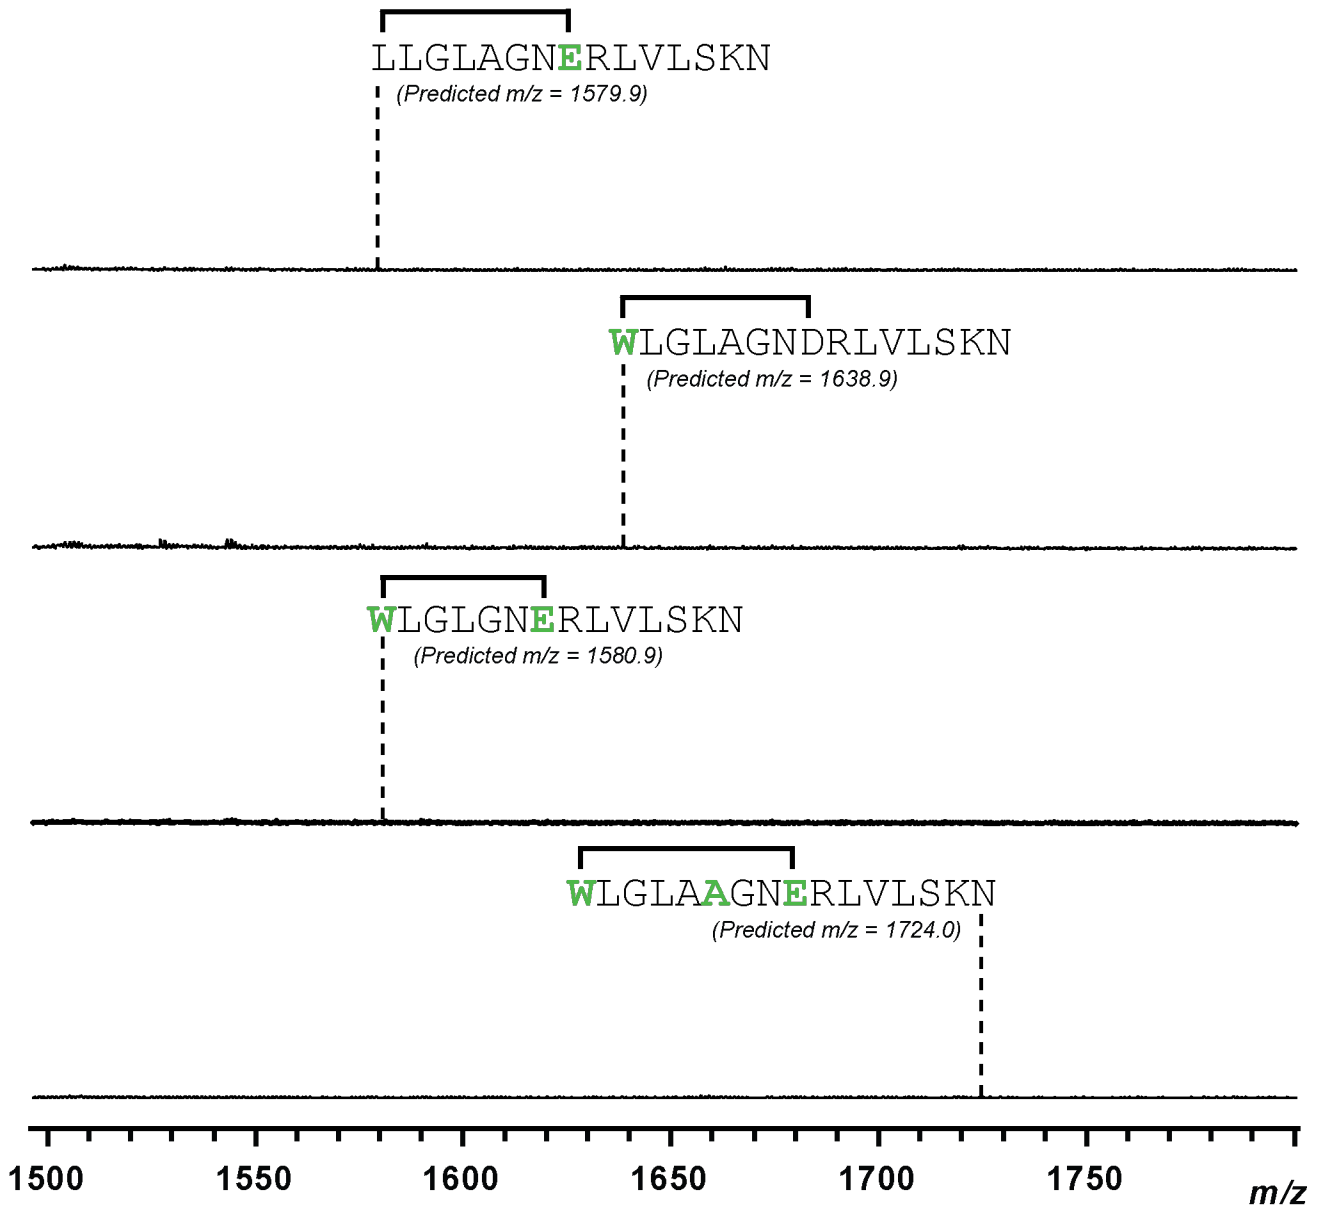

**Figure S18. MALDI-TOF-MS of heterologously expressed citrulassin A variants.** None of the tested constructs were processed by *E. coli* expression.

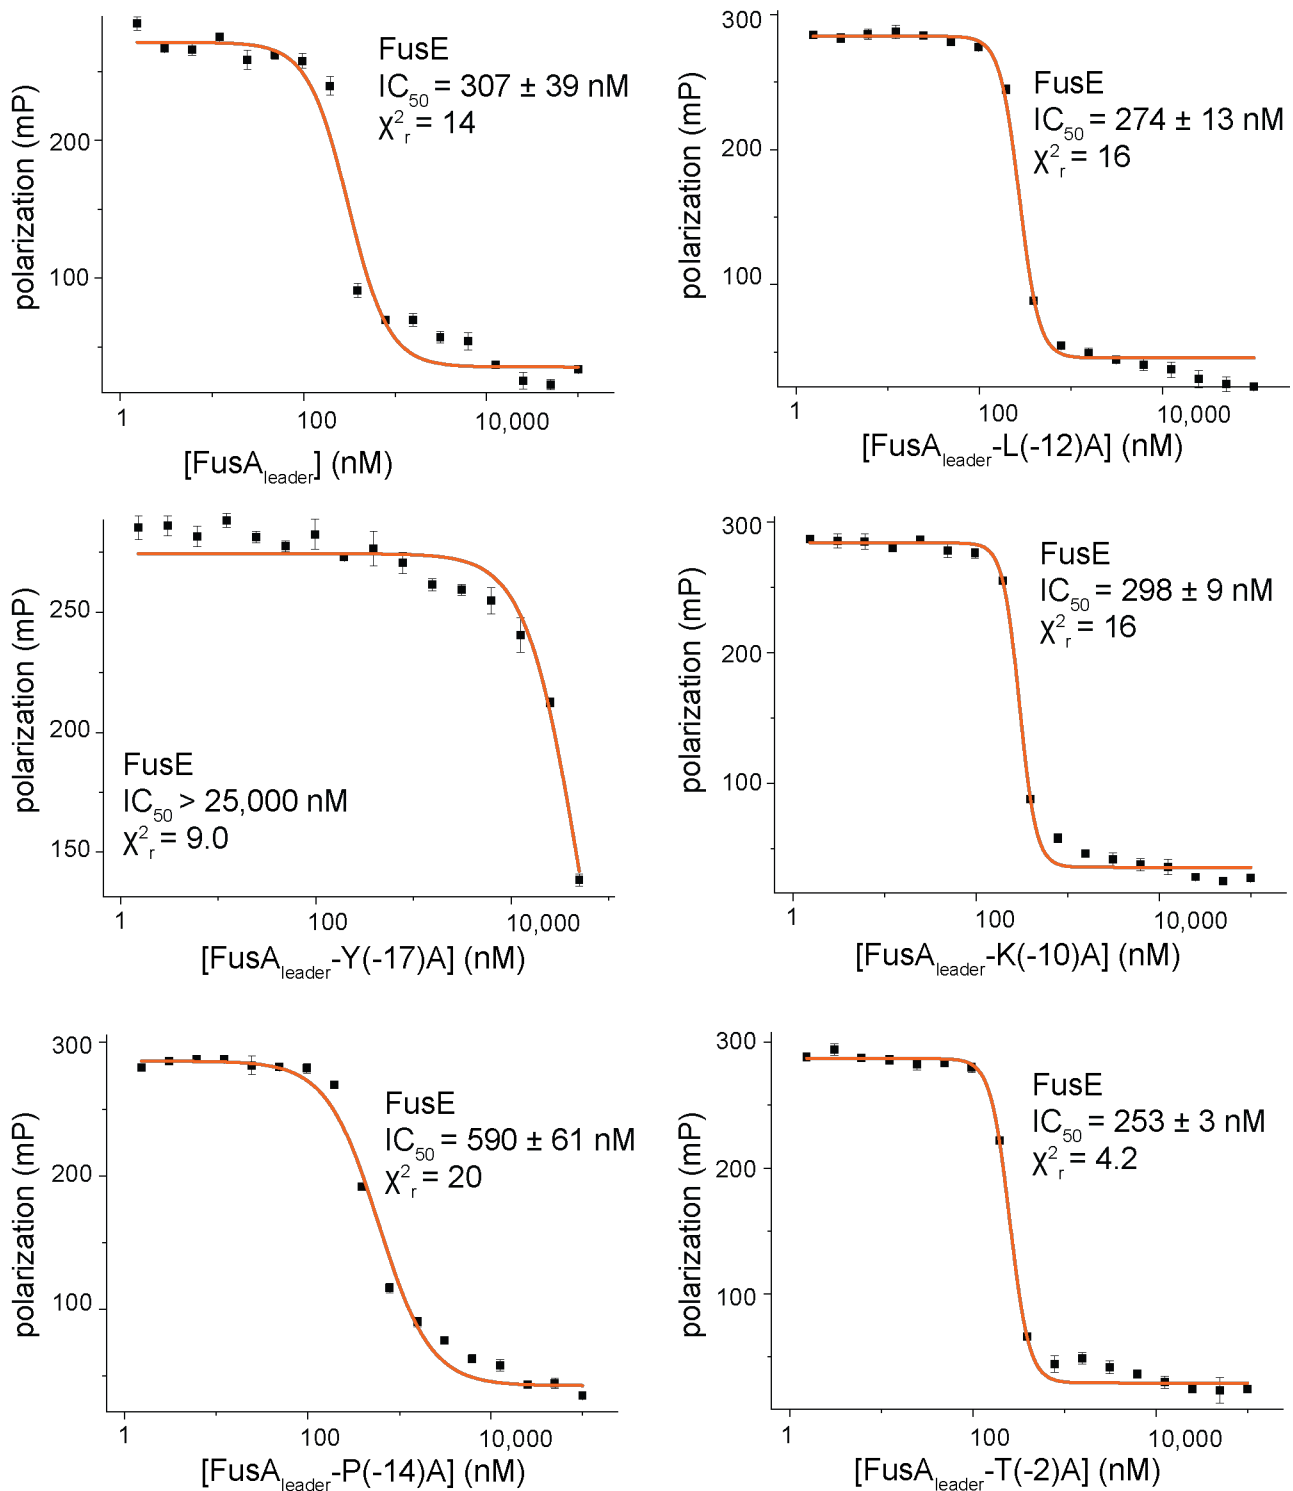

**Figure S19. Competitive fluorescence polarization of  $FusA_{\text{leader}}$  variants.** Fluorescence polarization was performed using wild-type-FusE, fluorescein-labeled  $FusA_{\text{leader}}$  and indicated  $FusA_{\text{leader}}$  variants as competitive ligands. GREMLIN predictions of sites of interaction between the YxxP leader peptide motif of FusA and FusE (RRE) were confirmed, as they demonstrated decreased binding affinities. Remaining variants did not demonstrate significant perturbations to FusA-FusE interaction.

**Table S3: Competition fluorescence polarization of FusA<sub>leader</sub> variants.** Experiments were performed as described in methods. These data summarize the findings depicted in Figure S19. WT, wild-type.

| <b>FusA<sub>leader</sub> Variant</b> | <b>FusE</b> | <b>IC<sub>50</sub> (nM)</b> |
|--------------------------------------|-------------|-----------------------------|
| WT                                   | WT          | 307 ± 39                    |
| Y(-17)A                              | WT          | >25,000                     |
| P(-14)A                              | WT          | 590 ± 61                    |
| L(-12)A                              | WT          | 247 ± 13                    |
| K(-10)A                              | WT          | 298 ± 9                     |
| T(-2)A                               | WT          | 253 ± 3                     |



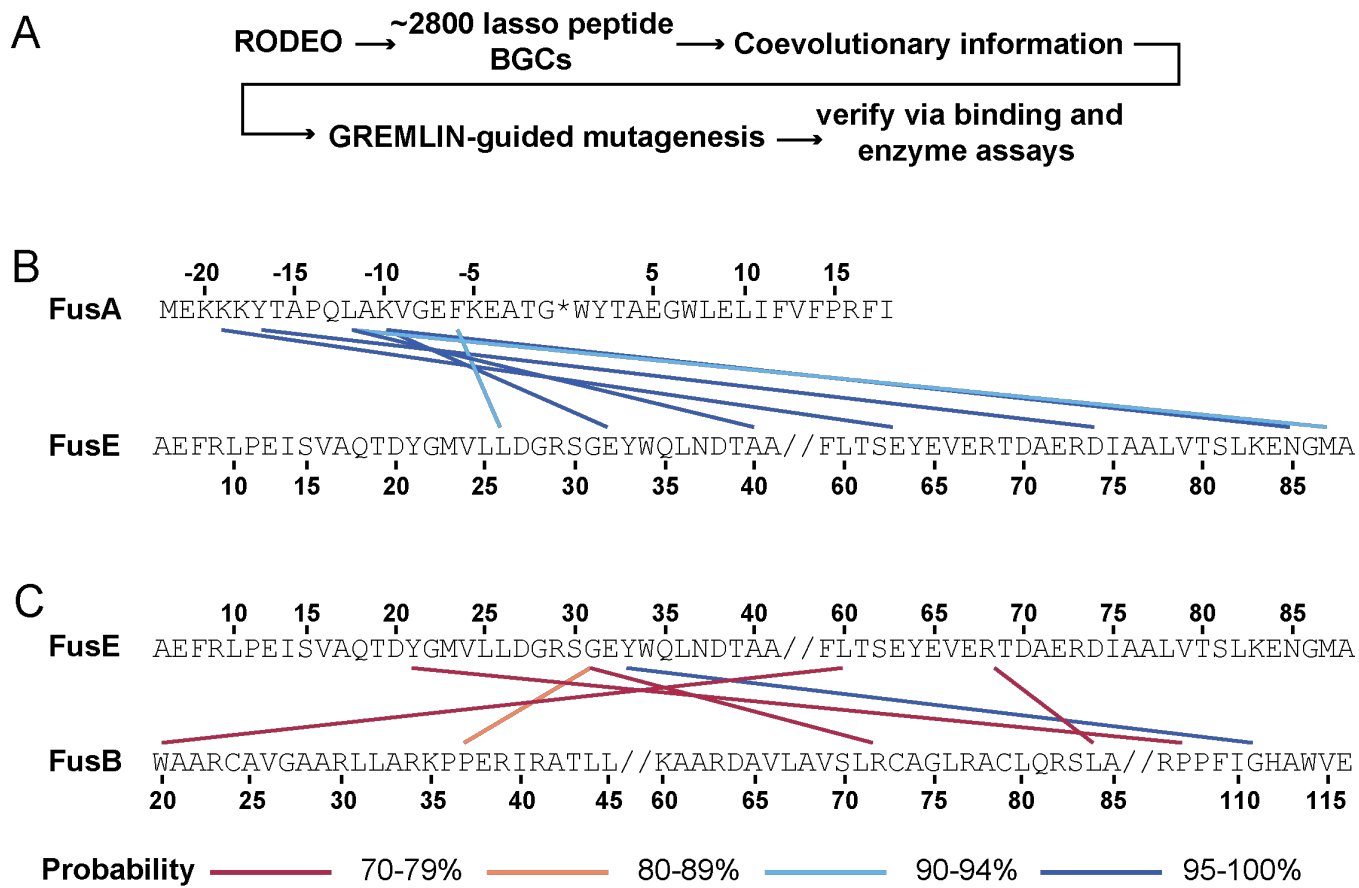

**Figure S20. Coevolutionary analysis of FusA<sub>leader</sub>:FusE and FusE:FusB.** Workflow for generation of the GREMLIN data and experimental follow-up (A). GREMLIN analysis highlighting predicted sites of interprotein contact from coevolutionary (compensatory) mutations occurring between fusilassin biosynthetic proteins. Interacting residues between FusA<sub>leader</sub> and FusE (B) and interacting residues between FusE and FusB (C) were predicted by a bioinformatic data set derived from RODEO.

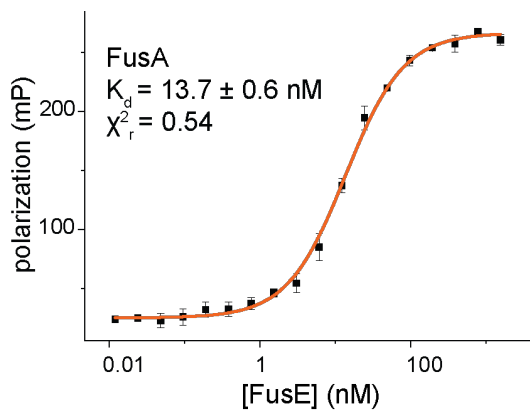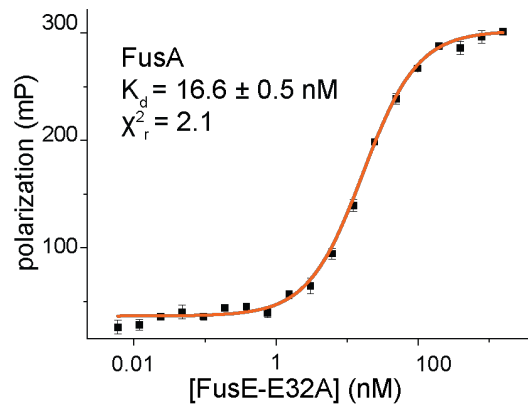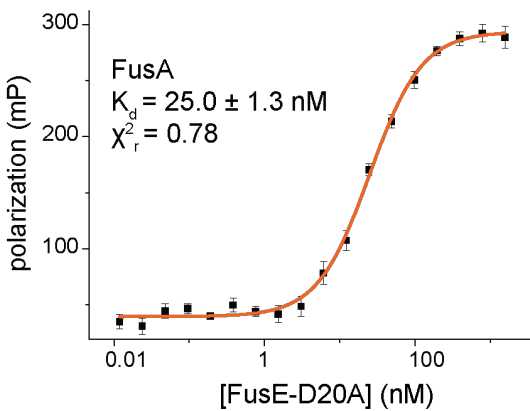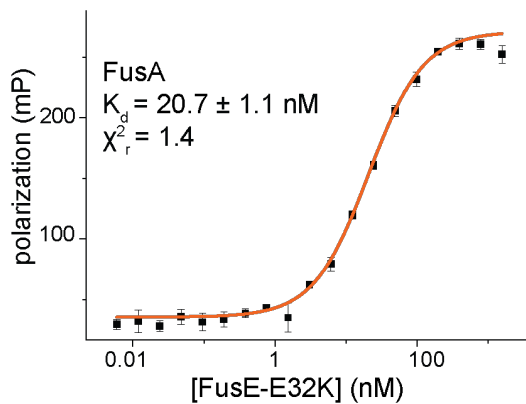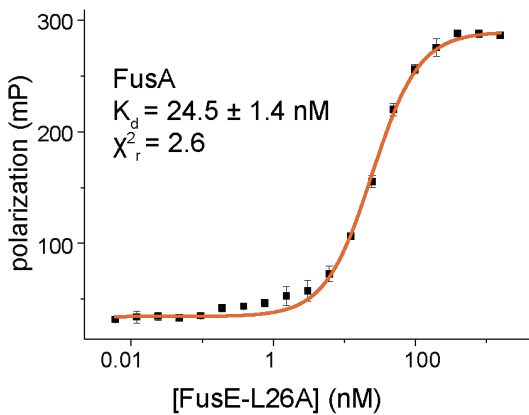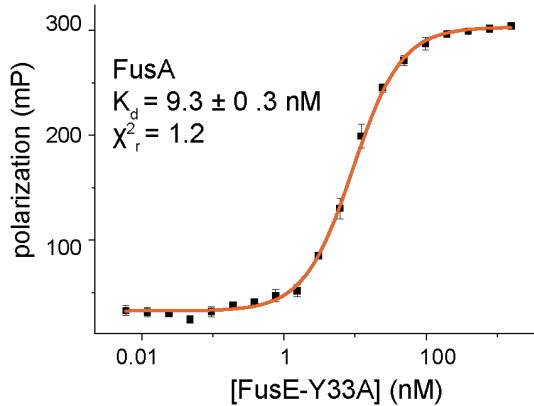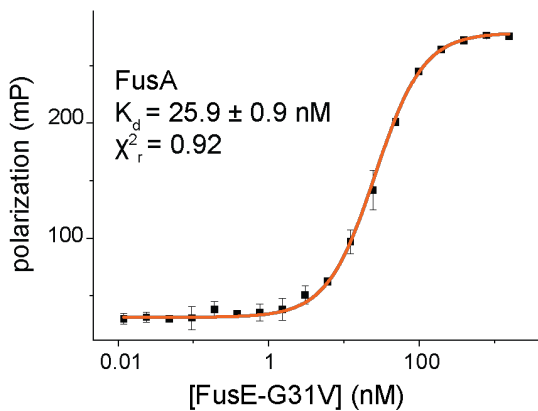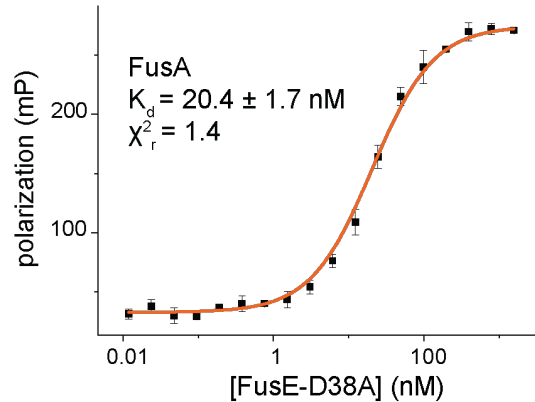

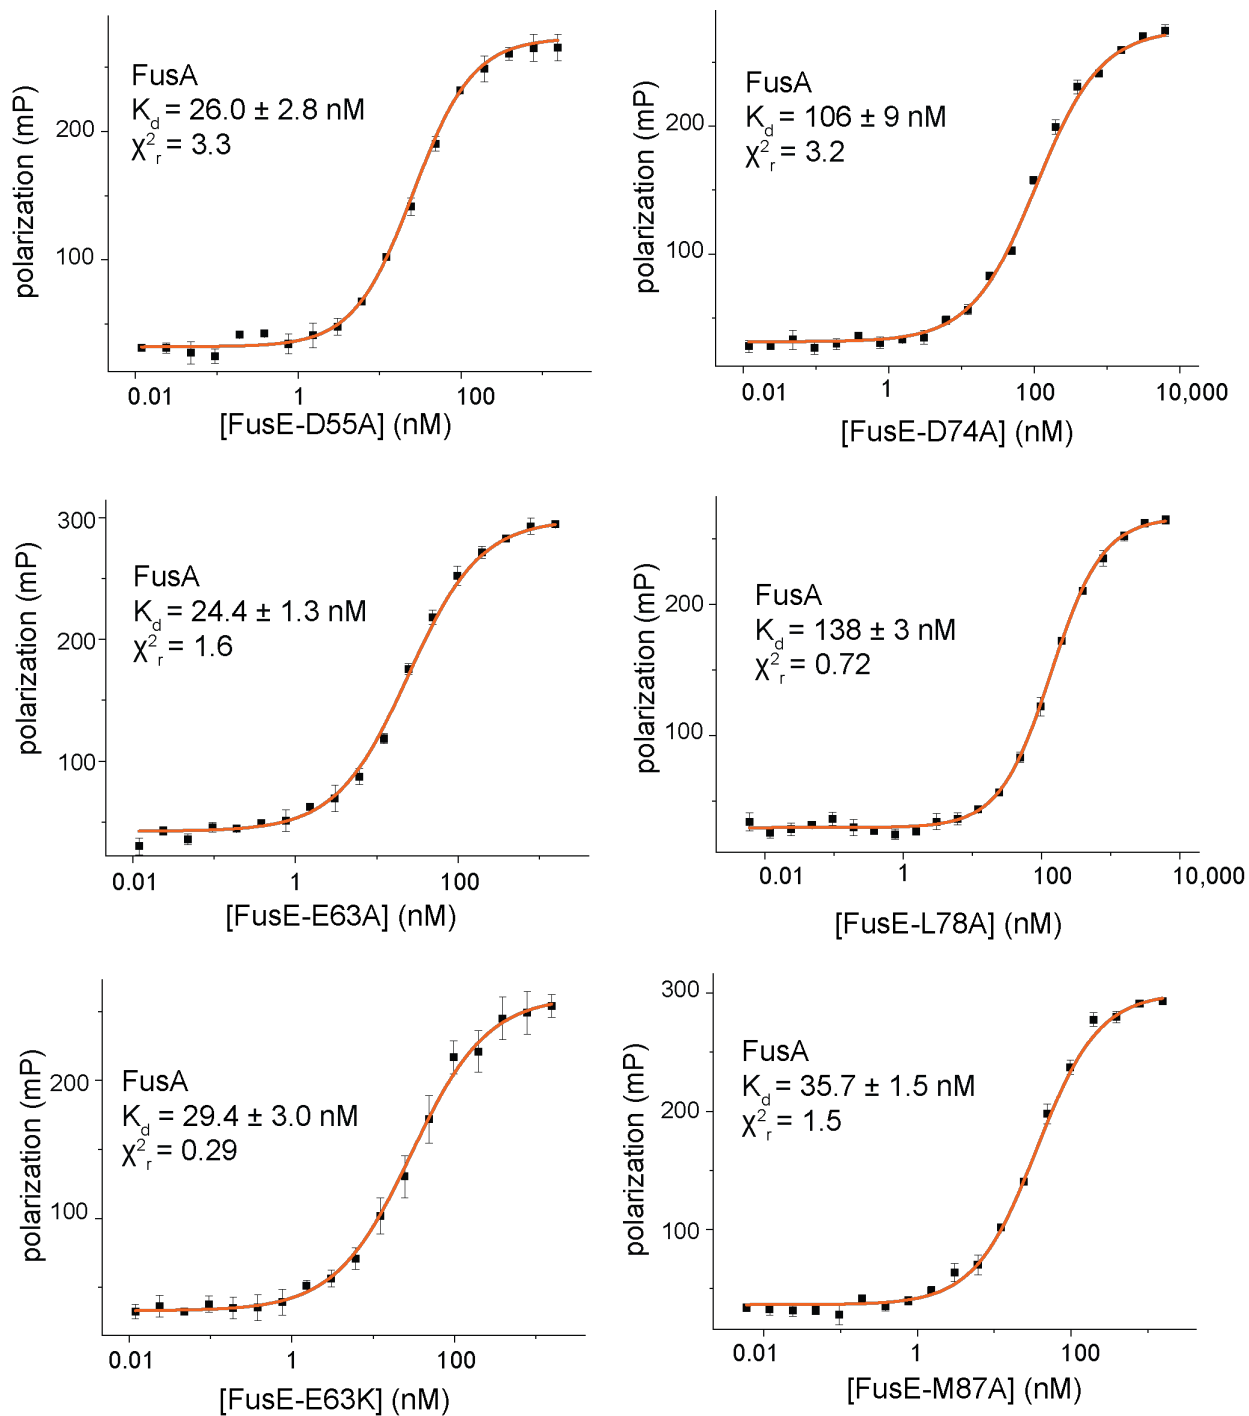

**Figure S21. Direct fluorescence polarization of *FusA*<sub>leader</sub> and RRE variants.** Fluorescence polarization was performed using fluorescein-labeled *FusA*<sub>leader</sub> and indicated *FusE* variants. Residues predicted to be sites of interaction between *FusA*<sub>leader</sub> and *FusE* (RRE) demonstrated lower binding affinities, whereas residues predicted to be sites of interaction between the *FusE* and *FusB* did not decrease binding affinity to *FusA*<sub>leader</sub>.

**Table S4: Direct fluorescence polarization of FusE variants.** Experiments were performed as described in methods. These data summarize the findings depicted in Figure S21. WT, wild-type.

| <b>FusA<sub>leader</sub></b> | <b>FusE Variant</b> | <b>K<sub>d</sub> (nM)</b> |
|------------------------------|---------------------|---------------------------|
| WT                           | WT                  | 13.7 ± 0.6                |
| WT                           | D20A                | 24.5 ± 1.3                |
| WT                           | L26A                | 24.5 ± 1.4                |
| WT                           | G31V                | 25.9 ± 0.9                |
| WT                           | E32A                | 16.6 ± 0.5                |
| WT                           | E32K                | 20.7 ± 1.1                |
| WT                           | Y33A                | 9.3 ± 0.3                 |
| WT                           | D38A                | 20.4 ± 1.7                |
| WT                           | D55A                | 20.6 ± 2.8                |
| WT                           | E63A                | 24.4 ± 1.3                |
| WT                           | E63K                | 29.4 ± 3.0                |
| WT                           | D74A                | 106 ± 9                   |
| WT                           | L78A                | 138 ± 3                   |
| WT                           | M87A                | 35.7 ± 1.5                |

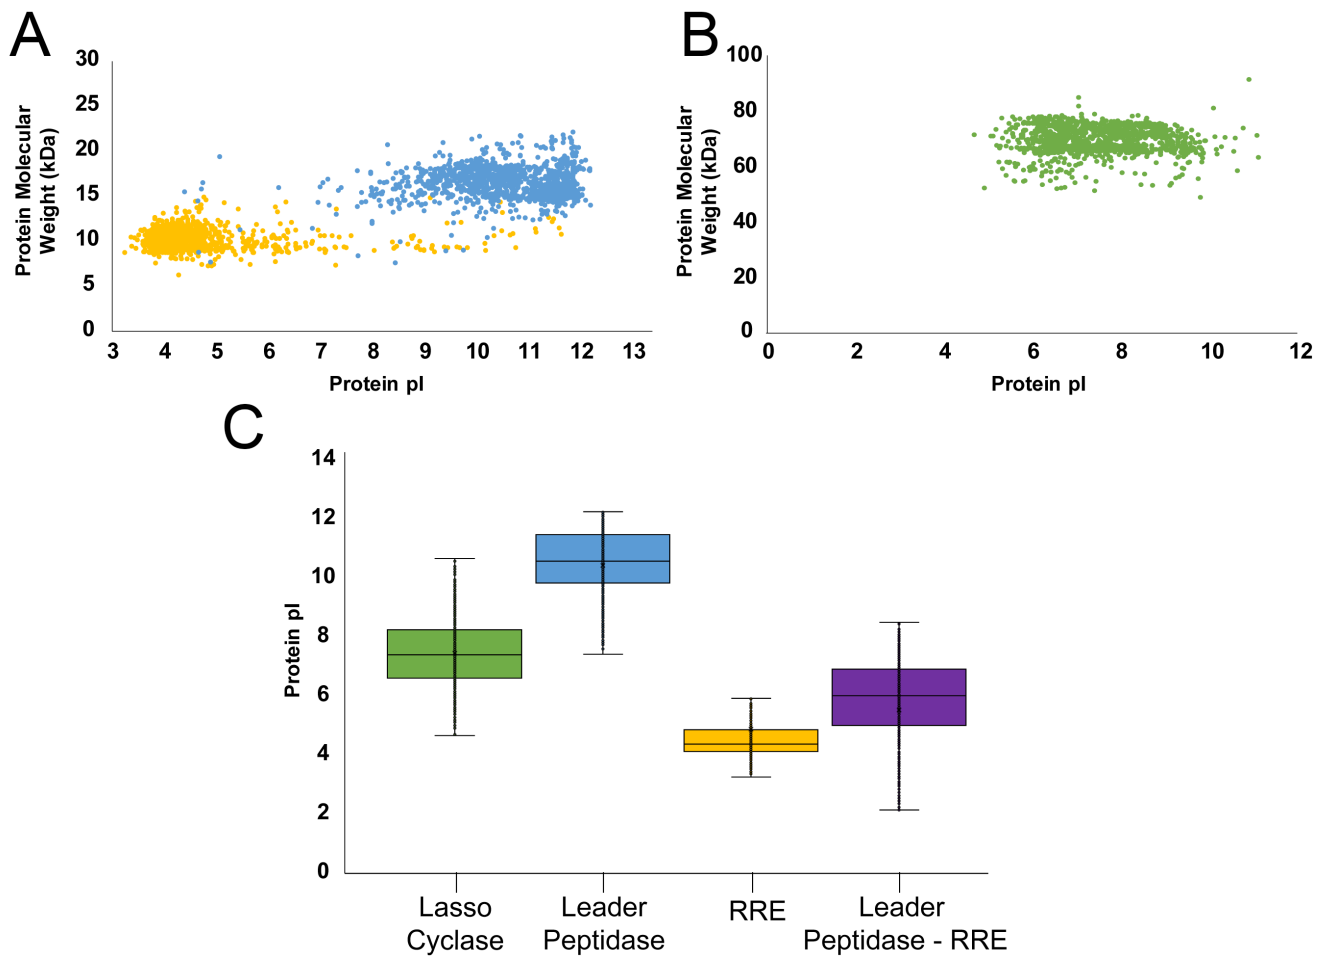

**Figure S22. Calculated isoelectric points (pIs) of bioinformatically predicted lasso peptide biosynthetic enzymes.** RRE proteins of molecular weight < 14.0 kDa exhibit acidic pIs (yellow), whereas leader peptidases of molecular weight < 22.5 kDa exhibit basic pIs (blue) (A). Lasso cyclases of molecular weight > 50 kDa exhibit neutral pIs (B). When subtracting the pI of the RRE from the leader peptidase within the same BGC ( $n > 1,000$ ) the  $\Delta$ pI's were approximately neutral (C, purple). This suggests the RRE-leader peptidase interaction is highly electrostatically driven. Statistical outliers were omitted.

A

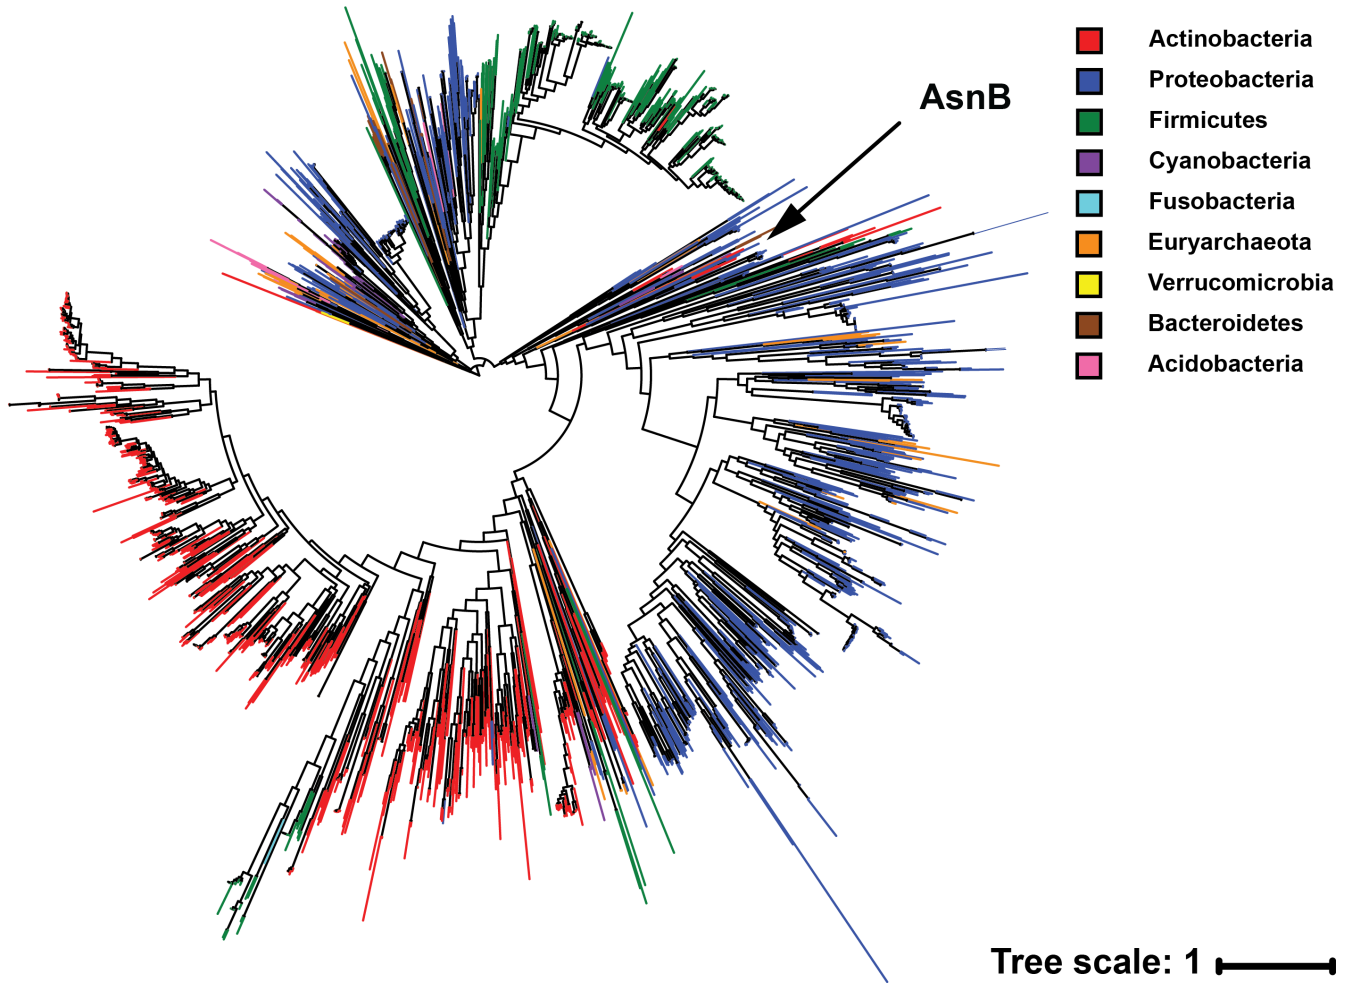

**Figure S23: Phylogenetic trees of lasso cyclases.** Shown is a maximum likelihood tree of RODEO-identified lasso cyclases colored by phylum (A). The Actinobacteria, Proteobacteria and Firmicutes are the most populated phyla. Given the monochromatic nature of the branches, these data suggest that lasso peptides have been largely transmitted vertically. The same tree has been color-coded based on the identity of the macrolactam acceptor residue (Asp vs Glu) (B). The branches are less monochromatic, suggesting that lasso cyclases that prefer Glu over Asp (or vice versa) evolved many times during evolution. For each tree, the location of *E. coli* asparagine synthetase B (AsnB) is given for reference.

B

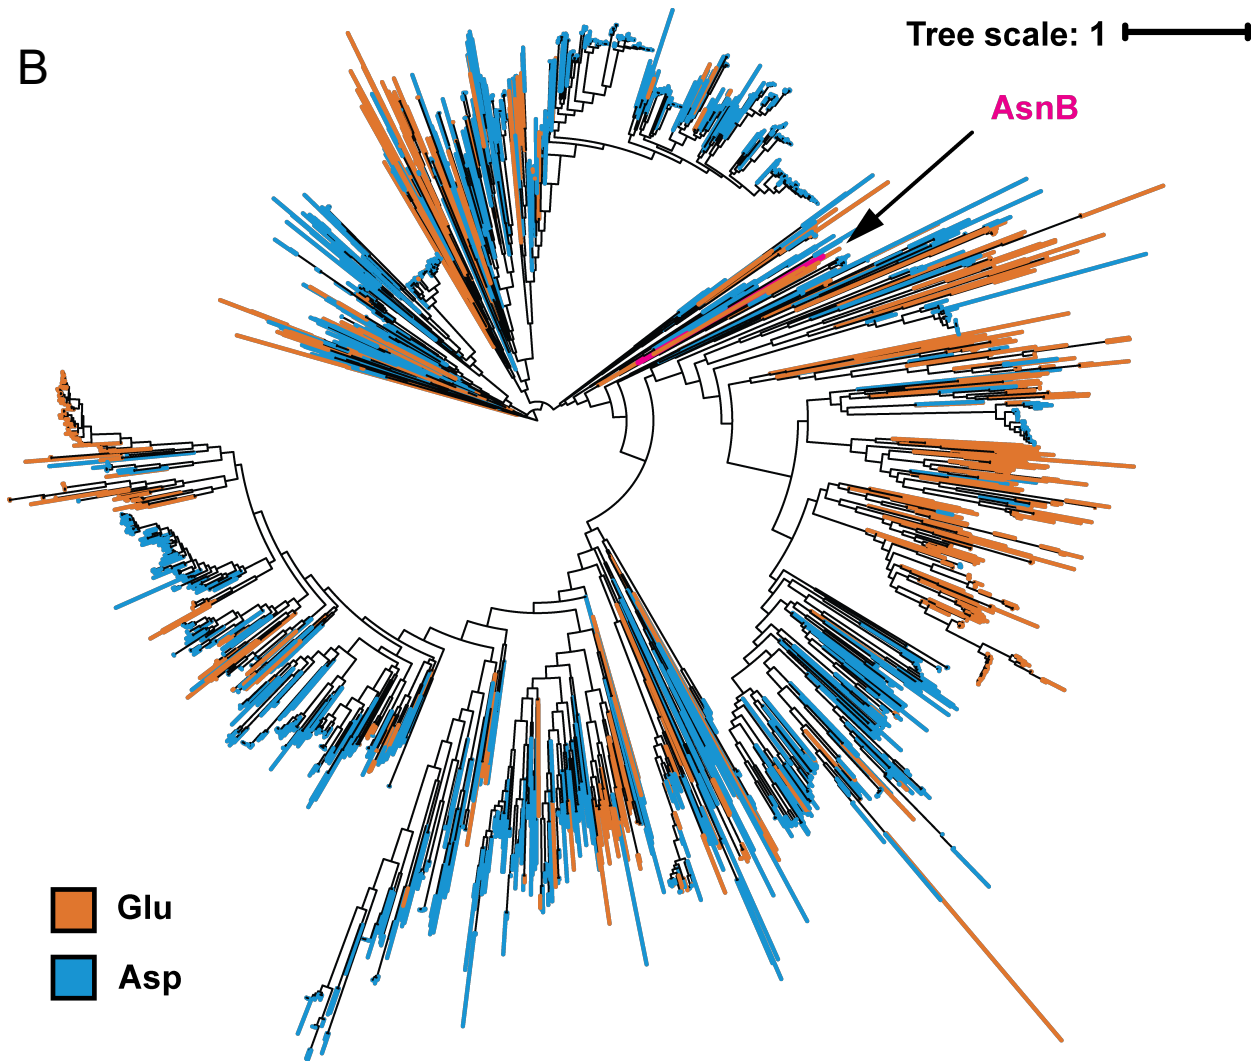

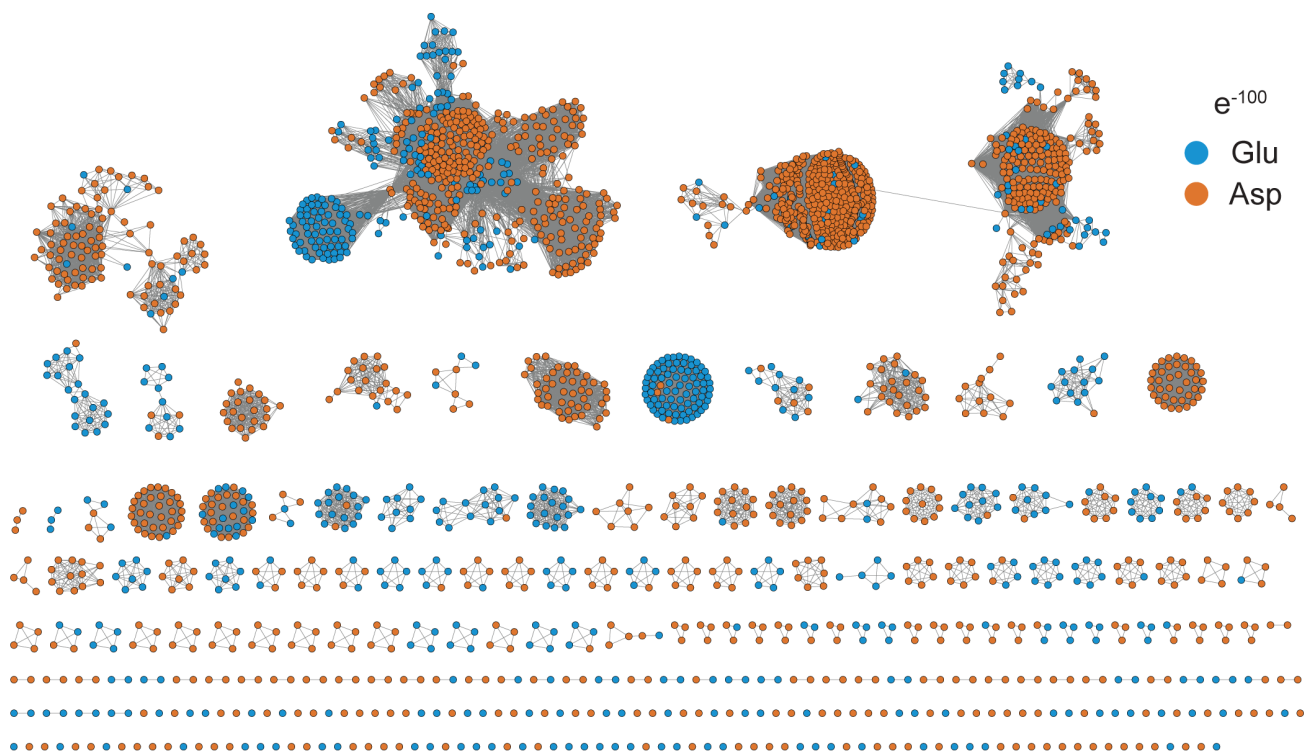

**Figure S24: Sequence similarity network of lasso cyclases.** At an alignment score of 100 (BLAST expectation value of  $e^{-100}$ ), some lasso cyclases separate into clusters that correlate well with the identity of the macrolactam acceptor residue while other clusters contain a mixture of Asp (orange) and Glu (blue) acceptor types.



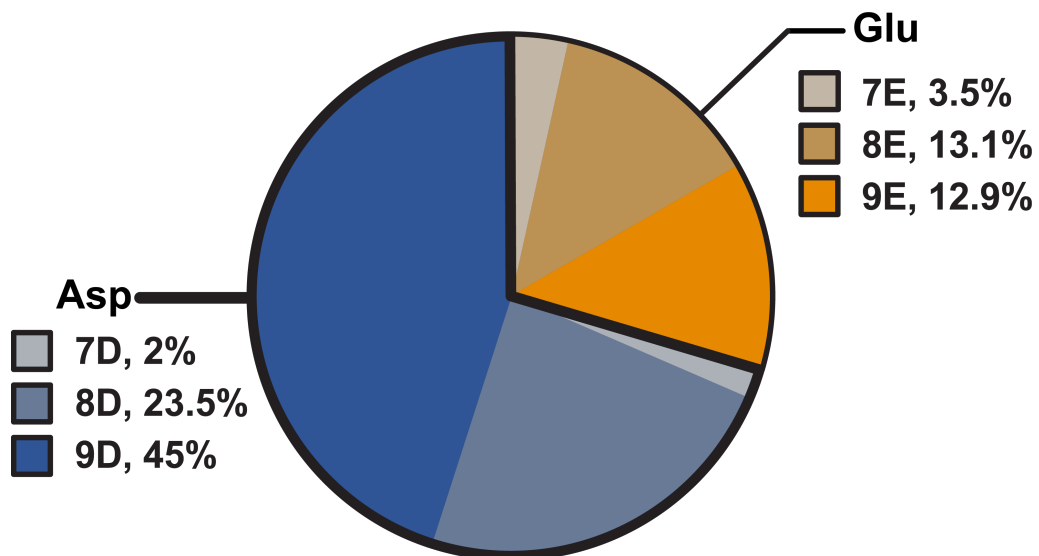

**Figure S25: Ring architecture of bioinformatically predicted lasso peptides.** The majority of lasso peptides possess an Asp acceptor residue. Among both acceptor types, the largest macrolactams (9-mers) are most frequently found while 7-mers are less frequently found and rare overall.

## References

- (1) Tietz, J. I.; Schwalen, C. J.; Patel, P. S.; Maxson, T.; Blair, P. M.; Tai, H.-C.; Zakai, U. I.; Mitchell, D. A. A new genome-mining tool redefines the lasso peptide biosynthetic landscape. *Nat. Chem. Biol.* **2017**, *13* (5), 470–478.
- (2) Chiu, J.; March, P. E.; Lee, R.; Tillett, D. Site-directed, Ligase-Independent Mutagenesis (SLIM): a single-tube methodology approaching 100% efficiency in 4 h. *Nucleic Acids Res.* **2004**, *32* (21), e174.
- (3) Chhetri, G.; Kalita, P.; Tripathi, T. An efficient protocol to enhance recombinant protein expression using ethanol in *Escherichia coli*. *MethodsX* **2015**, *2*, 385–391.
- (4) Sievers, F.; Wilm, A.; Dineen, D.; Gibson, T. J.; Karplus, K.; Li, W.; Lopez, R.; McWilliam, H.; Remmert, M.; Söding, J.; Thompson, J. D., Higgins, D. G. Fast, scalable generation of high-quality protein multiple sequence alignments using Clustal Omega. *Mol. Syst. Biol.* **2011**, *7*, 539.
- (5) Kumar, S.; Stecher, G.; Li, M.; Knyaz, C.; Tamura, K.; Battistuzzi, F. U. MEGA X: Molecular Evolutionary Genetics Analysis across Computing Platforms. *Mol. Biol. Evol.* **2018**, *35* (6), 1547–1549.
- (6) Kozłowski, L. P. IPC - Isoelectric Point Calculator. *Biol. Direct.* **2016**, *11*, 55.
- (7) Bogdanova, L. N.; Mchedlov-Petrosyan, N. O.; Vodolazkaya, N. A.; Lebed, A. V. The influence of beta-cyclodextrin on acid-base and tautomeric equilibrium of fluorescein dyes in aqueous solution. *Carbohydr. Res.* **2010**, *345* (13), 1882–1890.
- (8) Pirrone, G. F.; Wang, H.; Canfield, N.; Chin, A. S.; Rhodes, T. A.; Makarov, A. A. Use of MALDI-MS Combined with Differential Hydrogen-Deuterium Exchange for Semiautomated Protein Global Conformational Screening. *Anal. Chem.* **2017**, *89* (16), 8351–8357.
- (9) Morgan, C. R.; Engen, J. R. Investigating Solution-Phase Protein Structure and Dynamics by Hydrogen Exchange Mass Spectrometry. *Curr. Protoc. Protein Sci.* **2009**, *58*, 17.6.1-17.6.17.
